# Supplementary material
Source: MDPI journal article supplement (https://www.mdpi.com/1424-8247/17/5/606)

## Supplementary material

# Arylamines QSAR-Based Design and Molecular Dynamics of New Phenylthiophene and Benzimidazole Derivatives with Affinity for the C111, Y268, and H73 Sites of SARS-CoV-2 PLpro Enzyme

Gianfranco Sabadini <sup>1</sup>, Marco Mellado <sup>2,\*</sup>, César Morales <sup>3</sup> and Jaime Mella <sup>1,4,\*</sup>

<sup>1</sup> Instituto de Química y Bioquímica, Facultad de Ciencias, Universidad de Valparaíso, Av. Gran Bretaña 1111, Valparaíso 2360102, Chile; gianfranco.sabadini@postgrado.uv.cl

<sup>2</sup> Instituto de Investigación y Postgrado, Facultad de Ciencias de la Salud, Universidad Central de Chile, Santiago 8330507, Chile

<sup>3</sup> Laboratorio de Materiales Funcionales, Centro Integrativo de Biología y Química Aplicada (CIBQA), Facultad de Ciencias de la Salud, Universidad Bernardo OHiggins, General Gana 1702, Santiago 8320000, Chile; cesar.morales@ubo.cl

<sup>4</sup> Centro de Investigación, Desarrollo e Innovación de Productos Bioactivos (CInBIO), Universidad de Valparaíso, Av. Gran Bretaña 1111, Valparaíso 2360102, Chile

\* Correspondence: marco.mellado@ucentral.cl (M.M.); jaime.mella@uv.cl (J.M.)

|                                                                                                                                       |         |
|---------------------------------------------------------------------------------------------------------------------------------------|---------|
| <b>Table S1.</b> The experimental pIC <sub>50</sub> , predictive pIC <sub>50</sub> and residual values for the training and test set. | Pag. 2  |
| <b>Table S2.</b> The SMILES of the entire data set used for the QSAR model.                                                           | Pag. 5  |
| <b>Figure S1.</b> High res. Images of Docking and Molecular Dynamics                                                                  | Pag. 8  |
| <b>Figure S2.</b> The RMSD of the antivirals and designed molecules.                                                                  | Pag. 52 |

**Table S1.** The experimental pIC<sub>50</sub>, predictive pIC<sub>50</sub> and residual values for the training and test set.

| pIC <sub>50</sub> |        |        |       |
|-------------------|--------|--------|-------|
| Mol               | Exp    | Pred   | Res   |
| 1                 | 5.7932 | 5.2703 | 0.52  |
| 2                 | 5.9586 | 5.7228 | 0.24  |
| 3                 | 5.2596 | 5.5638 | -0.30 |
| 4                 | 5.2218 | 5.6027 | -0.38 |
| 5                 | 5.9957 | 5.6569 | 0.34  |
| 6                 | 6.2218 | 5.7595 | 0.46  |
| 7                 | 5.9208 | 5.5601 | 0.36  |
| 8                 | 6.0969 | 5.6826 | 0.41  |
| 9                 | 6.1549 | 5.8123 | 0.34  |
| 10                | 5.7959 | 5.8425 | -0.05 |
| 11                | 5.3665 | 5.7334 | -0.37 |
| 12                | 5.6198 | 5.7446 | -0.12 |
| 13                | 5.4089 | 5.4229 | -0.01 |
| 14                | 5.8861 | 5.8705 | 0.02  |
| * 15              | 5.4815 | 5.5415 | -0.06 |
| 16                | 5.2147 | 5.6203 | -0.41 |
| 17                | 4.9706 | 4.9969 | -0.03 |
| 18                | 5.4815 | 5.4849 | 0.00  |
| 19                | 5.6198 | 5.9756 | -0.36 |
| 20                | 4.9626 | 5.2422 | -0.28 |
| * 21              | 5.7959 | 6.1161 | -0.32 |
| 22                | 5.7212 | 5.8610 | -0.14 |
| 23                | 5.7447 | 6.0421 | -0.30 |
| 24                | 5.5528 | 5.1787 | 0.37  |
| 25                | 6.2291 | 5.9227 | 0.31  |
| 26                | 5.8861 | 5.9265 | -0.04 |
| 27                | 5.7447 | 5.7750 | -0.03 |
| * 28              | 6.0458 | 6.3180 | -0.27 |
| 29                | 6.4089 | 6.4614 | -0.05 |
| 30                | 6.2518 | 6.4008 | -0.15 |
| 31                | 6.1249 | 6.0665 | 0.06  |
| 32                | 6.0132 | 5.8246 | 0.19  |
| 33                | 6.0915 | 5.7794 | 0.31  |
| 34                | 6.0362 | 6.0576 | -0.02 |
| 35                | 6.0862 | 6.0020 | 0.08  |
| 36                | 6.1938 | 6.3055 | -0.11 |
| * 37              | 6.1549 | 6.3037 | -0.15 |
| 38                | 6.4815 | 6.2844 | 0.20  |
| 39                | 6.1938 | 6.3979 | -0.20 |
| 40                | 6.3872 | 6.4158 | -0.03 |
| 41                | 6.6778 | 6.3946 | 0.28  |
| 42                | 6.3665 | 6.3969 | -0.03 |

|   |    |        |        |       |
|---|----|--------|--------|-------|
|   | 43 | 6.9469 | 6.3889 | 0.56  |
| * | 44 | 6.6021 | 6.3989 | 0.20  |
| * | 45 | 6.0915 | 5.9576 | 0.13  |
|   | 46 | 5.7447 | 5.8732 | -0.13 |
| * | 47 | 5.9586 | 5.9038 | 0.05  |
|   | 48 | 5.6383 | 5.6343 | 0.00  |
|   | 49 | 5.8539 | 5.9360 | -0.08 |
|   | 50 | 5.5436 | 5.1288 | 0.41  |
|   | 51 | 5.1612 | 5.1707 | -0.01 |
|   | 52 | 4.8239 | 4.4353 | 0.39  |
| * | 53 | 5.1249 | 5.2728 | -0.15 |
|   | 54 | 5.0000 | 5.4479 | -0.45 |
|   | 55 | 5.0000 | 5.1307 | -0.13 |
|   | 56 | 5.1192 | 5.3934 | -0.27 |
| * | 57 | 5.2441 | 5.4936 | -0.25 |
|   | 58 | 4.8861 | 4.7325 | 0.15  |
|   | 59 | 4.3645 | 4.6669 | -0.30 |
|   | 60 | 4.5258 | 4.6212 | -0.10 |
|   | 61 | 4.5058 | 4.6240 | -0.12 |
|   | 62 | 4.4584 | 4.5846 | -0.13 |
| * | 63 | 4.4389 | 4.7455 | -0.31 |
| * | 64 | 5.0223 | 4.6103 | 0.41  |
|   | 65 | 4.5800 | 4.5345 | 0.05  |
|   | 66 | 4.6421 | 4.5707 | 0.07  |
| * | 67 | 4.1209 | 4.0921 | 0.03  |
|   | 68 | 4.0400 | 4.1036 | -0.06 |
|   | 69 | 6.1938 | 6.3859 | -0.19 |
| * | 70 | 6.1675 | 5.7847 | 0.38  |
| * | 71 | 6.2076 | 6.1755 | 0.03  |
|   | 72 | 5.7305 | 5.6786 | 0.05  |
|   | 73 | 5.4841 | 5.6207 | -0.14 |
|   | 74 | 5.6126 | 5.6438 | -0.03 |
| * | 75 | 5.5918 | 5.1286 | 0.46  |
|   | 76 | 5.6576 | 5.2757 | 0.38  |
|   | 77 | 3.9031 | 4.1783 | -0.28 |
| * | 78 | 4.2157 | 4.3637 | -0.15 |
| * | 79 | 5.6073 | 5.0538 | 0.55  |
|   | 80 | 5.2924 | 5.3276 | -0.04 |
|   | 81 | 5.1938 | 5.3670 | -0.17 |
|   | 82 | 5.1549 | 5.2915 | -0.14 |
| * | 83 | 4.7773 | 4.8182 | -0.04 |
|   | 84 | 4.7077 | 4.5312 | 0.18  |
|   | 85 | 4.7905 | 4.5555 | 0.23  |
|   | 86 | 4.8928 | 5.0501 | -0.16 |
|   | 87 | 4.6253 | 4.7200 | -0.09 |
|   | 88 | 4.7595 | 4.7559 | 0.00  |

|   |     |        |        |       |
|---|-----|--------|--------|-------|
|   | 89  | 4.6882 | 4.6716 | 0.02  |
|   | 90  | 4.4123 | 4.6861 | -0.27 |
|   | 91  | 4.7160 | 5.1436 | -0.43 |
|   | 92  | 5.1487 | 5.4517 | -0.30 |
| * | 93  | 4.9314 | 5.3882 | -0.46 |
|   | 94  | 5.2899 | 5.8119 | -0.52 |
|   | 95  | 6.2076 | 5.7904 | 0.42  |
|   | 96  | 5.8013 | 5.7898 | 0.01  |
| * | 97  | 5.8861 | 5.7878 | 0.10  |
|   | 98  | 5.6073 | 5.8467 | -0.24 |
|   | 99  | 6.1805 | 5.8153 | 0.37  |
|   | 100 | 6.1739 | 5.8121 | 0.36  |
|   | 101 | 5.9393 | 5.8987 | 0.04  |
| * | 102 | 5.3990 | 5.6804 | -0.28 |
|   | 103 | 5.8861 | 5.9937 | -0.11 |
|   | 104 | 5.1878 | 5.2057 | -0.02 |
|   | 105 | 5.0511 | 5.1481 | -0.10 |
|   | 106 | 5.5654 | 5.1510 | 0.41  |
|   | 107 | 5.2596 | 5.3131 | -0.05 |
|   | 108 | 5.2132 | 5.3635 | -0.15 |
|   | 109 | 6.0506 | 5.6907 | 0.36  |
|   | 110 | 5.3546 | 5.4823 | -0.13 |
| * | 111 | 5.8416 | 5.4159 | 0.43  |
|   | 112 | 5.0353 | 5.6163 | -0.58 |
| * | 113 | 5.0888 | 5.1672 | -0.08 |

---

\* Test set compound



**Table S2.** The SMILES of the entire data set used for the QSAR model.

| Molecule | pIC <sub>50</sub><br>Exp | SMILES                                                                           |
|----------|--------------------------|----------------------------------------------------------------------------------|
| 1        | 5.7932                   | <chem>CC(c1cccc2ccccc12)NC(c1c(C)ccc(N)c1)=O</chem>                              |
| 2        | 5.9586                   | <chem>CC(c1cccc2ccccc12)NC(c1c(C)ccc(NC(CC2)CCN2C(OC(C)(C)C)=O)c1)=O</chem>      |
| 3        | 5.2596                   | <chem>CC(c1cccc2ccccc12)NC(c1c(C)ccc(NC(C(C2)CN2C(OC(C)(C)C)=O)=O)c1)=O</chem>   |
| 4        | 5.2218                   | <chem>CC(c1cccc2ccccc12)NC(c1c(C)ccc(NC(C(CC2)CCN2C(OC(C)(C)C)=O)=O)c1)=O</chem> |
| 5        | 5.9957                   | <chem>CC(c1cccc2ccccc12)NC(c1c(C)ccc(NC2CNC2)c1)=O</chem>                        |
| 6        | 6.2218                   | <chem>CC(c1cccc2ccccc12)NC(c1c(C)ccc(NC2CCNCC2)c1)=O</chem>                      |
| 7        | 5.9208                   | <chem>CC(c1cccc2ccccc12)NC(c1c(C)ccc(NC(C2CNC2)=O)c1)=O</chem>                   |
| 8        | 6.0969                   | <chem>CC(c1cccc2ccccc12)NC(c1c(C)ccc(NC(C2CCNCC2)=O)c1)=O</chem>                 |
| 9        | 6.1549                   | <chem>CC(c1cccc2ccccc12)NC(c1c(C)ccc(NC2CCN(C)CC2)c1)=O</chem>                   |
| 10       | 5.7959                   | <chem>CC(c1cccc2ccccc12)NC(c1c(C)ccc(N(C)C2CN(C)C2)c1)=O</chem>                  |
| 11       | 5.3665                   | <chem>CC(c1cccc2ccccc12)NC(c1c(C)ccc(NC2CN(C)C2)c1)=O</chem>                     |
| 12       | 5.6198                   | <chem>CC(c1cccc2ccccc12)NC(c1c(C)ccc(N(C)C2CNC2)c1)=O</chem>                     |
| 13       | 5.4089                   | <chem>CC(c1cccc2ccccc12)NC(c1c(C)ccc(CNCC(O)=O)c1)=O</chem>                      |
| 14       | 5.8861                   | <chem>CC(c1cccc2ccccc12)NC(c1c(C)ccc(CNC2CNC2)c1)=O</chem>                       |
| 15       | 5.4815                   | <chem>CC(c1cccc2ccccc12)NC(c1c(C)ccc(CN(C2)CC2C(O)=O)c1)=O</chem>                |
| 16       | 5.2147                   | <chem>CC(c1cccc2ccccc12)NC(c1c(C)ccc(CN(CC2)CCC2C(O)=O)c1)=O</chem>              |
| 17       | 4.9706                   | <chem>CC(c1cccc2ccccc12)NC(c(cc(cc1)N(C)C2CNC2)c1Cl)=O</chem>                    |
| 18       | 5.4815                   | <chem>CC(c1csc2c1cccc2)NC(c1c(C)ccc(N)c1)=O</chem>                               |
| 19       | 5.6198                   | <chem>CC(c1csc2c1cccc2)NC(c1c(C)ccc(N(C)C2CNC2)c1)=O</chem>                      |
| 20       | 4.9626                   | <chem>CC(c1csc2c1cccc2)NC(c(cc(cc1)N(C)C2CNC2)c1Cl)=O</chem>                     |
| 21       | 5.7959                   | <chem>CC(c1c(c(cccc2)c2[nH]2)c2ccc1)NC(c1c(C)ccc(N(C)C2CNC2)c1)=O</chem>         |
| 22       | 5.7212                   | <chem>CC(c1csc2c1cccc2)NC(c1c(C)ccc(NC2CNC2)c1)=O</chem>                         |
| 23       | 5.7447                   | <chem>CC(c1c(c(cccc2)c2[nH]2)c2ccc1)NC(c1c(C)ccc(NC2CNC2)c1)=O</chem>            |
| 24       | 5.5528                   | <chem>CC(c1cc(-c2cccs2)ccc1)NC(c(cc(cc1)NC2CNC2)c1Cl)=O</chem>                   |
| 25       | 6.2291                   | <chem>CC(c1cccc(-c2cccs2)c1)NC(c1c(C)ccc(NC2CNC2)c1)=O</chem>                    |
| 26       | 5.8861                   | <chem>CC(c1cccc(-c2csc2)c1)NC(c1c(C)ccc(NC2CNC2)c1)=O</chem>                     |
| 27       | 5.7447                   | <chem>CC(c1cc(-c2c[nH]cc2)ccc1)NC(c1c(C)ccc(NC2CNC2)c1)=O</chem>                 |
| 28       | 6.0458                   | <chem>CC(c1cccc(-c2ccc(CN3CCOCC3)s2)c1)NC(c1c(C)ccc(NC2CNC2)c1)=O</chem>         |
| 29       | 6.4089                   | <chem>CC(c1cccc(-c2ccc(CNC3CCCC3)s2)c1)NC(c1c(C)ccc(NC2CNC2)c1)=O</chem>         |
| 30       | 6.2518                   | <chem>CC(c1cccc(-c2ccc(CN3CCCC3)s2)c1)NC(c1c(C)ccc(NC2CNC2)c1)=O</chem>          |
| 31       | 6.1249                   | <chem>CC(c1cccc(-c2ccc(C)s2)c1)NC(c1c(C)ccc(NC2CNC2)c1)=O</chem>                 |
| 32       | 6.0132                   | <chem>CC(c1cccc(-c2ccc(C(O)=O)s2)c1)NC(c1c(C)ccc(NC2CNC2)c1)=O</chem>            |
| 33       | 6.0915                   | <chem>CC(c1cccc(-c2ccc(C(OC)=O)s2)c1)NC(c1c(C)ccc(NC2CNC2)c1)=O</chem>           |
| 34       | 6.0362                   | <chem>CC(c1cccc(-c2ccc(C(NCC3OCCC3)=O)s2)c1)NC(c1c(C)ccc(NC2CNC2)c1)=O</chem>    |
| 35       | 6.0862                   | <chem>CC(c1cccc(-c2ccc(C(NCC3OCC3)=O)s2)c1)NC(c1c(C)ccc(NC2CNC2)c1)=O</chem>     |
| 36       | 6.1938                   | <chem>CC(c1cccc(-c2ccc(CN(CC3)CC3O)s2)c1)NC(c1c(C)ccc(NC2CNC2)c1)=O</chem>       |
| 37       | 6.1549                   | <chem>CC(c1cccc(-c2ccc(CN(CC3)CC3O)s2)c1)NC(c1c(C)ccc(NC2CNC2)c1)=O</chem>       |
| 38       | 6.4815                   | <chem>CC(c1cccc(-c2ccc(CNC3COCC3)s2)c1)NC(c1c(C)ccc(NC2CNC2)c1)=O</chem>         |
| 39       | 6.1938                   | <chem>CC(c1cccc(-c2ccc(CNC(CCN3)C3=O)s2)c1)NC(c1c(C)ccc(NC2CNC2)c1)=O</chem>     |
| 40       | 6.3872                   | <chem>CC(c1cccc(-c2ccc(CNC(C3)CNC3=O)s2)c1)NC(c1c(C)ccc(NC2CNC2)c1)=O</chem>     |
| 41       | 6.6778                   | <chem>CC(c1cccc(-c2ccc(CNC(CC3)CC3O)s2)c1)NC(c1c(C)ccc(NC2CNC2)c1)=O</chem>      |
| 42       | 6.3665                   | <chem>CC(c1cccc(-c2ccc(CNC(CC3)CC3O)s2)c1)NC(c1c(C)ccc(NC2CNC2)c1)=O</chem>      |
| 43       | 6.9469                   | <chem>CC(c1cccc(-c2ccc(CNC(CC3)CC3O)s2)c1)NC(c1c(C)ccc(NC2CNC2)c1)=O</chem>      |

44 6.6021 CC(c1cccc(-c2ccc(CNC(CC3)CC3O)s2)c1)NC(c1c(C)ccc(NC2CNC2)c1)=O  
 45 6.0915 CC(c1cccc(-c2ccc(CNC(OC(C)(C)C)=O)s2)c1)NC(c1c(C)ccc(N)c1)=O  
 46 5.7447 CC(c1cccc(-c2ccc(CN)s2)c1)NC(c1c(C)ccc(N)c1)=O  
 47 5.9586 CC(c1cccc(-c2ccc(CNC(C3CCCC3)=O)s2)c1)NC(c1c(C)ccc(N)c1)=O  
 48 5.6383 CC(c1cccc(-c2ccc(CNC(C)=O)s2)c1)NC(c1c(C)ccc(NC(C)=O)c1)=O  
 49 5.8539 CC(c1cccc(-c2ccc(CNC(CC3)CC3O)s2)c1)NC(c1c(C)ccc(NC(C)=O)c1)=O  
 50 5.5436 O=C1N(c2ccccc2)[Se]c2c1cccc2  
 51 5.1612 CC(c1cccc2ccccc12)NC(c1c(C)cccc1)=O  
 52 4.8239 CC(c1cccc2ccccc12)NC(c(ccc1)c1Cl)=O  
 53 5.1249 CC(c1cccc2ccccc12)NC(c(cc1)c(C)cc1N)=O  
 54 5.0000 CC(c1cccc2ccccc12)NC(c1c(C)ccc(N(C)C)c1)=O  
 55 5.0000 CC(c1cccc2ccccc12)NC(c(cc1)c(C)cc1NS(C)(=O)=O)=O  
 56 5.1192 CC(c1cccc2ccccc12)N(Cl)Cc2c1cccc2  
 57 5.2441 CC(c1cccc2ccccc12)N(Cl)Cc2c1ccc(N)c2  
 58 4.8861 Oc(cc1)ccc1C(OC1c2c(O)cc(O)c1-c(cc(cc1)C(OC3c4c(O)cc(O)c3)=CC4=O)c1O)=CC2=O  
 59 4.3645 COc(cc1)ccc1C(OC1c2c(O)cc(O)c1-c(cc(cc1)C(OC3c4c(O)cc(O)c3)=CC4=O)c1O)=CC2=O  
 60 4.5258 COc(cc1O)cc(OC(c(cc2)cc(-c(c(OC(c(cc3)ccc3O)=C3)c(c(O)c4)C3=O)c4O)c2OC)=C2)c1C2=O  
 61 4.5058 COc(cc1)ccc1C(OC1c2c(O)cc(O)c1-c(cc(cc1)C(OC3c4c(O)cc(O)c3)=CC4=O)c1OC)=CC2=O  
 62 4.4584 COc(cc1)ccc1C(OC1c2c(O)cc(O)c1-c(cc(cc1)C(OC3c4c(O)cc(OC)c3)=CC4=O)c1OC)=CC2=O  
 63 4.4389 Oc1ccc(C(C(c(OC(c(cc2)cc(O)c2O)=C2)c(c(O)c3)C2=O)c3O)C2=O)Oc3c2c(O)cc(O)c3cc1  
 64 5.0223 Oc(cc1)ccc1C(OC(c1c2O)cc(O)c2Oc(cc2)ccc2C(OC2c3c(O)cc(O)c2)=CC3=O)=CC1=O  
 65 4.5800 COc(cc1)ccc1C(OC(c1c2O)cc(OC)c2Oc(cc2)ccc2C(OC2c3c(O)cc(O)c2)=CC3=O)=CC1=O  
 66 4.6421 COc(ccc(C(OC1c2c(O)cc(O)c1)=CC2=O)c1)c1Oc(cc1)ccc1C(OC1c2c(O)cc(O)c1)=CC2=O  
 67 4.1209 Oc(cc1)ccc1C(OC1c2c(O)cc(O)c1)=CC2=O  
 68 4.0400 COc(cc1)ccc1C(OC1c2c(O)cc(O)c1)=CC2=O  
 69 6.1938 CCOC(SSC(OCC)=S)=S  
 70 6.1675 S=C(N1CCCC1)SSC(N1CCCC1)=S  
 71 6.2076 CN(C)C(SSC(N(C)C)=S)=S  
 72 5.7305 COc(nc12)ccc2nc(cc(cc2)Cl)c2c1Nc(cc1CN2CCCC2)cc(CN2CCCC2)c1O  
 73 5.4841 CN(C)Cc1cc(Nc(c2c3)c(ccc(Cl)c4)c4nc2ccc3OC)cc(CN(C)C)c1O  
 74 5.6126 COc(cc12)ccc2nc(cc(cc2)Cl)c2c1Nc(cc1CN2CCCC2)cc(CN2CCCC2)c1O  
 75 5.5918 COc(cc12)ccc2nc(cc(cc2)Cl)c2c1Nc(cc1)cc(CN2CCCC2)c1O  
 76 5.6576 CC(c1cc2ccccc2cc1)NC(c1c(C)ccc(N)c1)=O  
 77 3.9031 OCC(C(C(C1O)O)O)OC1Oc1cc(O)cc/C=C/c(cc2)ccc2O)c1  
 78 4.2157 Oc1ccc(/C=C/c2cc(O)cc(O)c2)cc1  
 79 5.6073 Cc1[n+](Cc2ncnc2)c(C(c(cccc2)c2C2=O)=O)c2n1CCOC.[Br-]  
 80 5.2924 CC(c1cccc2ccccc12)NC(c1c(C)ccc(NC(NC(N)=O)=O)c1)=O  
 81 5.1938 CC(c1cccc2ccccc12)NC(c1c(C)ccc(NC(C=C)=O)c1)=O  
 82 5.1549 CC(c1cccc2ccccc12)NC(c1c(C)ccc(NC(OC(cc2)ccc2[N+])([O-])=O)=O)c1)=O  
 83 4.7773 CC(C)c1c(CNCc2cc(C(O)=O)c(C)o2)occ1  
 84 4.7077 OC(CCN(C1CCOCC1)C(c(cc1)ccc1OC1CCCC1)=O)=O  
 85 4.7905 OC(CCN(C1CCOCC1)C(CCc1ncc(-c(cccc2)c2F)o1)=O)=O  
 86 4.8928 Cc1nsc(NC)c1C(Nc(cc1)cc(CC2)c1N(Cc(cc1)ccc1Cl)C2=O)=O  
 87 4.6253 OC(CN(Cc1ccccc1)C(c1ccc(CN(Cc2ccccc2)S(c(cc2)ccc2Cl)(=O)=O)cc1)=O)=O  
 88 4.7595 OC(C(Cc1ccccc1)NC(c1ccc(CN(Cc2ccccc2)S(c(cc2)ccc2Cl)(=O)=O)cc1)=O)=O  
 89 4.6882 OC(C(c1ccccc1)NC(c1ccc(CN(Cc2ccccc2)S(c(cc2)ccc2Cl)(=O)=O)cc1)=O)=O

|     |        |                                                              |
|-----|--------|--------------------------------------------------------------|
| 90  | 4.4123 | <chem>CC(C)(Cc(cc1)ccc1-c(cc1)cc(C(F)(F)F)c1Cl)C(O)=O</chem> |
| 91  | 4.7160 | <chem>CC(c1cccc2ccccc12)N(C)CC(C(N1)=O)=CNC1=O</chem>        |
| 92  | 5.1487 | <chem>CC(c1cccc2ccccc12)N(C)Cc1ccc[nH]1</chem>               |
| 93  | 4.9314 | <chem>CC(c1cccc2ccccc12)N(C)Cc(cc1)cnc1OC</chem>             |
| 94  | 5.2899 | <chem>CC(c1cccc2ccccc12)N(C)Cc1ccc2ncccc2c1</chem>           |
| 95  | 6.2076 | <chem>CC(c1cccc2ccccc12)N(C)Cc1c(cc[nH]2)c2ccc1</chem>       |
| 96  | 5.8013 | <chem>CC(c1cccc2ccccc12)N(C)Cc(cc1)cc2c1[nH]cc2</chem>       |
| 97  | 5.8861 | <chem>CC(c1cccc2ccccc12)N(C)Cc1cc([nH]cc2)c2cc1</chem>       |
| 98  | 5.6073 | <chem>CC(c1cccc2ccccc12)N(C)Cc(cc1)cc2c1[nH]nn2</chem>       |
| 99  | 6.1805 | <chem>CC(c1cccc2ccccc12)N(C)Cc(cc1)cc2c1[nH]nc2</chem>       |
| 100 | 6.1739 | <chem>CC(c1cccc2ccccc12)N(C)Cc1n[nH]c2c1cccc2</chem>         |
| 101 | 5.9393 | <chem>CC(c1cccc2ccccc12)N(C)Cc1nn(CC(N)=O)c2c1cccc2</chem>   |
| 102 | 5.3990 | <chem>CC(c1cccc2ccccc12)N(C)Cc1n[nH]c(cc2)c1cc2O</chem>      |
| 103 | 5.8861 | <chem>CC(c1cccc2ccccc12)N(C)Cc1ccc(B(O)O)cc1</chem>          |
| 104 | 5.1878 | <chem>CC(c1cccc2ccccc12)N(C)Cc(cc1F)cc(F)c1O</chem>          |
| 105 | 5.0511 | <chem>CC(c1cccc2ccccc12)N(C)Cc(cc1)cc(O)c1O</chem>           |
| 106 | 5.5654 | <chem>CC(c1cccc2ccccc12)N(C)Cc1cc(O)cc(O)c1</chem>           |
| 107 | 5.2596 | <chem>CC(c1cccc2ccccc12)N(C)Cc(cc1)ncc1O</chem>              |
| 108 | 5.2132 | <chem>CC(c1cccc2ccccc12)N(C)Cc1nccc(S(N)(=O)=O)c1</chem>     |
| 109 | 6.0506 | <chem>CC(c1cccc2ccccc12)N(C)Cc1c(C)ccc(N)c1</chem>           |
| 110 | 5.3546 | <chem>CC(c1cccc2ccccc12)N(C)Cc(cc1)ccc1NC(C)=O</chem>        |
| 111 | 5.8416 | <chem>CC(c1cccc2ccccc12)N(C)Cc(c(F)cc(N)c1)c1F</chem>        |
| 112 | 5.0353 | <chem>CC(c1cccc2ccccc12)N(C)Cc(cc1)ccc1N(C)CCO</chem>        |
| 113 | 5.0888 | <chem>O=C1C2=C(N=C(C3=CN=CC=C3)O2)C(C4=CC=CC=C41)=O</chem>   |

---

**Figure S1.** High res. Images of Docking and Molecular Dynamics

Indinavir in Y268 (State of protonation 1):

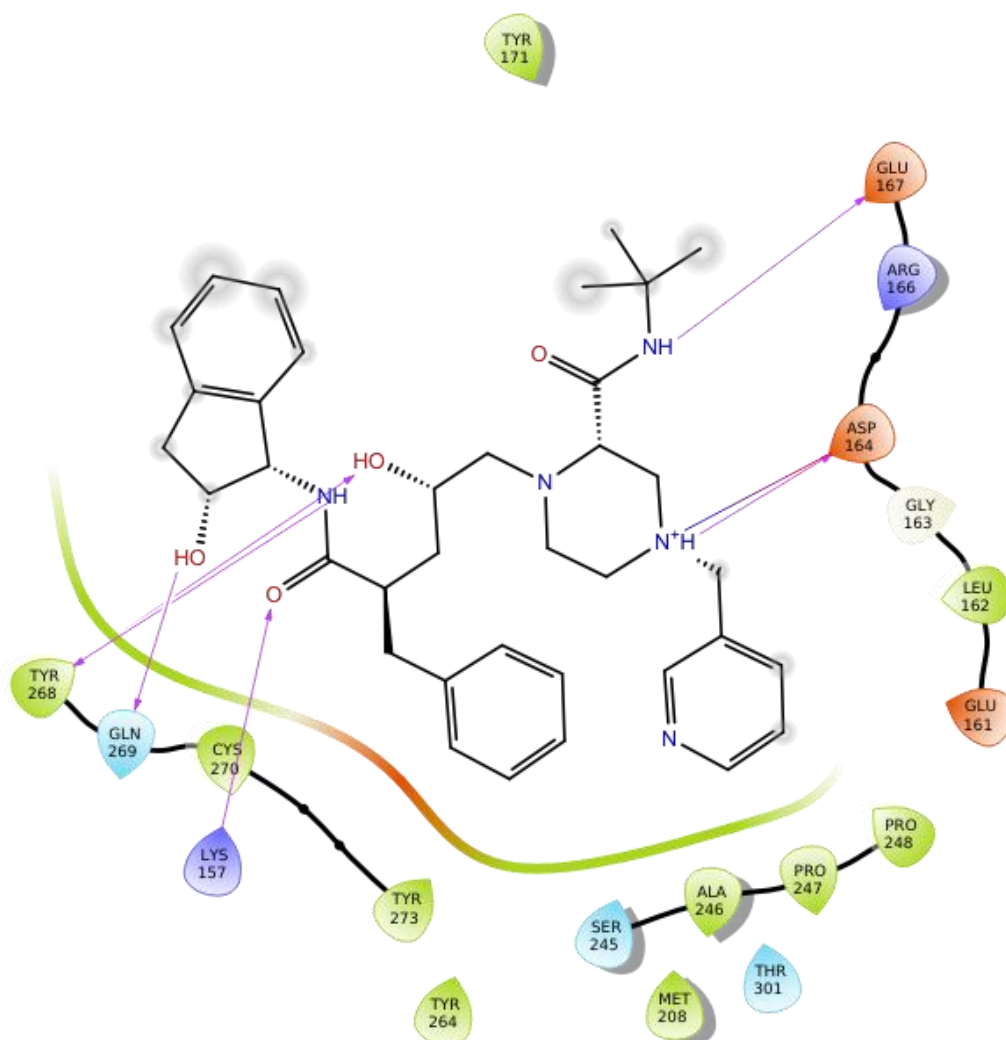

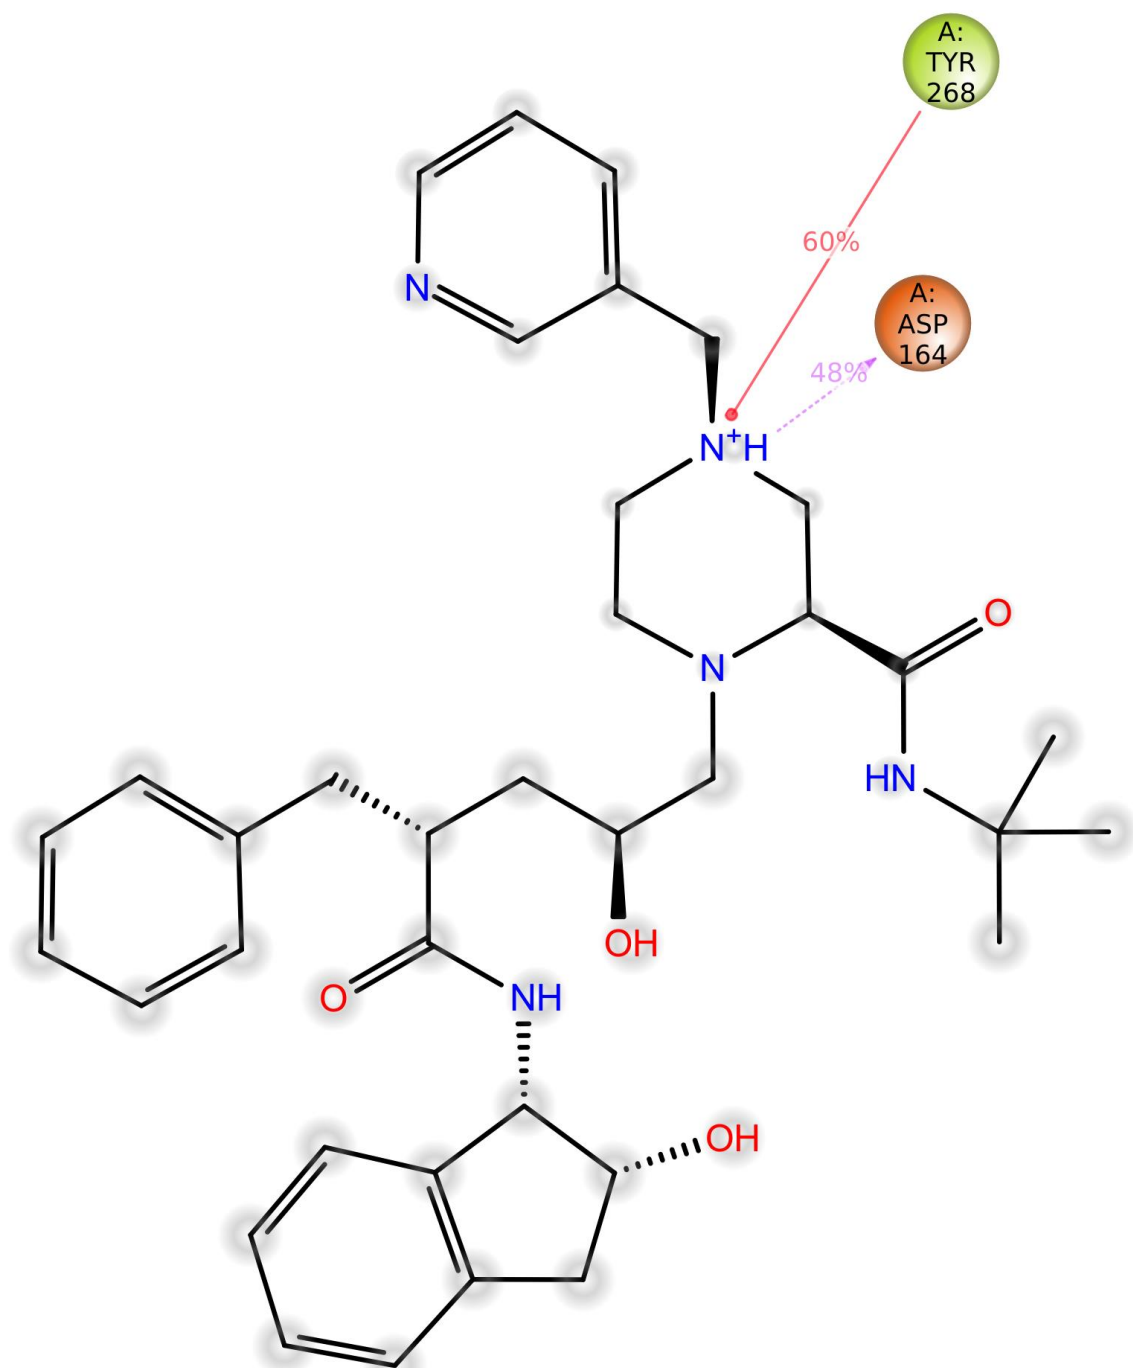

Indinavir in Y268 (State of protonation 2):

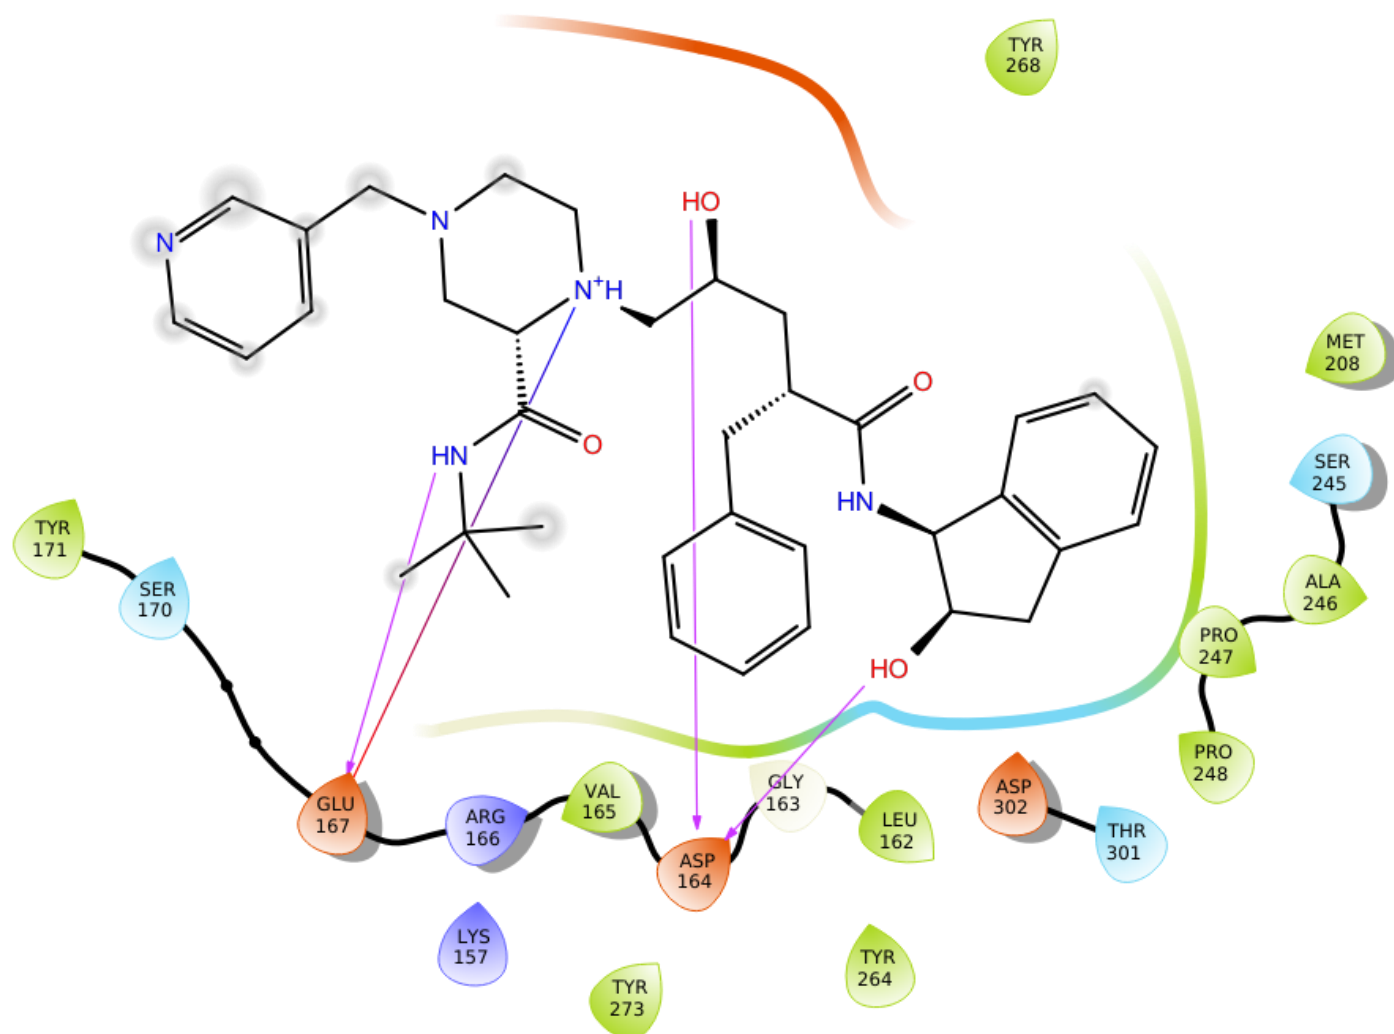

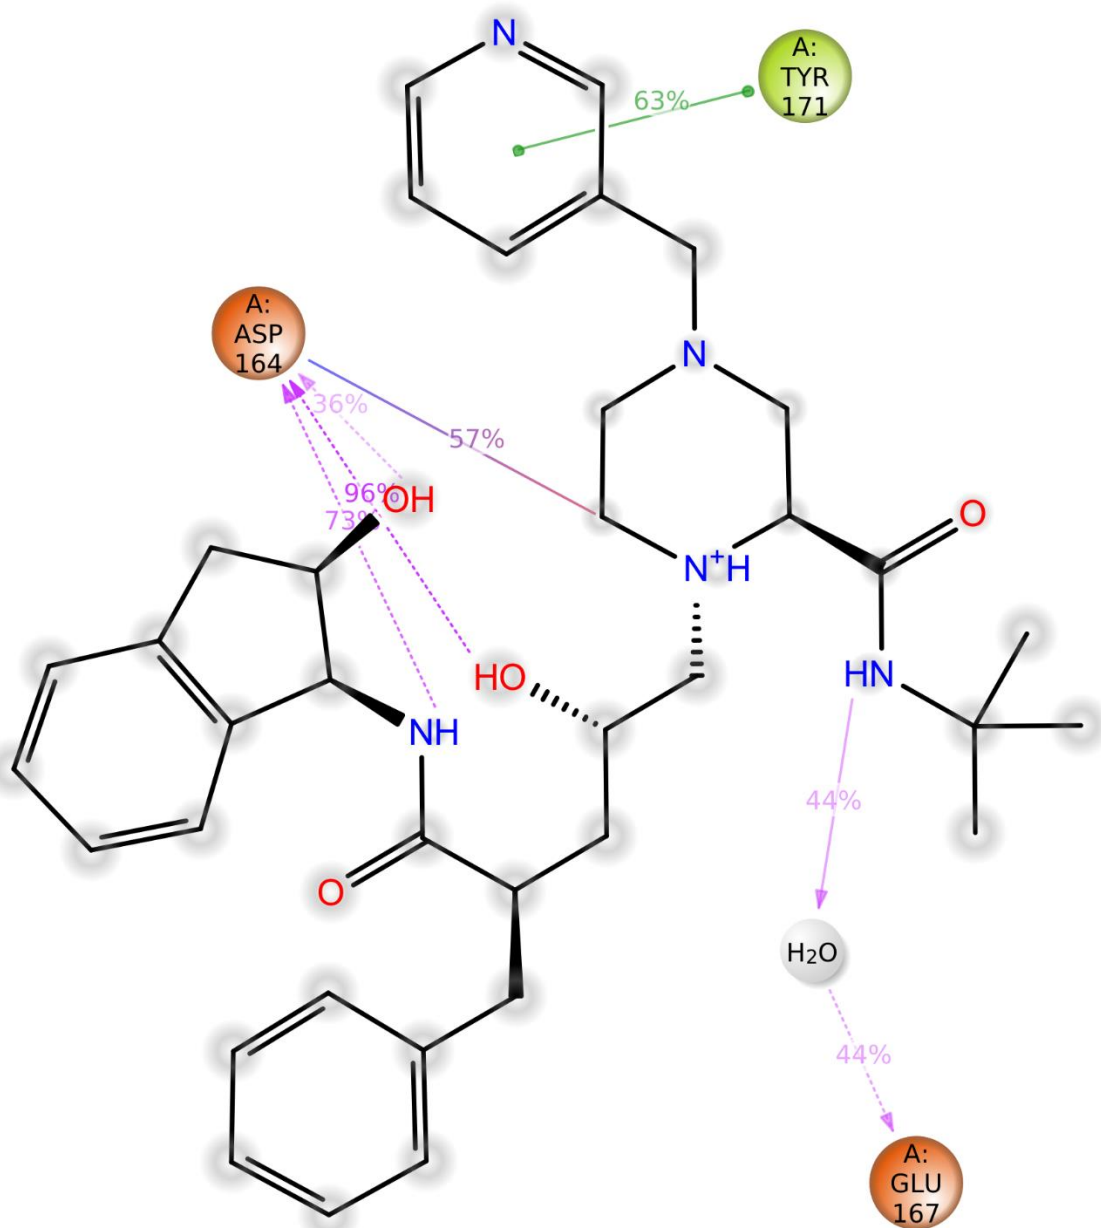





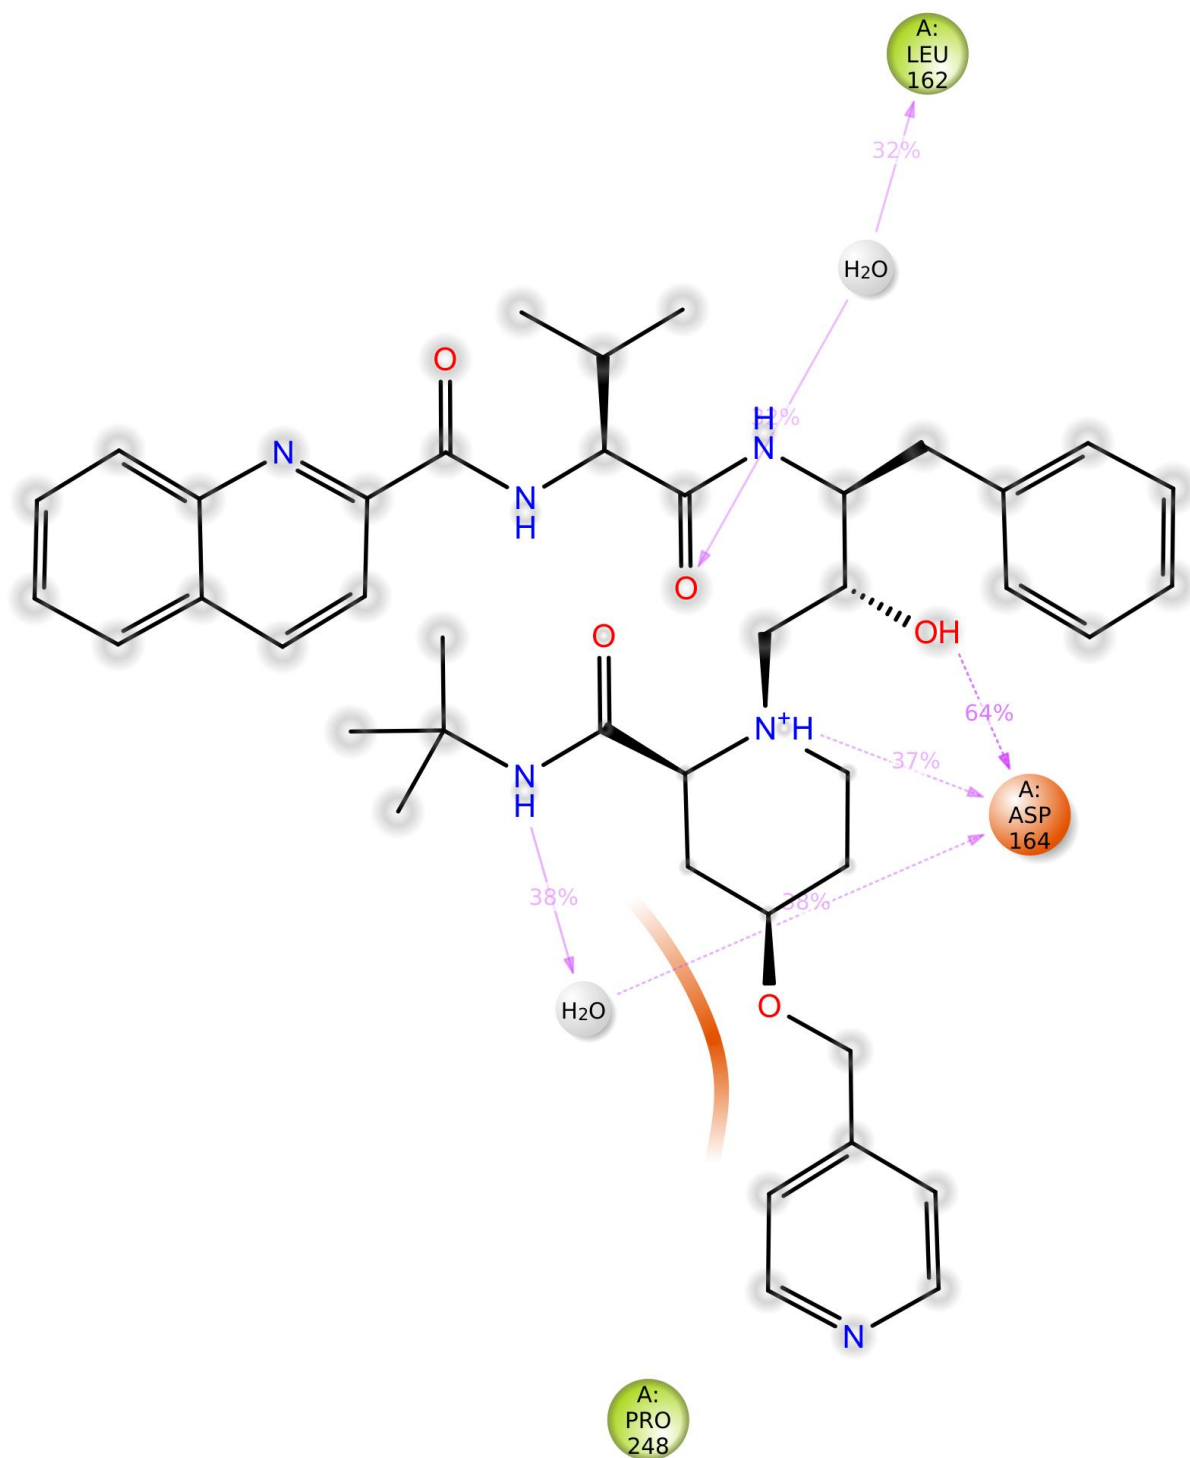

# Etravirine in Y268

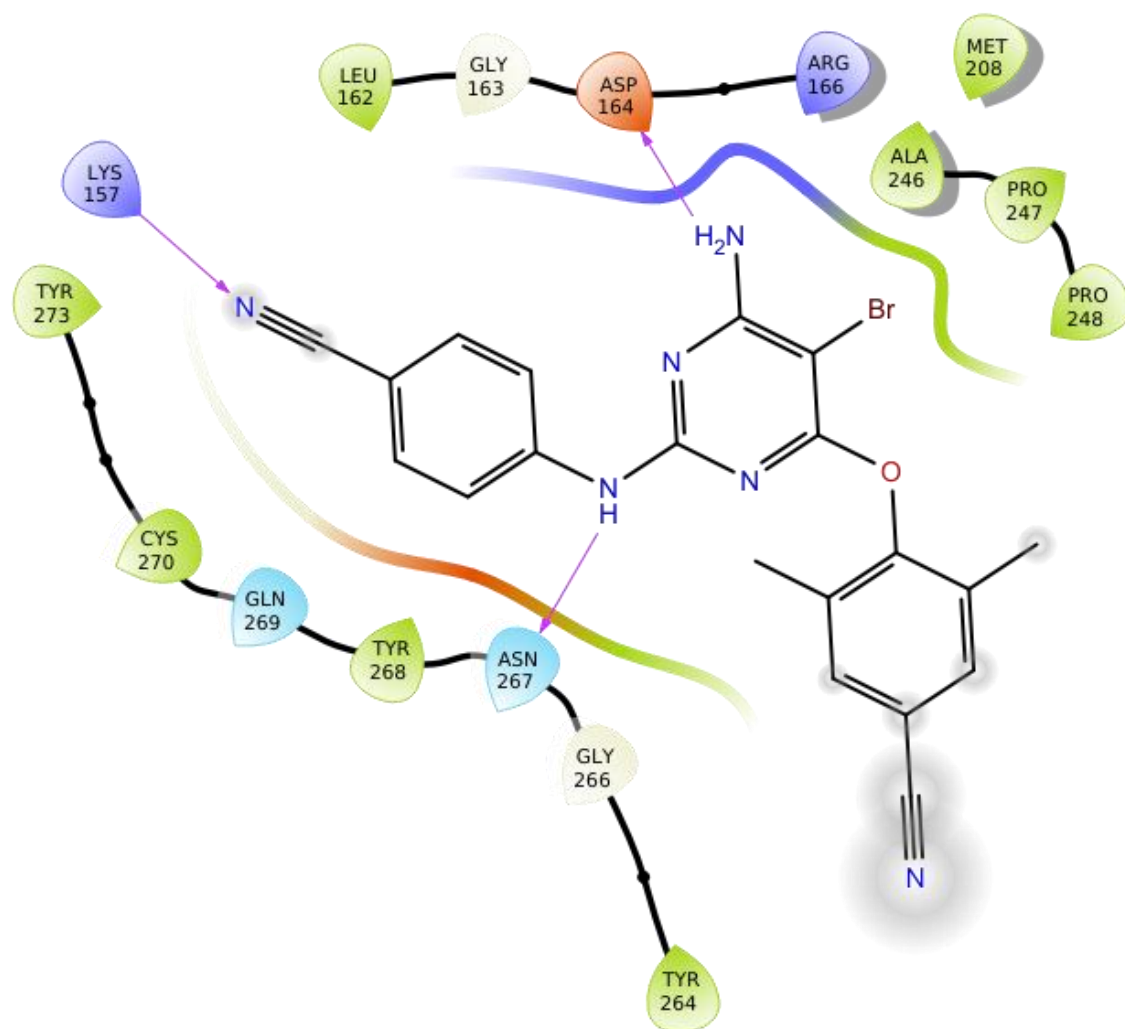

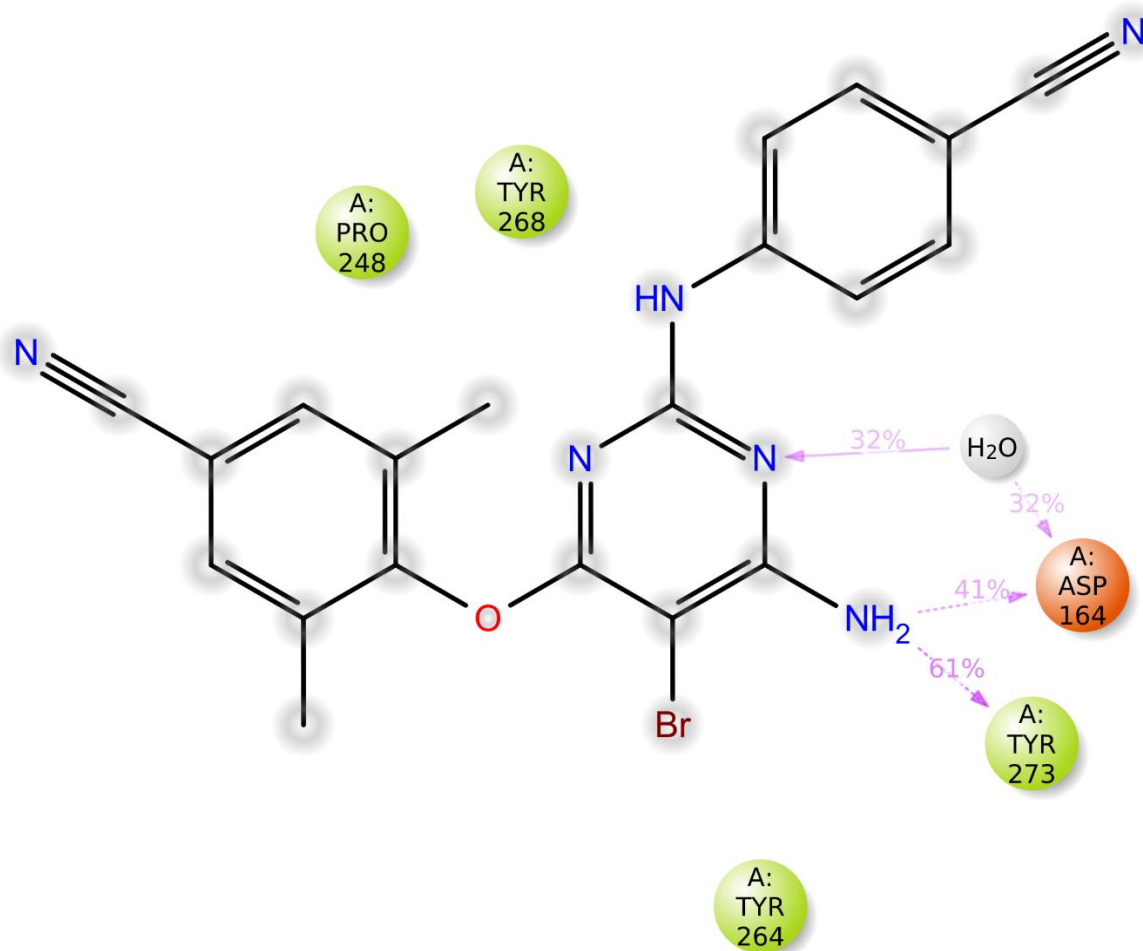

Compound Pred12 in Y268

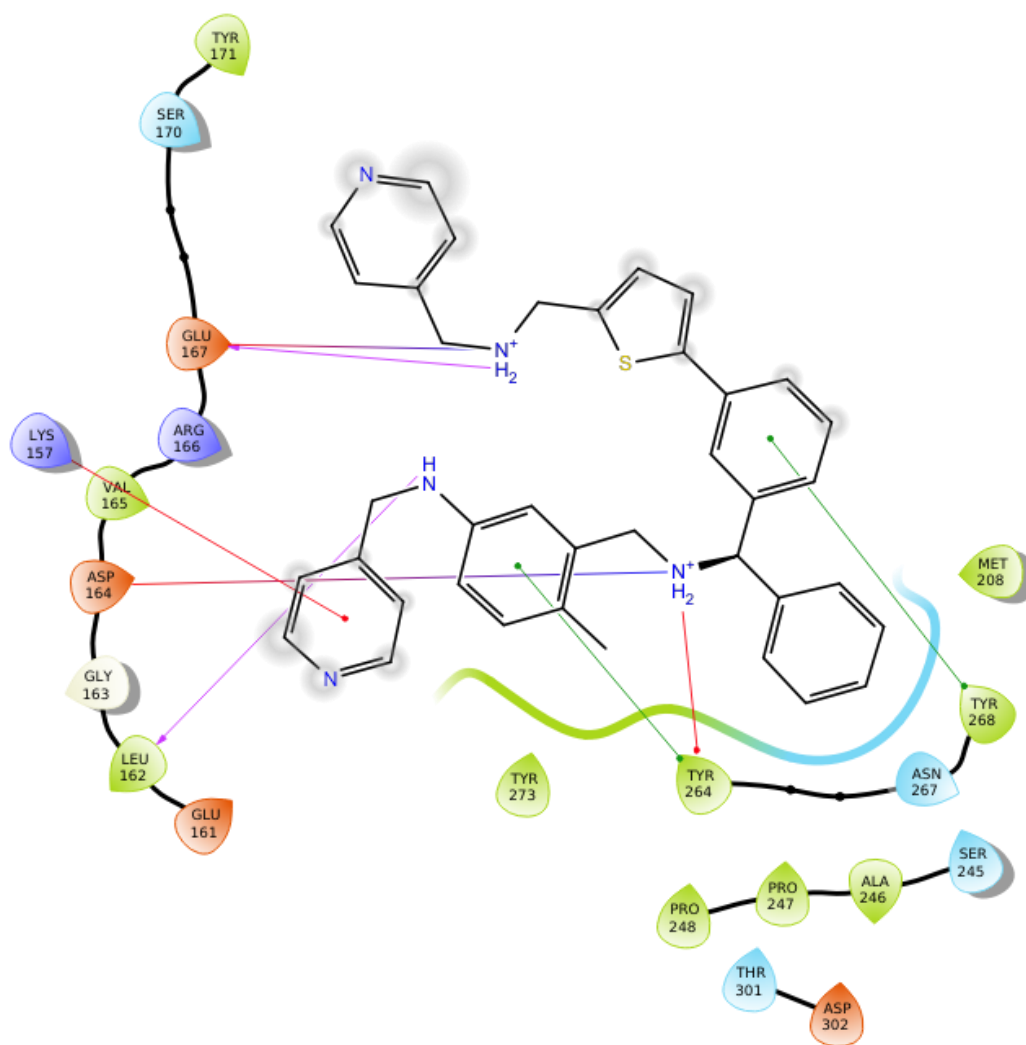

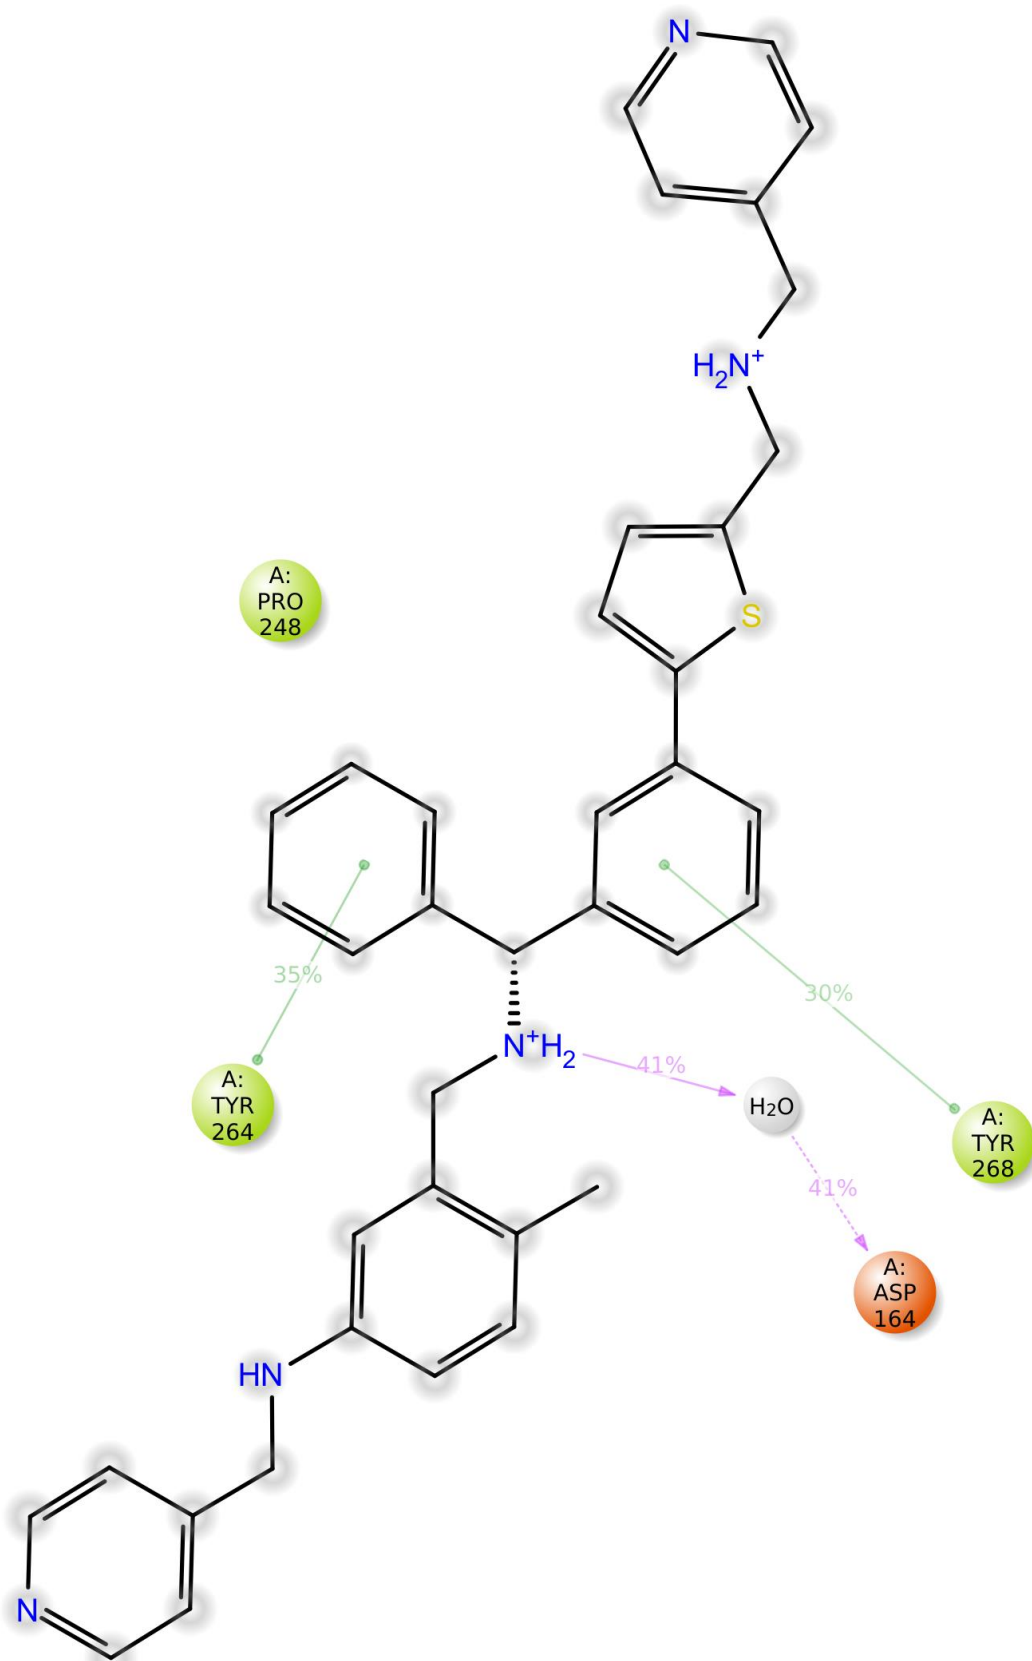

# Compound Pred14 in Y268

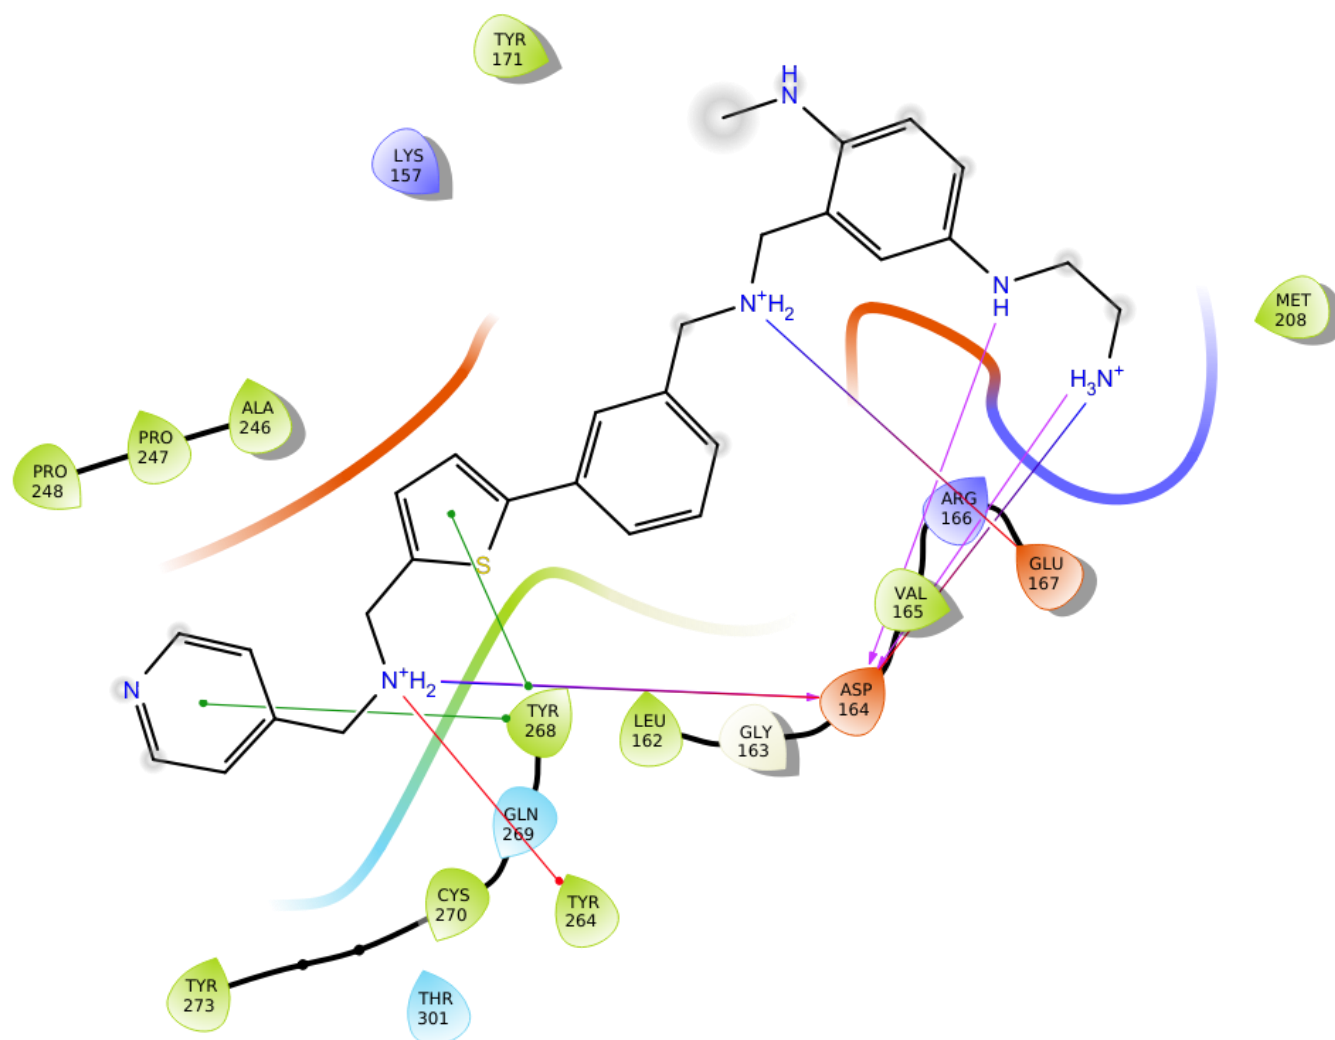

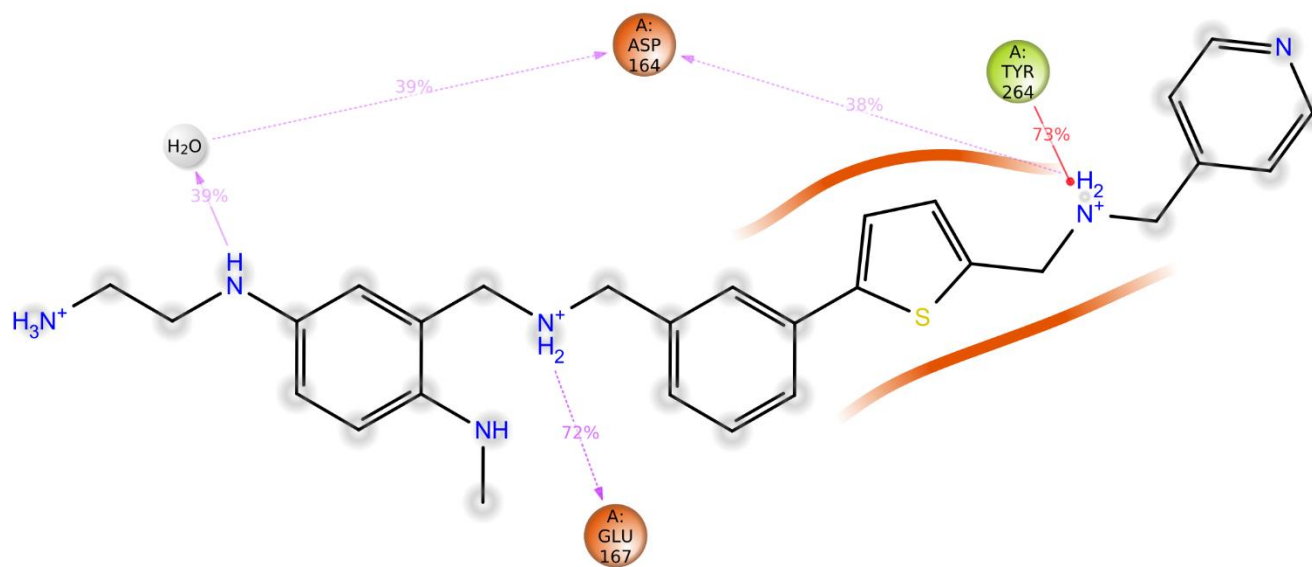

Compound Pred15 in Y268

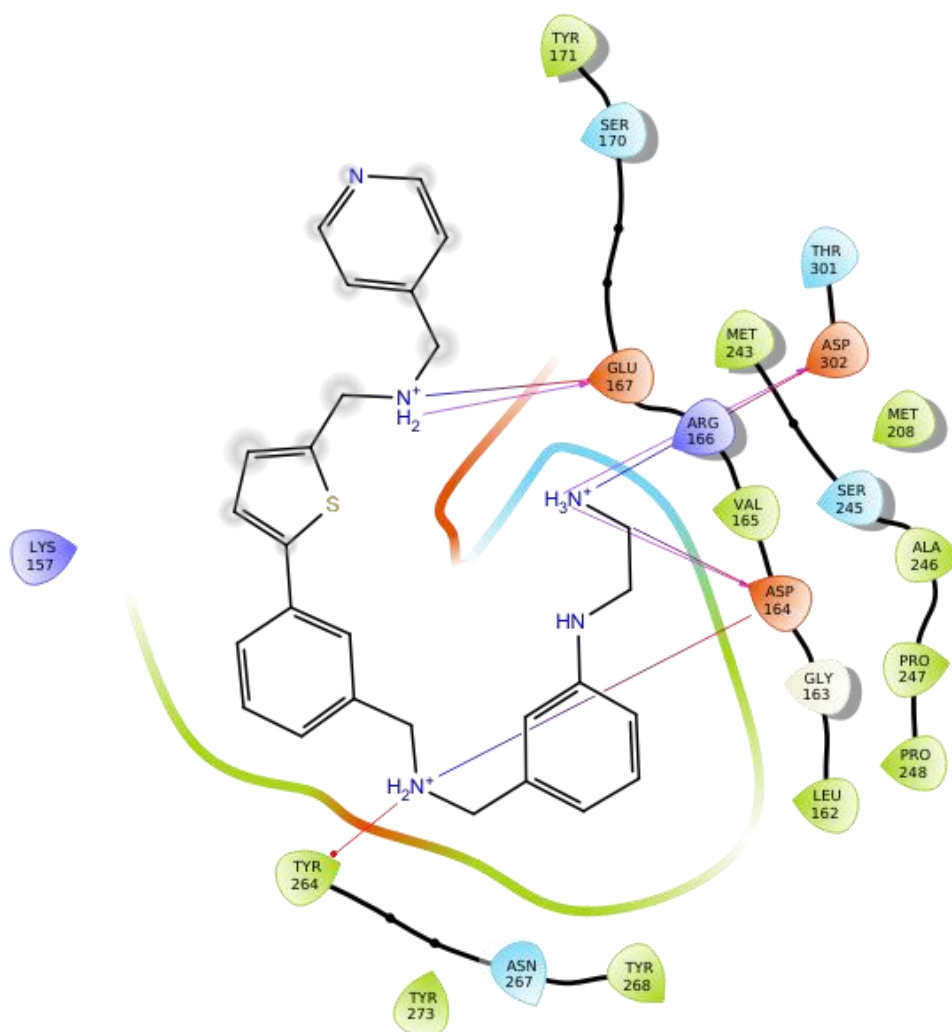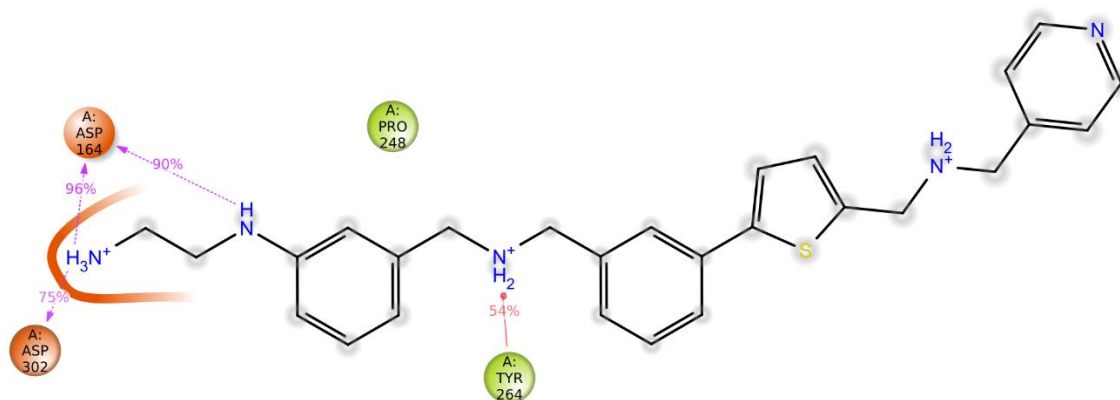



Compound Pred10 in Y268

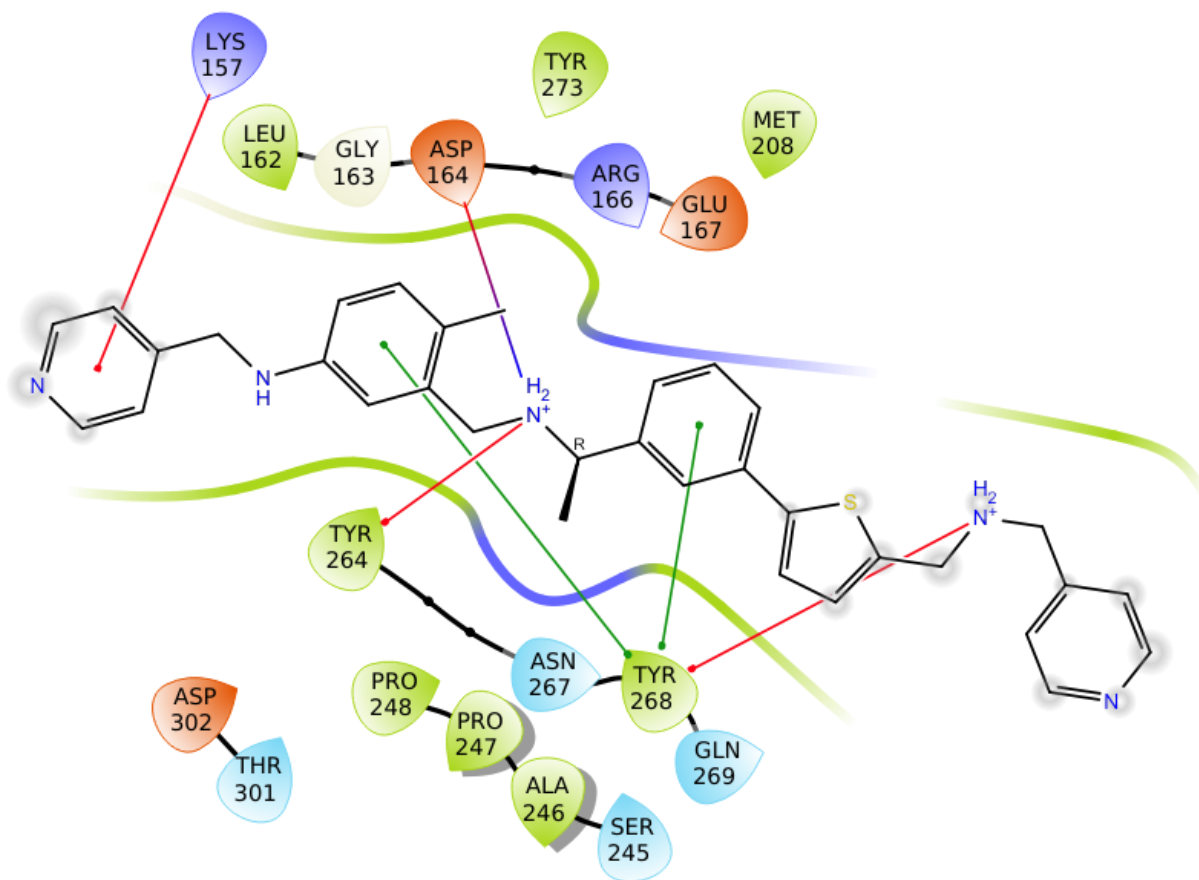

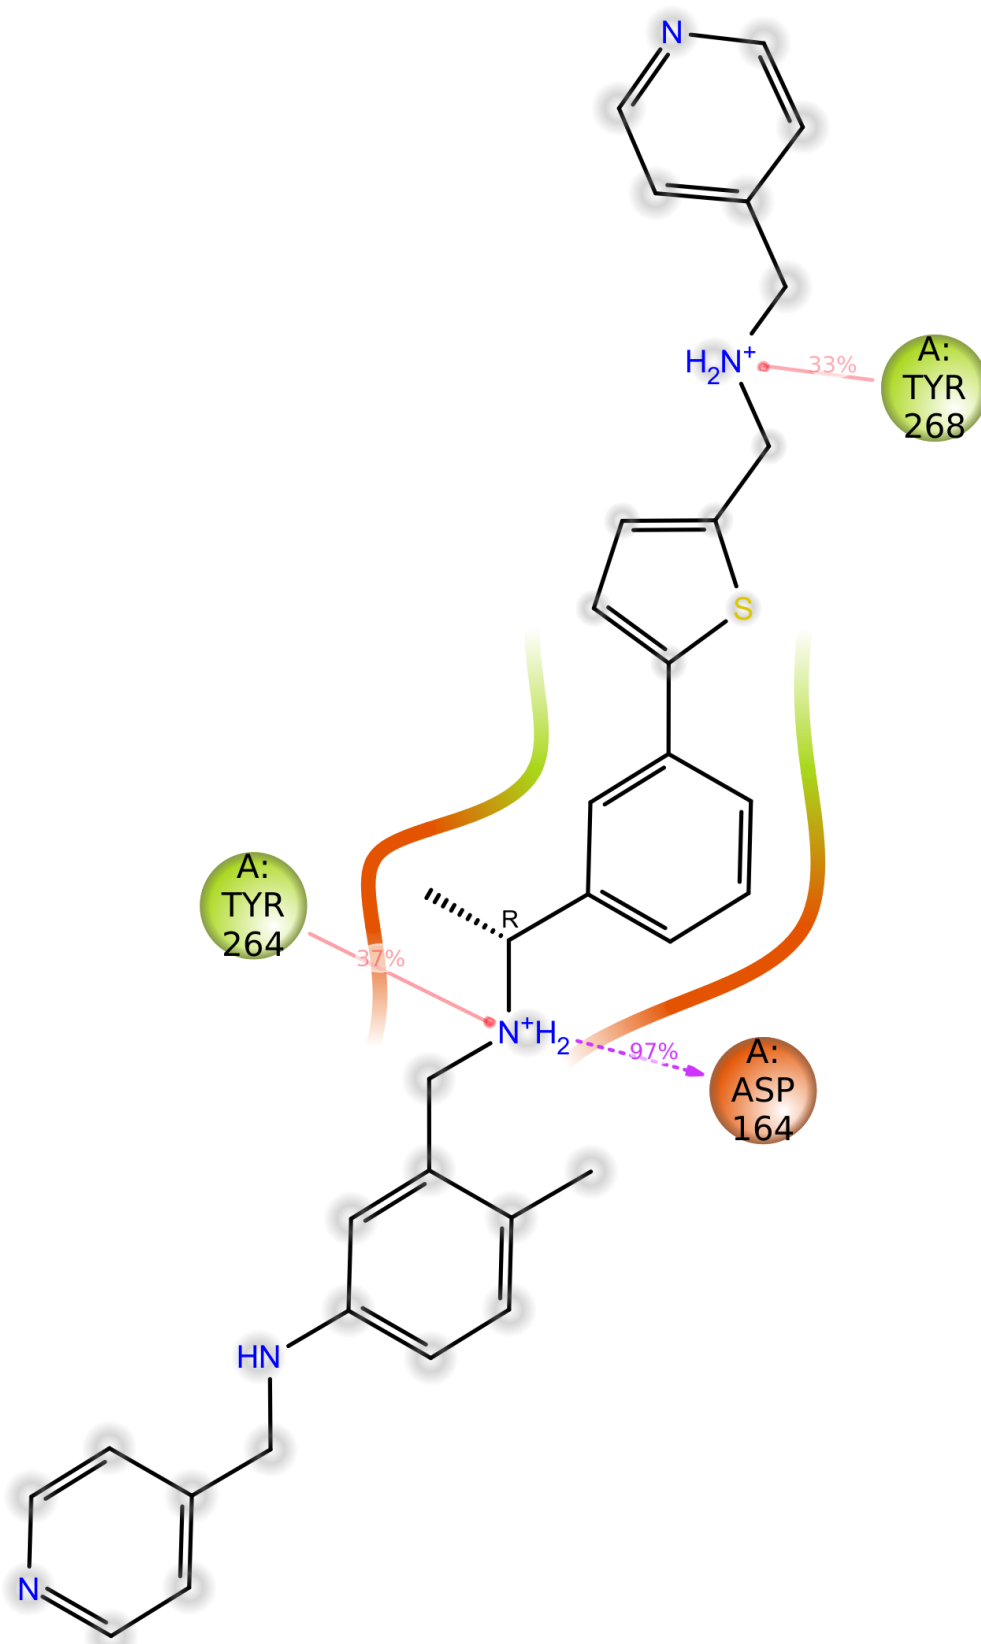

# Etravirine in C111

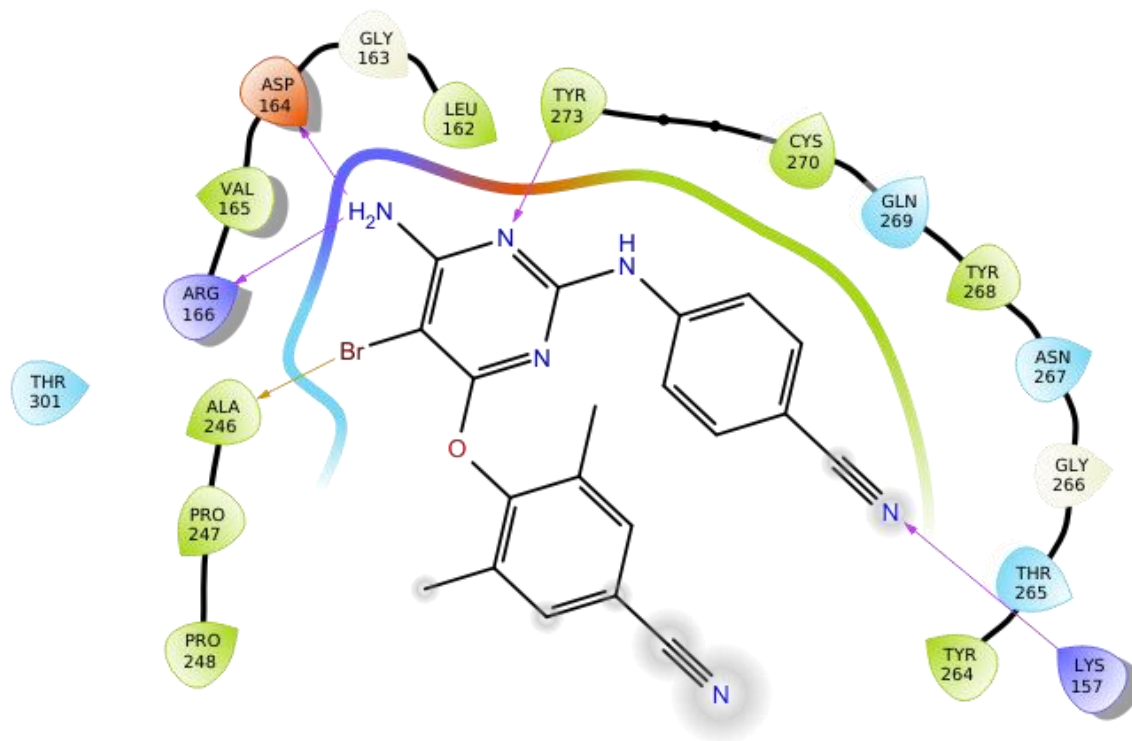

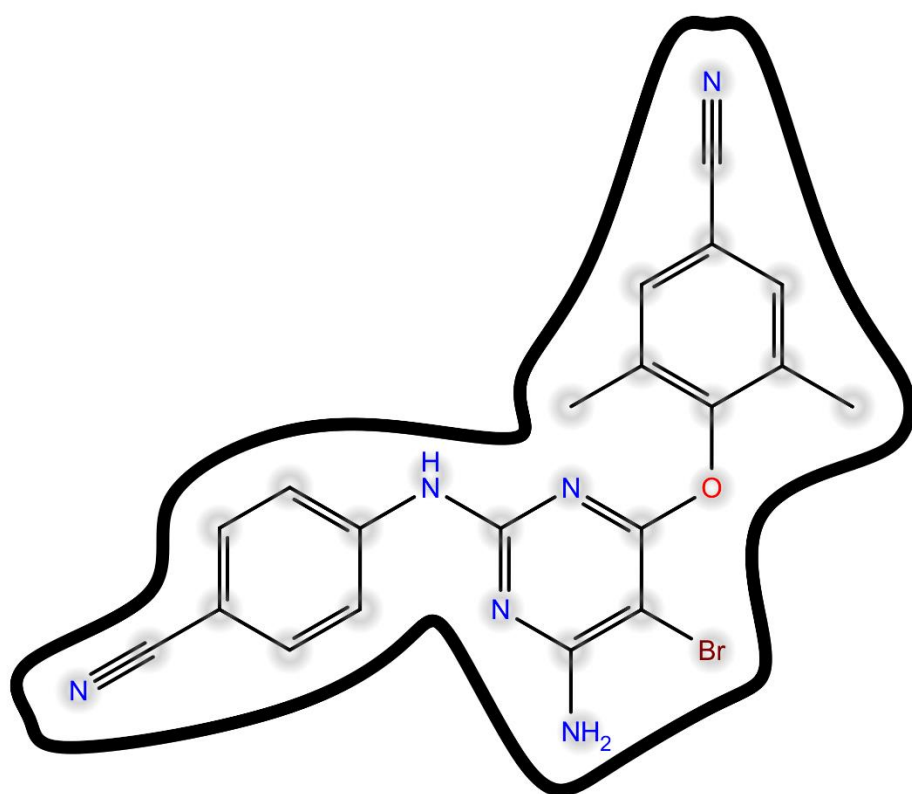

Indinavir in C111 (State of protonation 1)

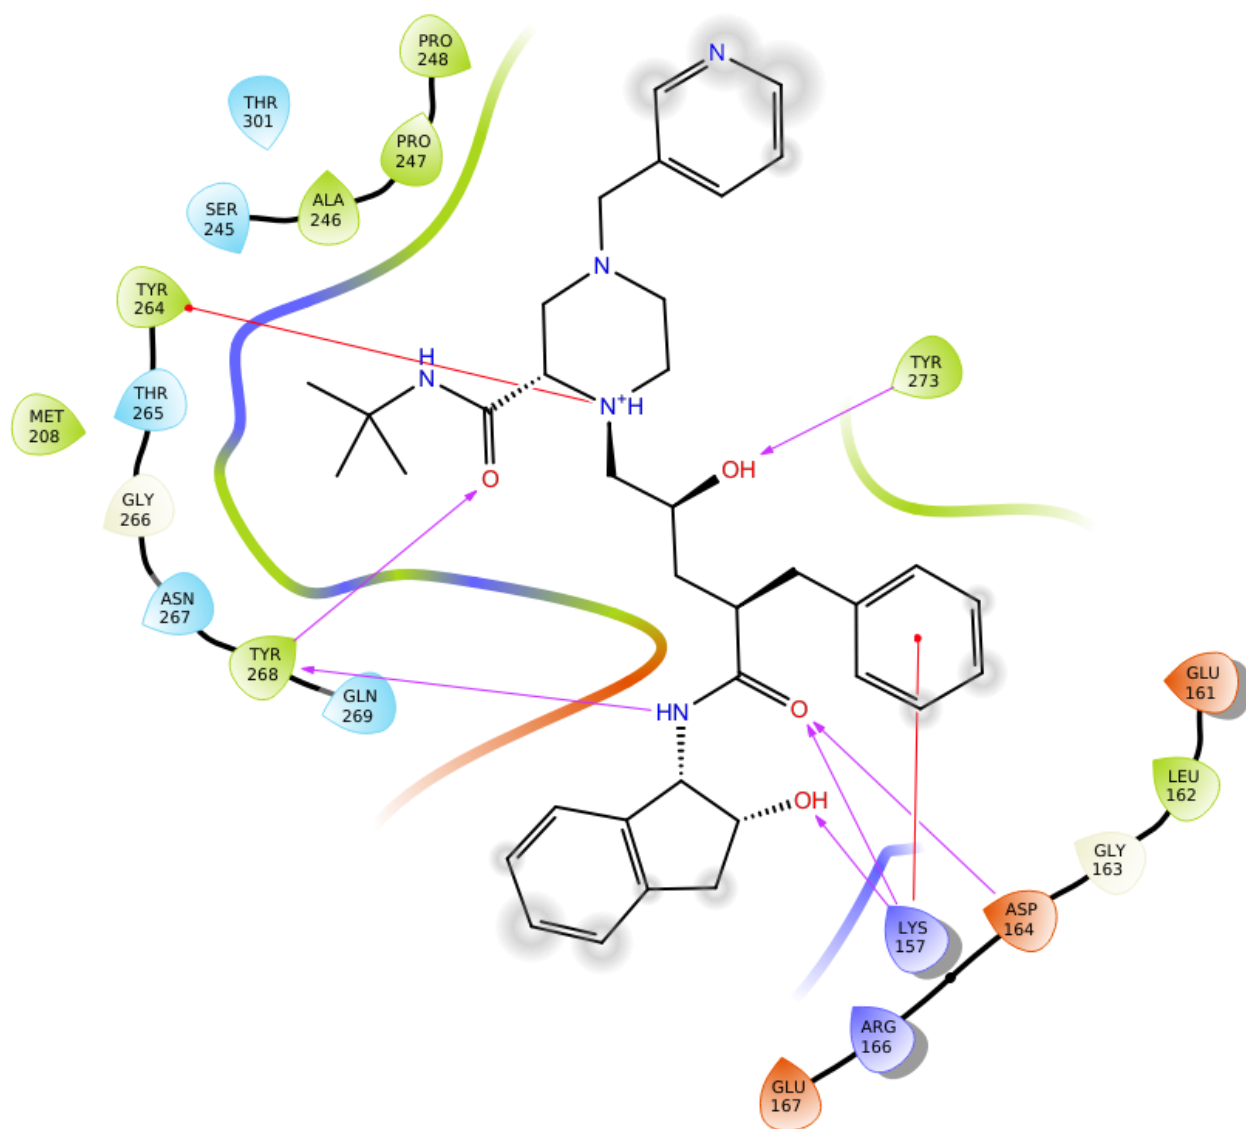

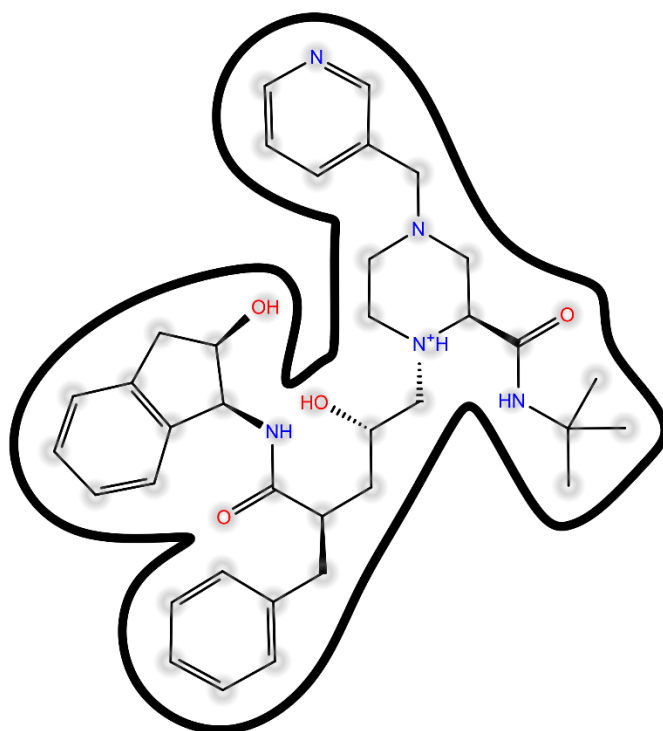

Indinavir in C111 (State of protonation 2)

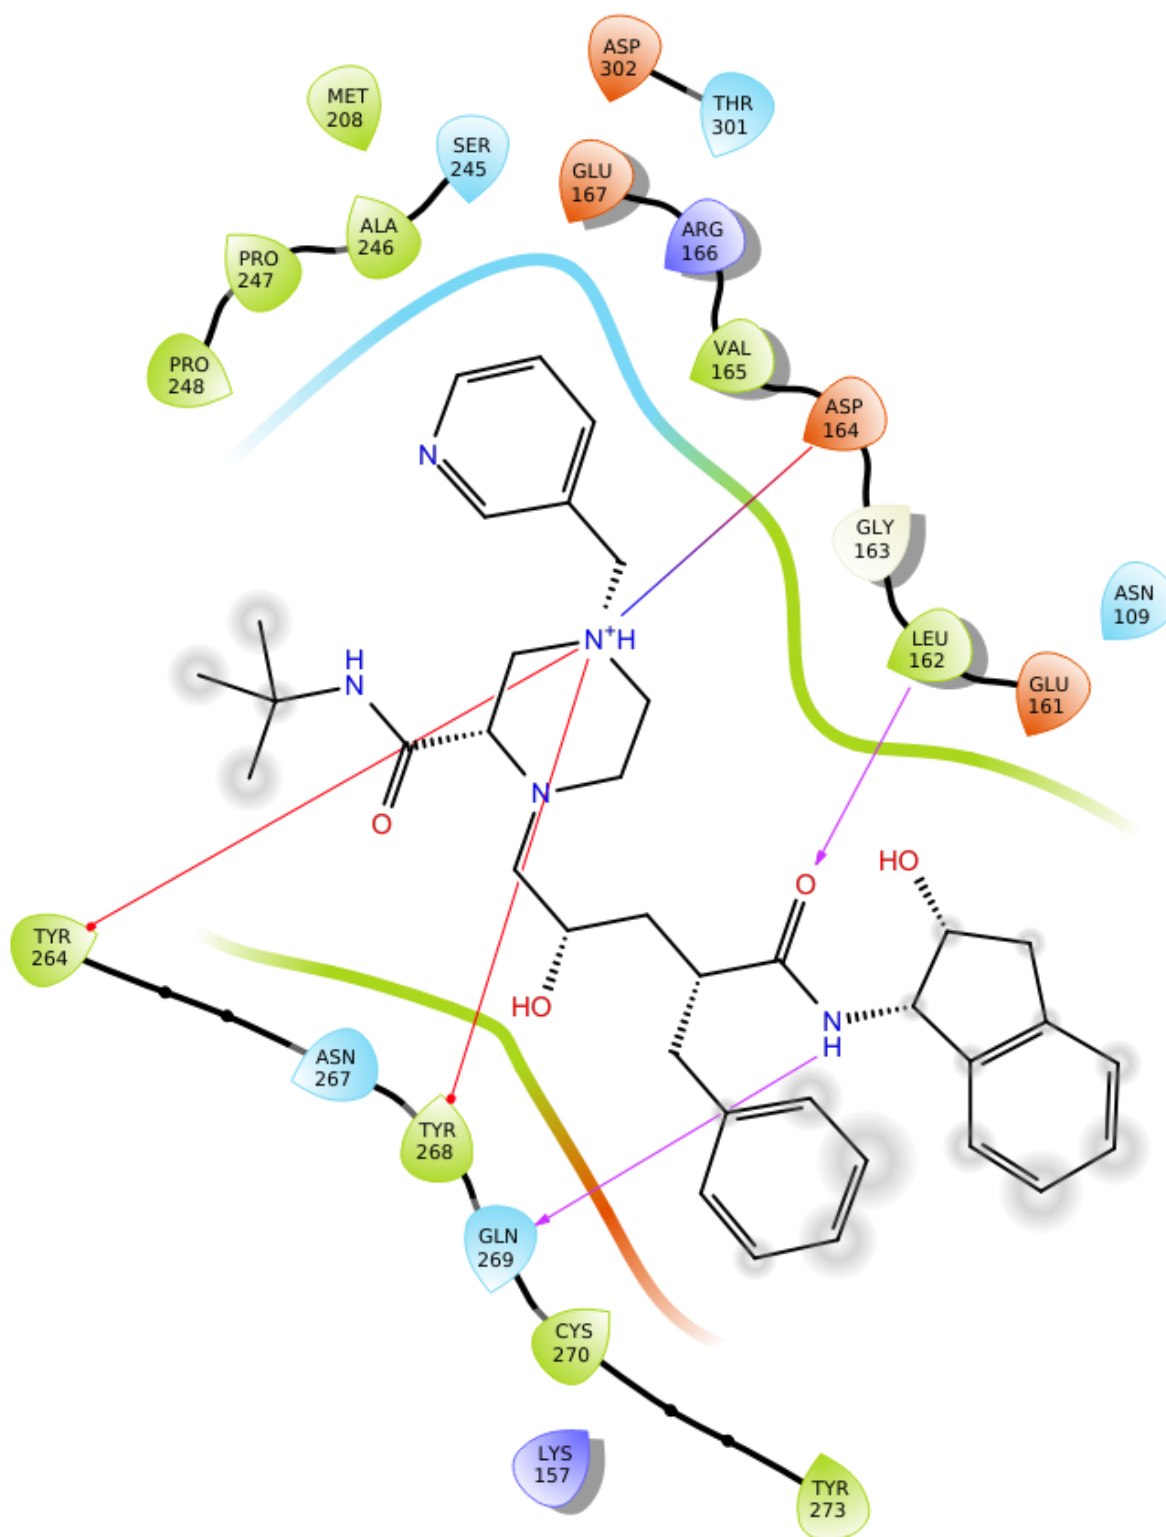

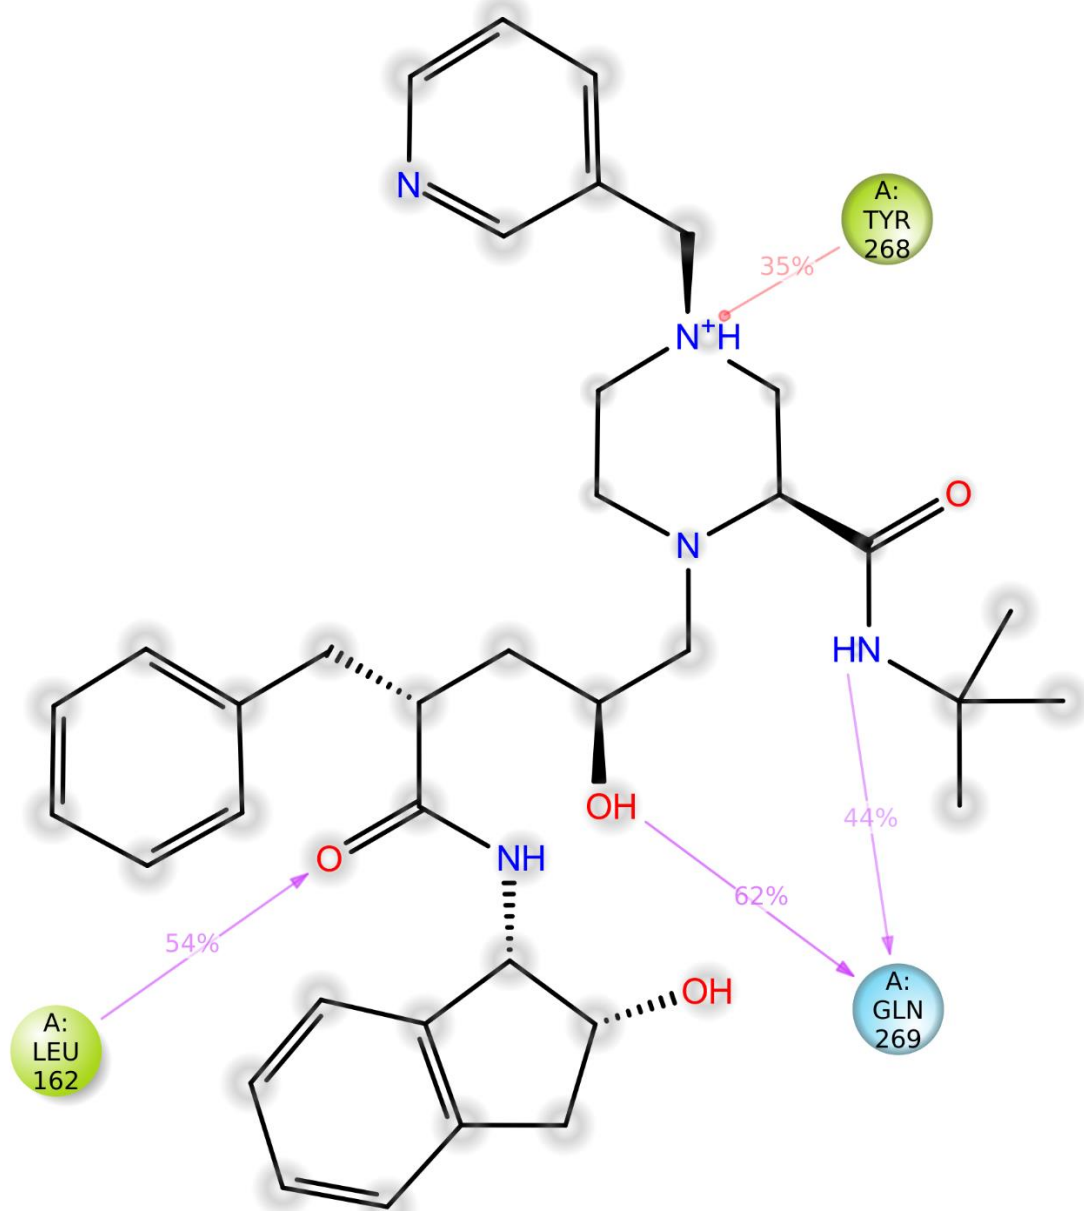



# Lopinavir in C111

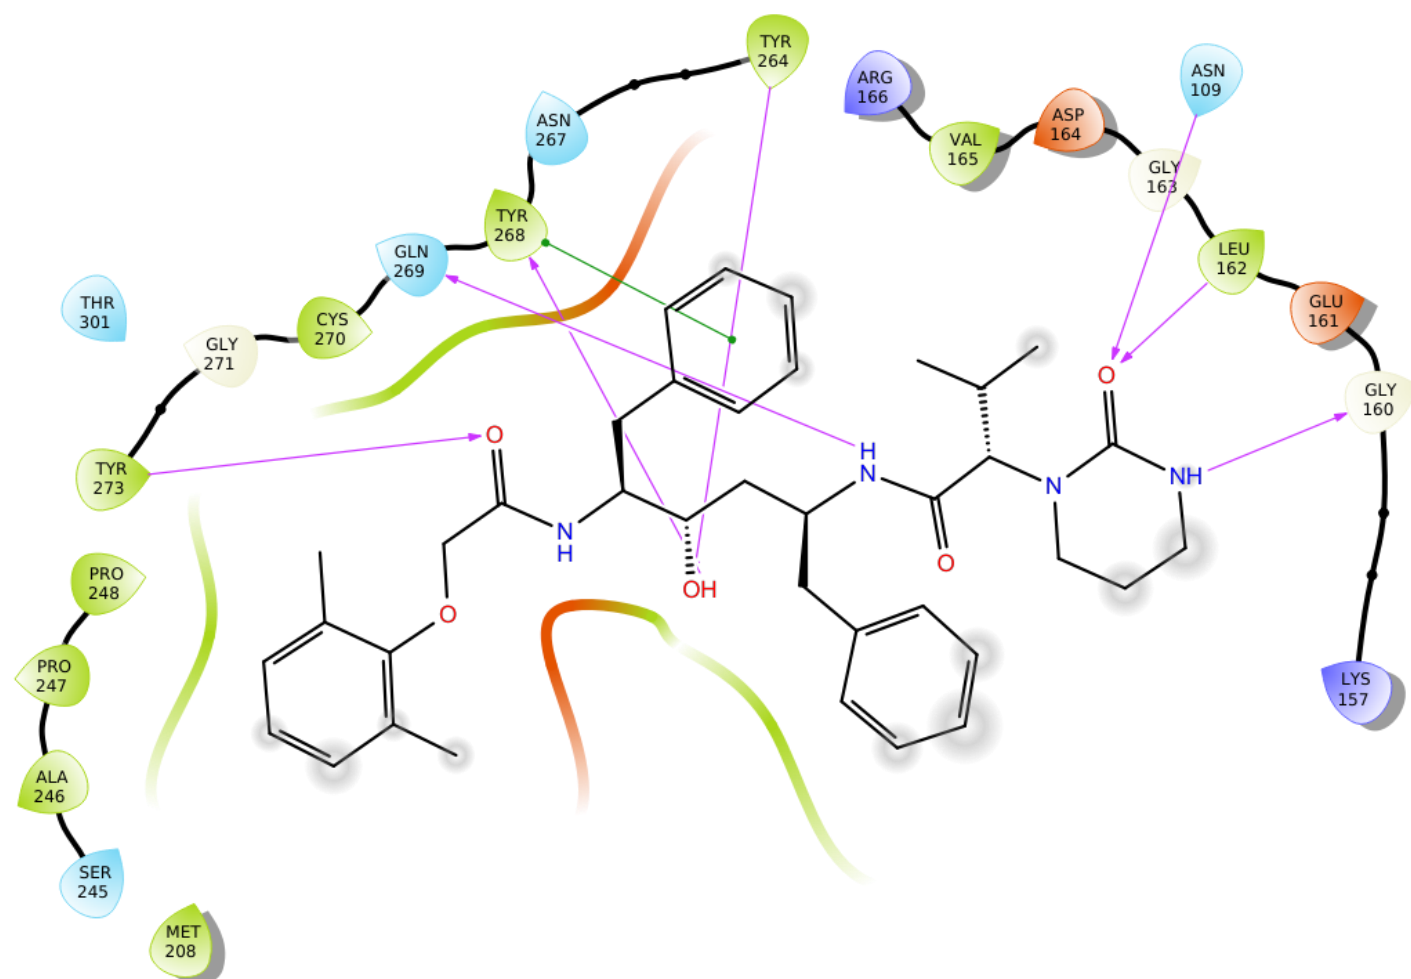

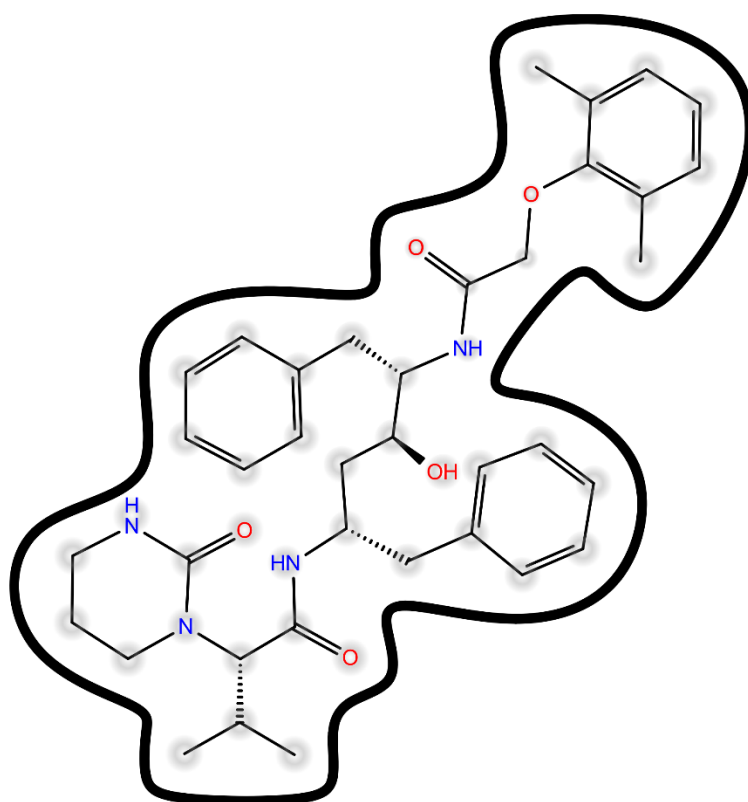

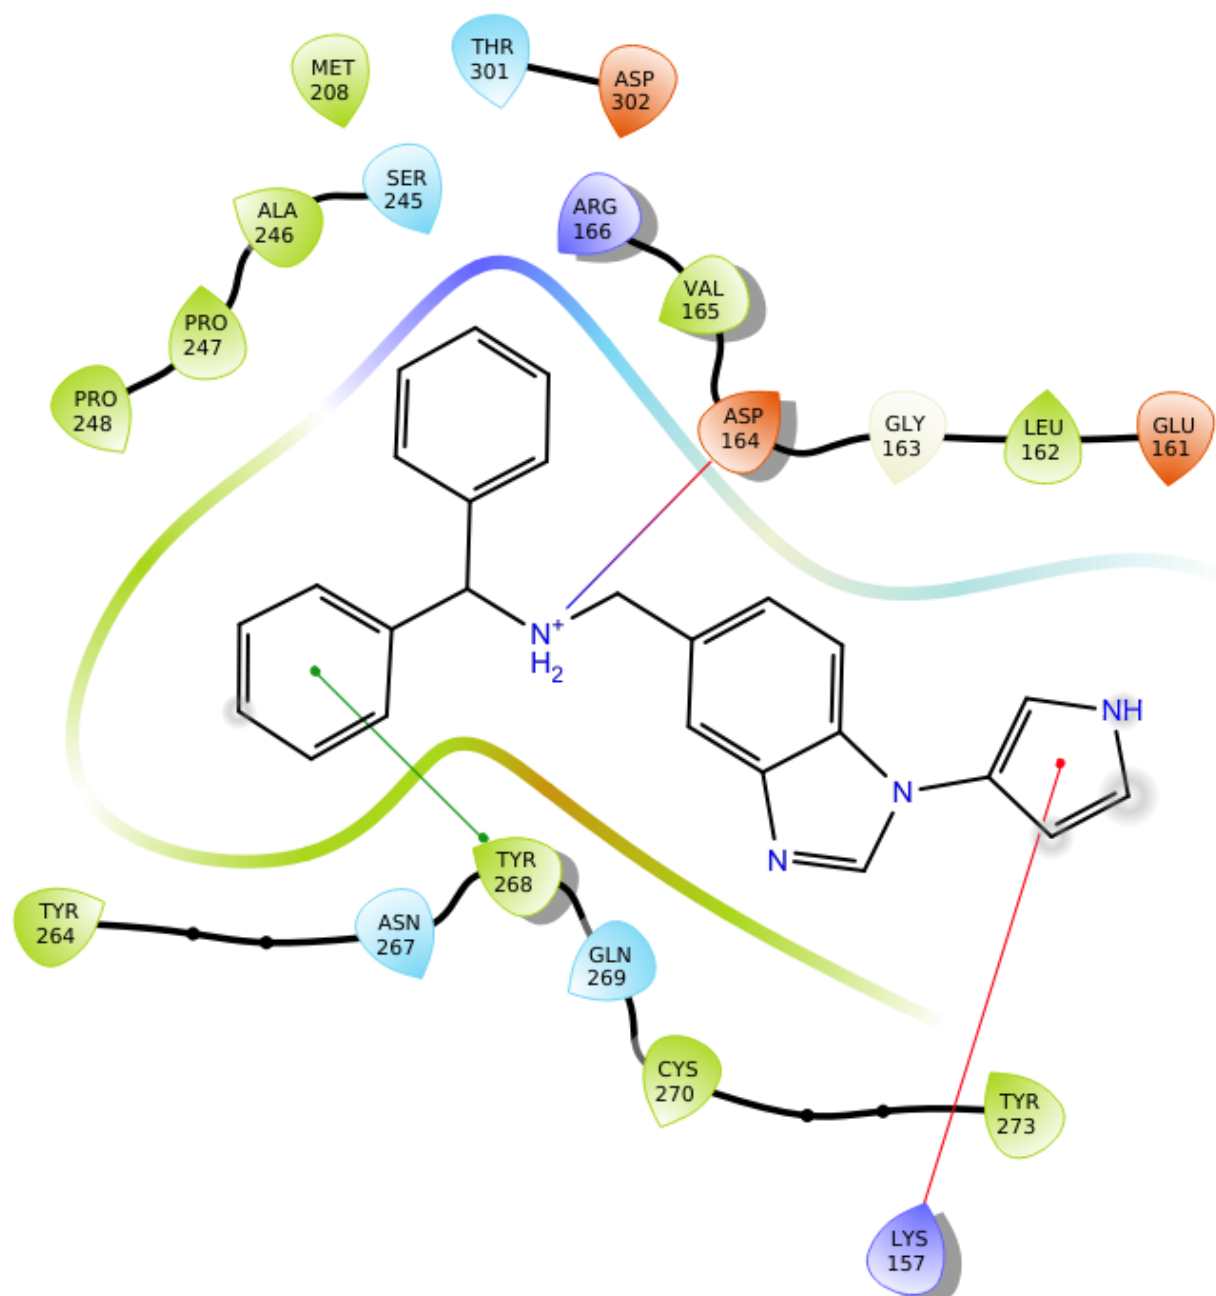

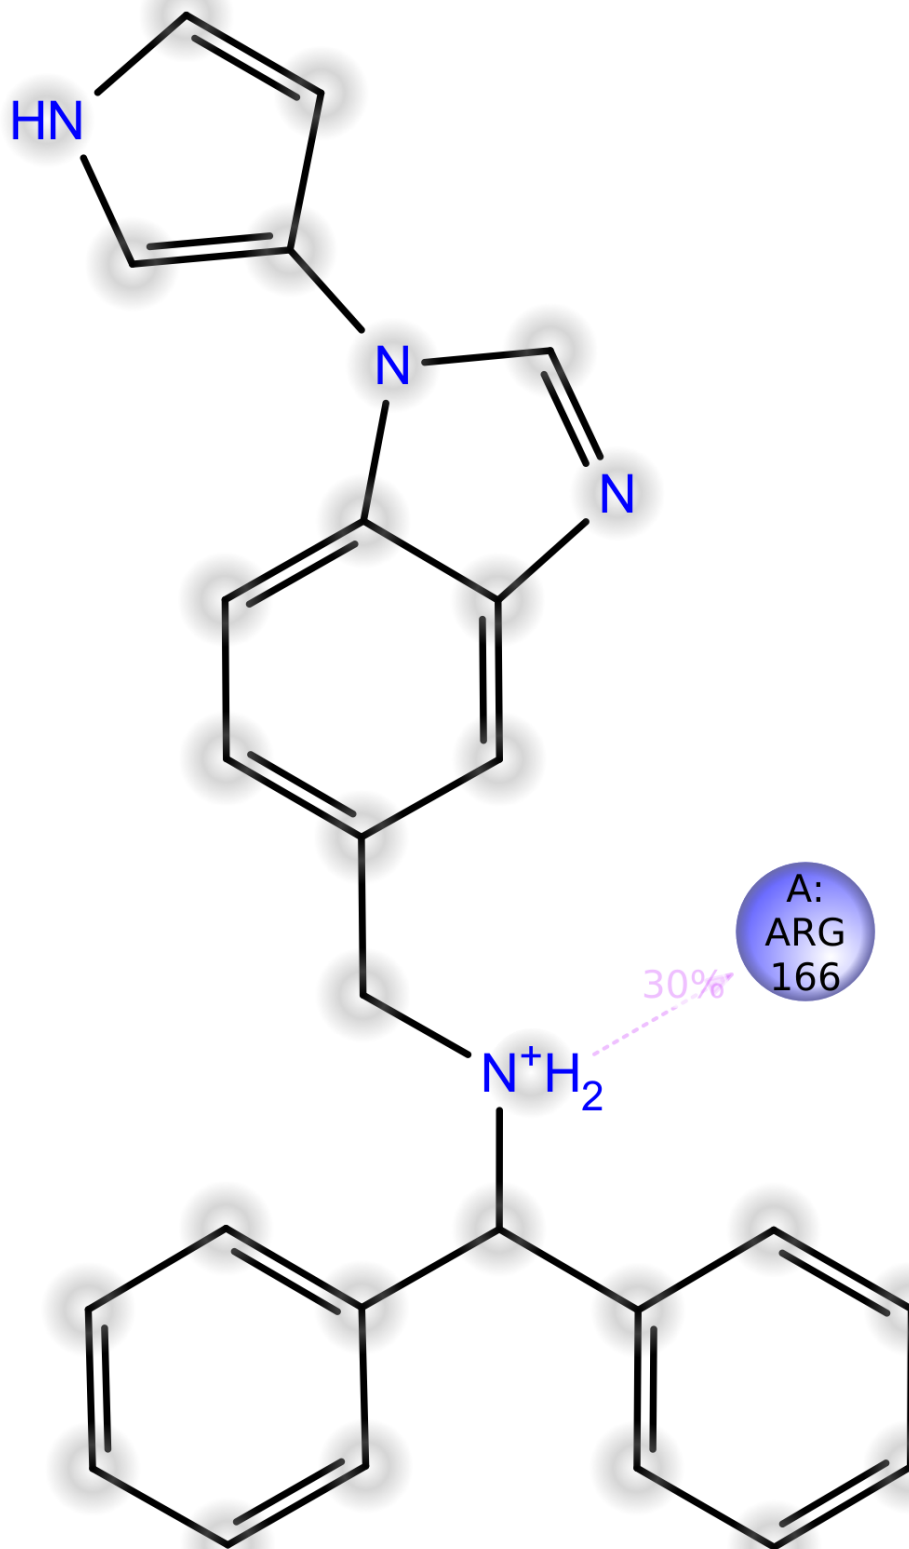

Compound Pred13 in C111

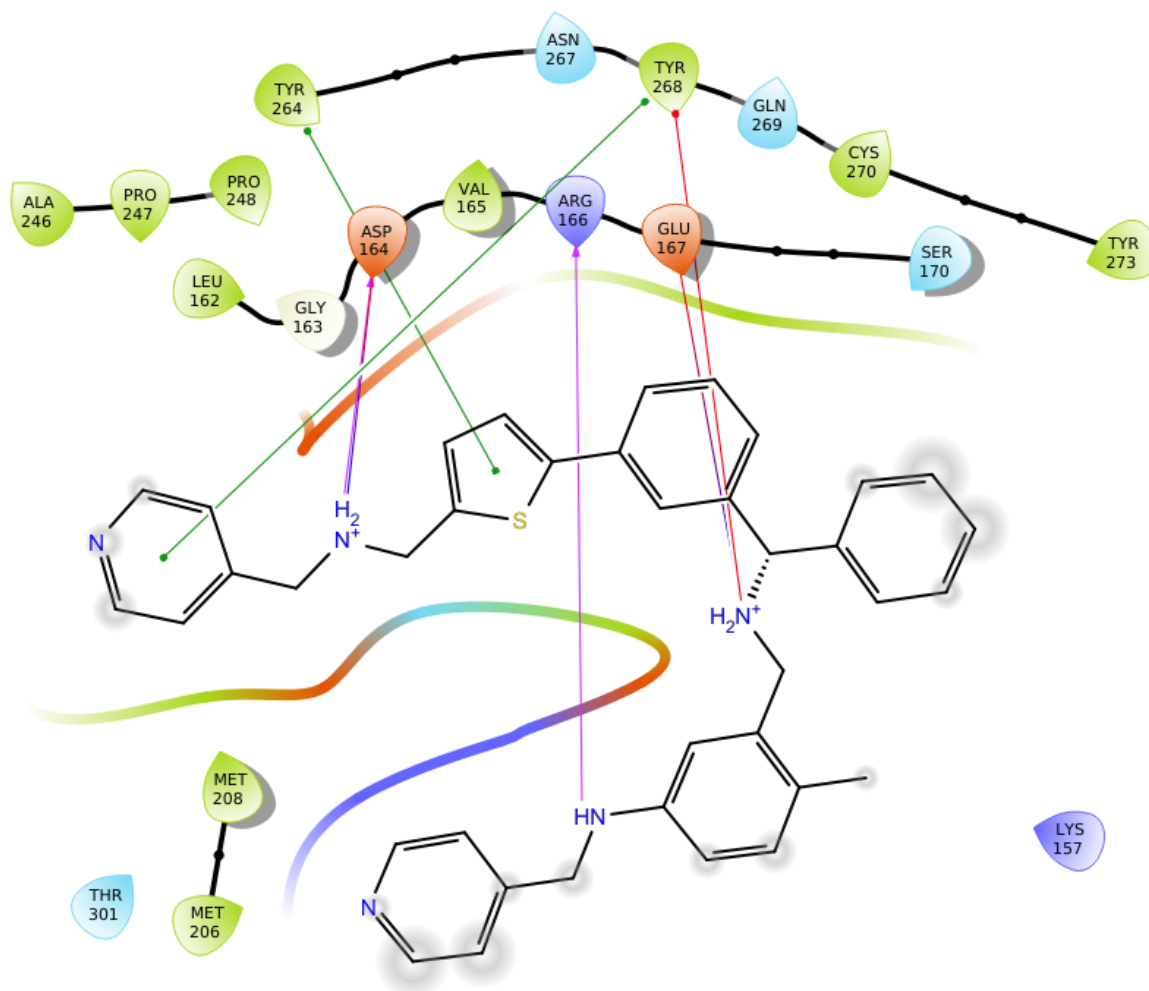

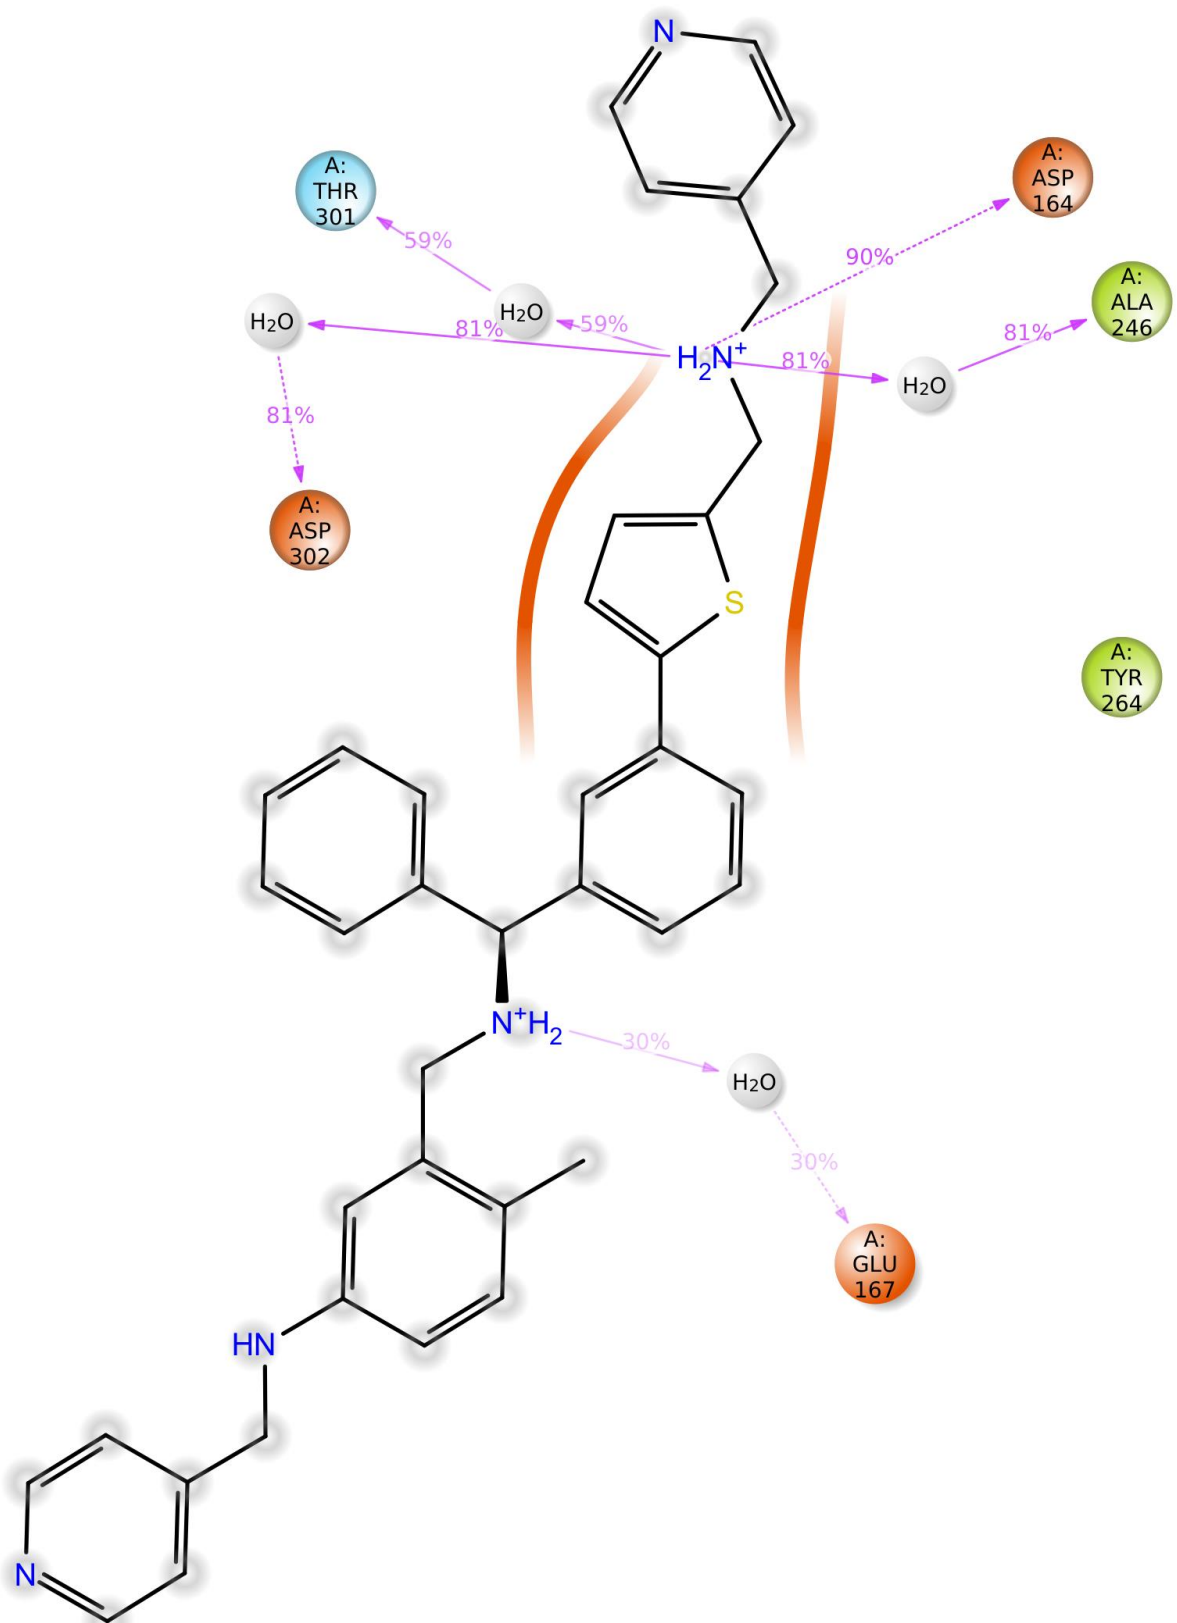

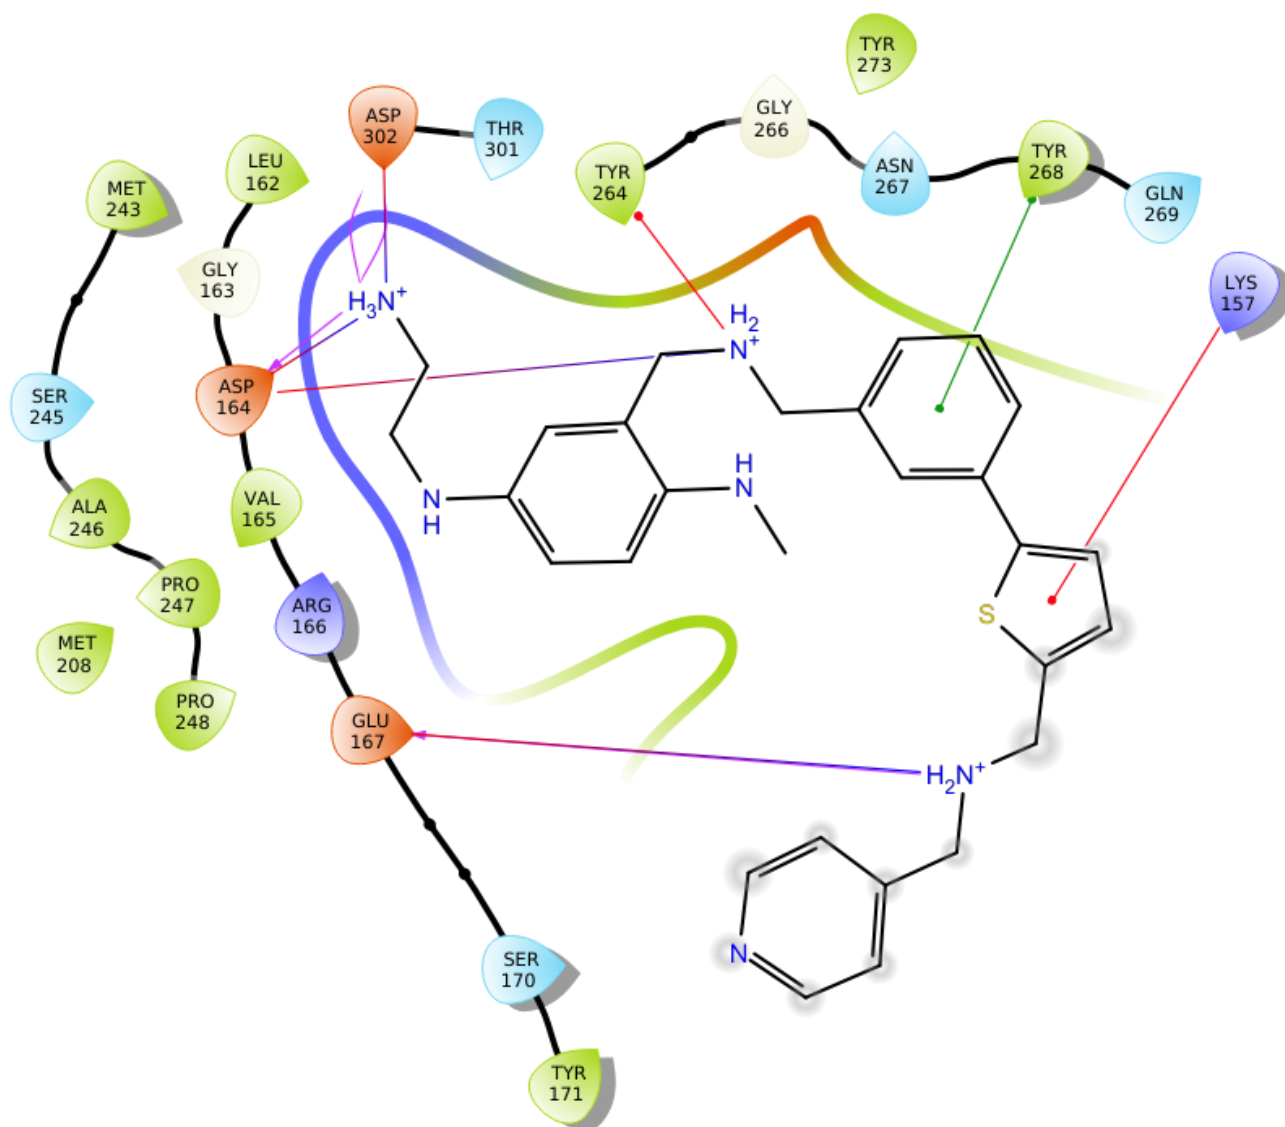

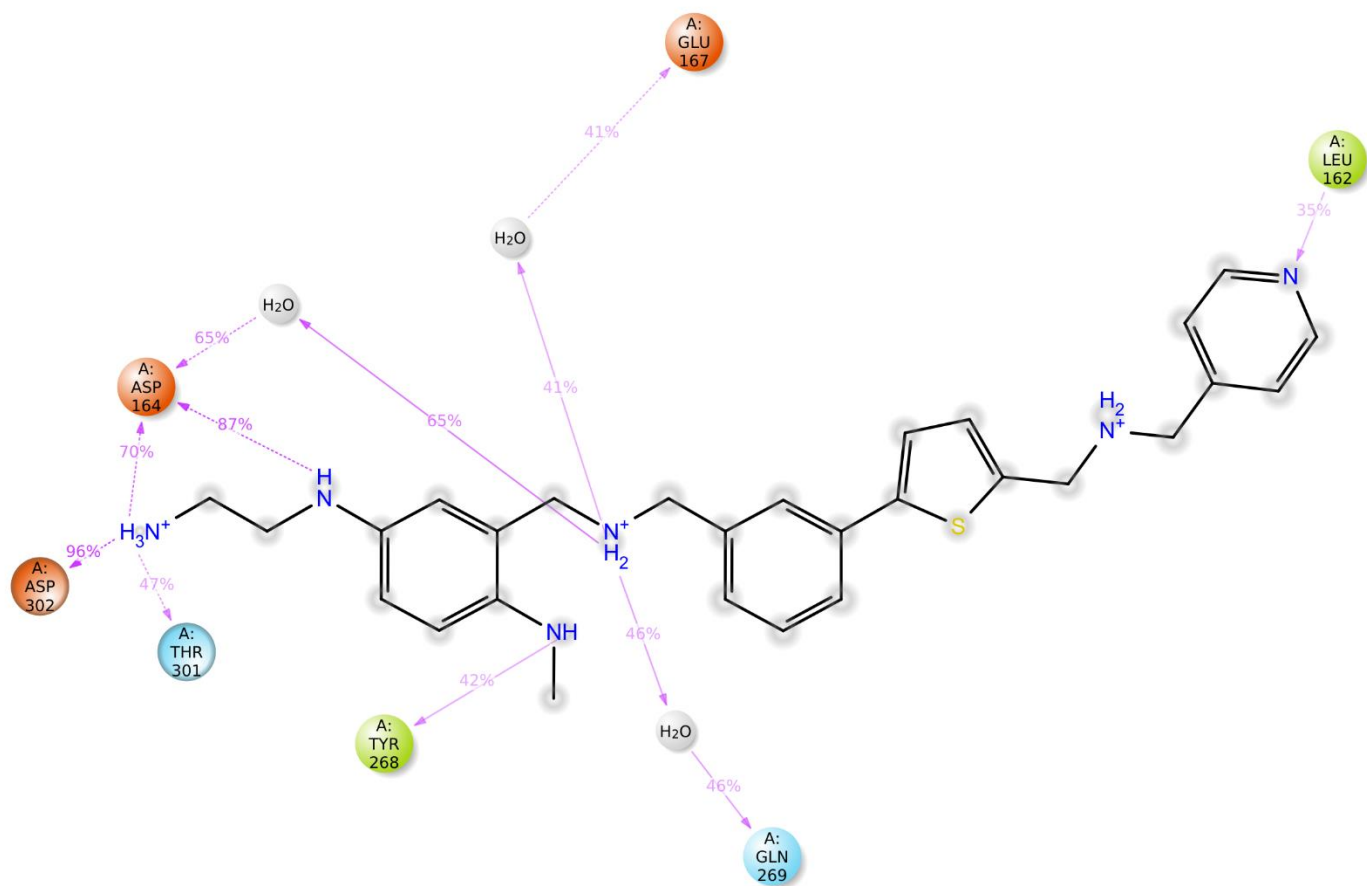



Compound Pred15 in C111

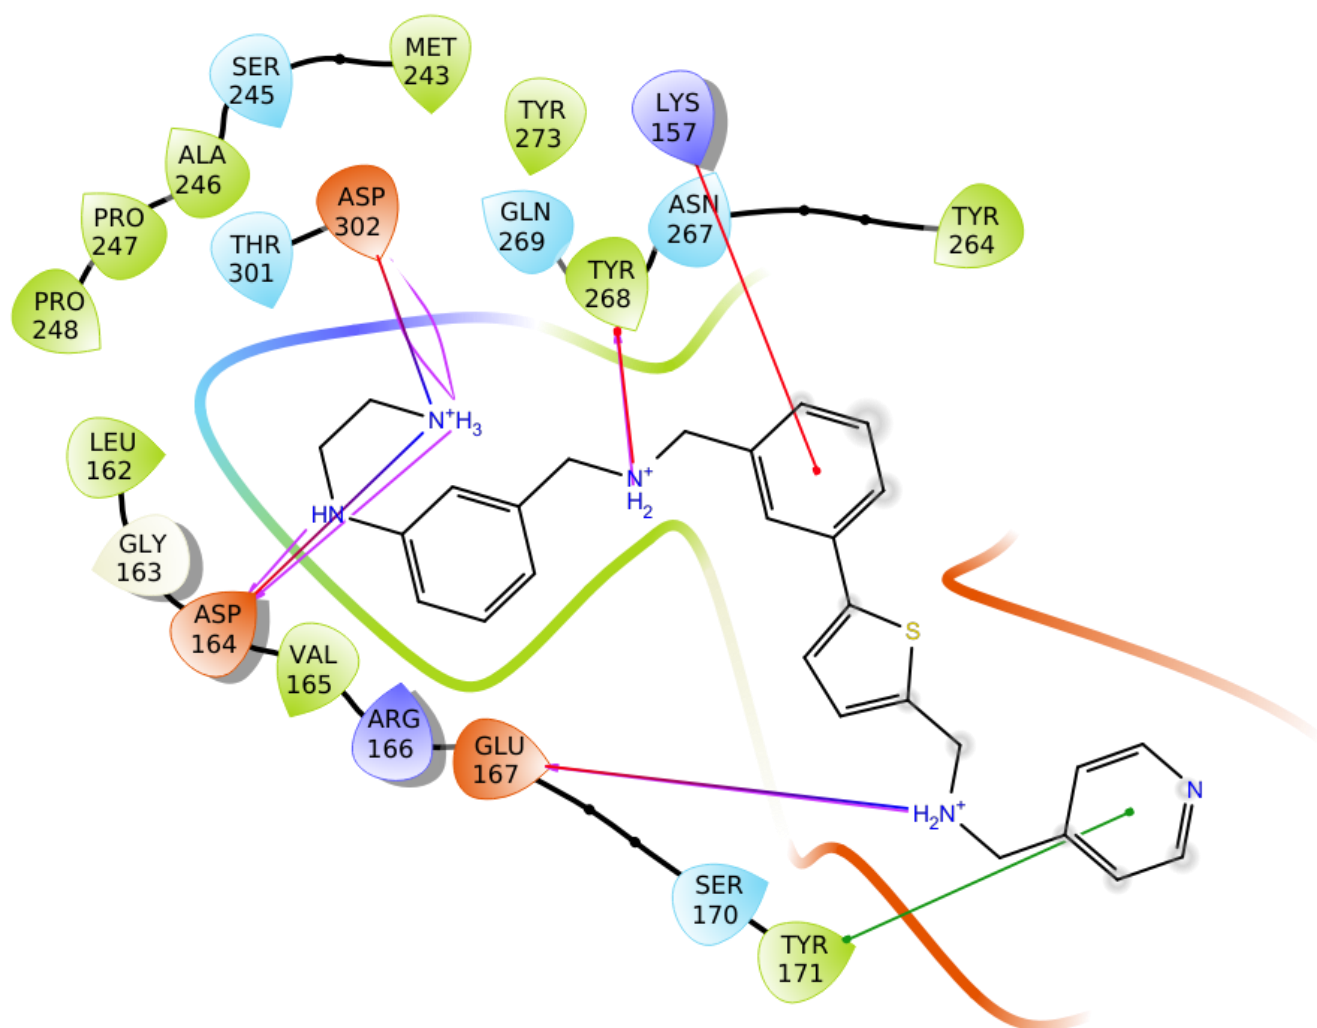

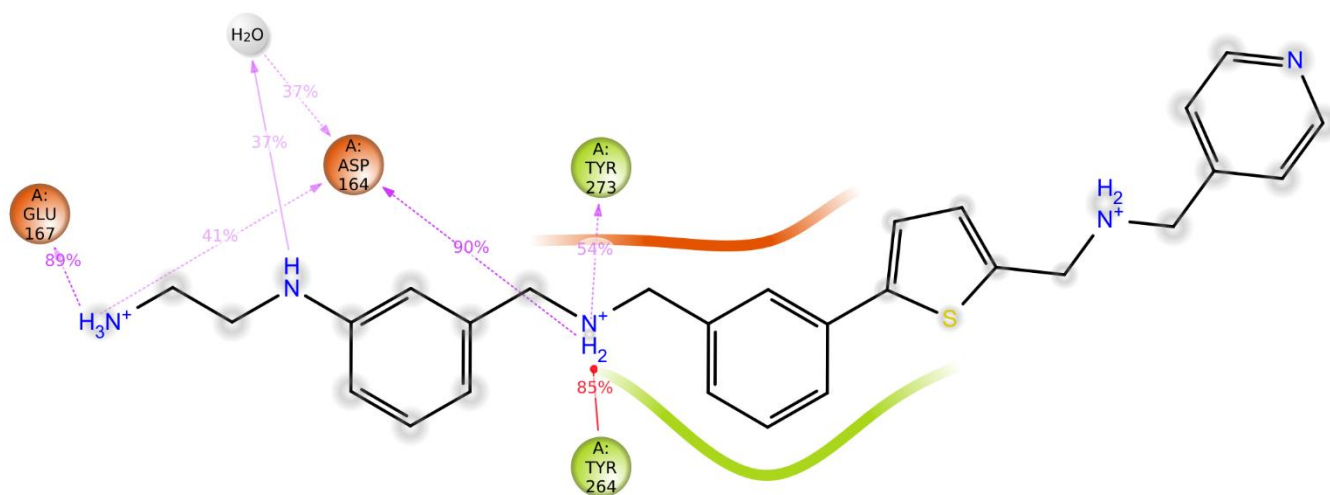

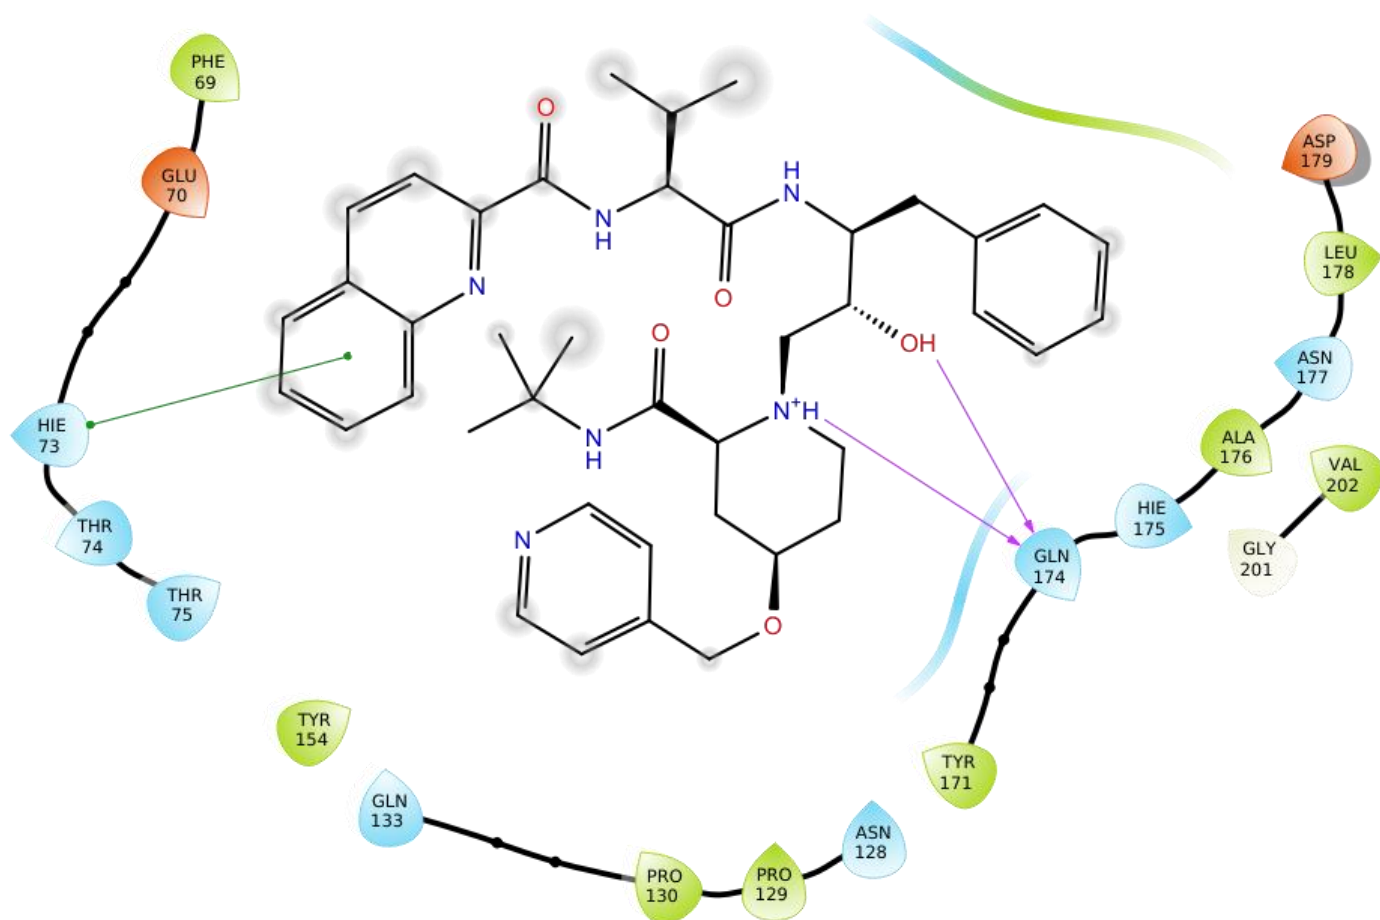

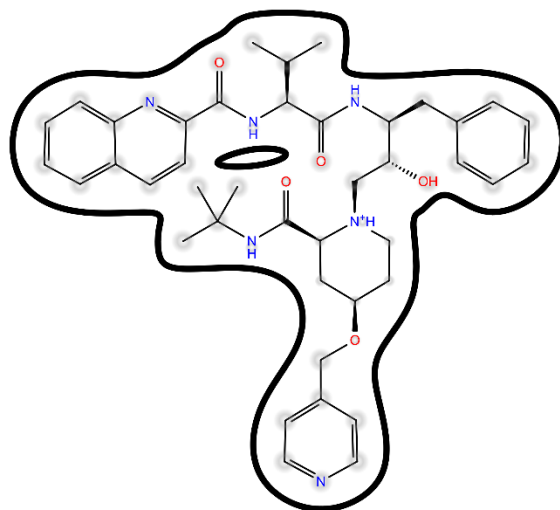

Indinavir in H73 (State of protonation 1)

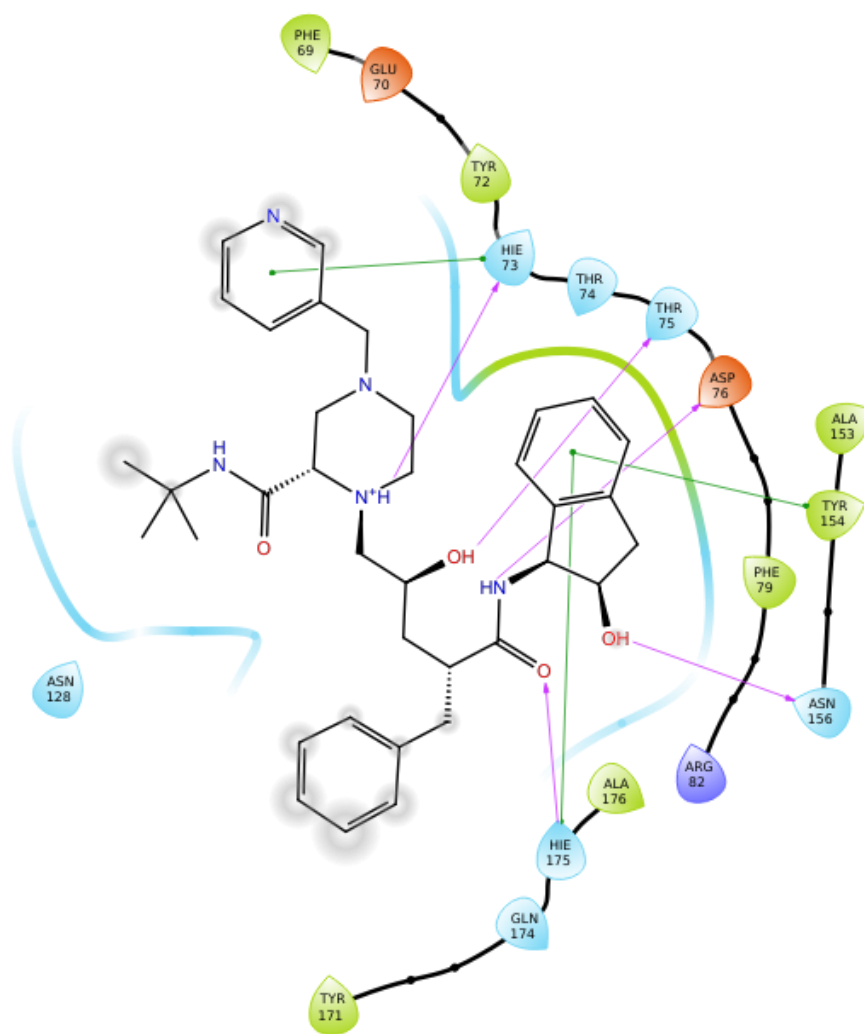

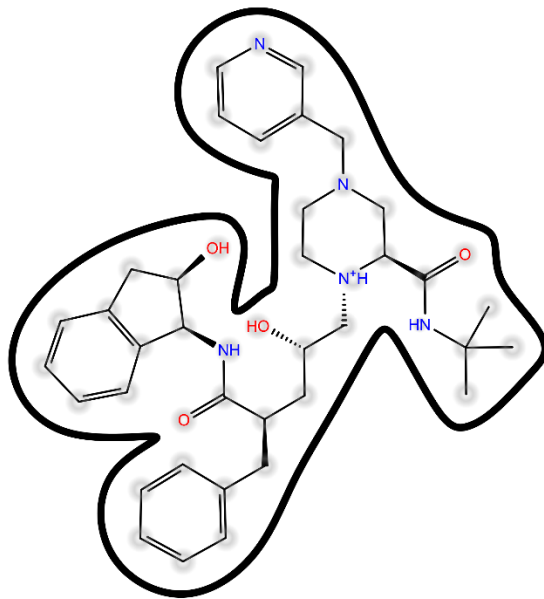

Indinavir in H73 (State of protonation 2)

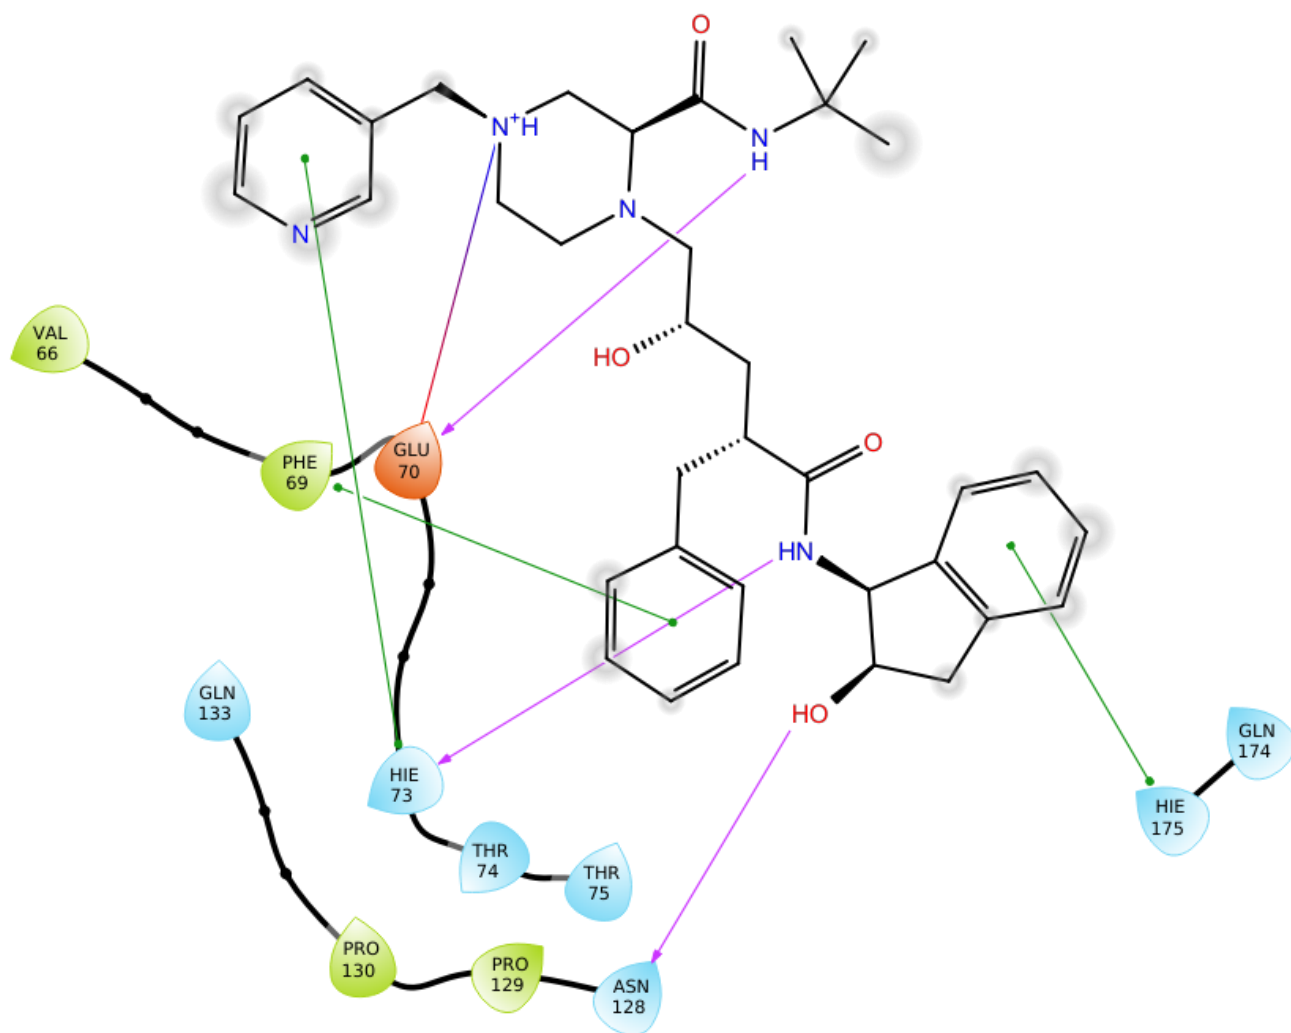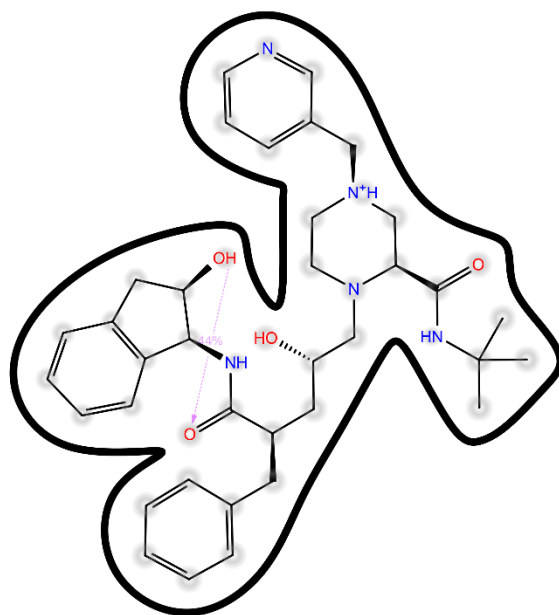

# Atazanivir in H73

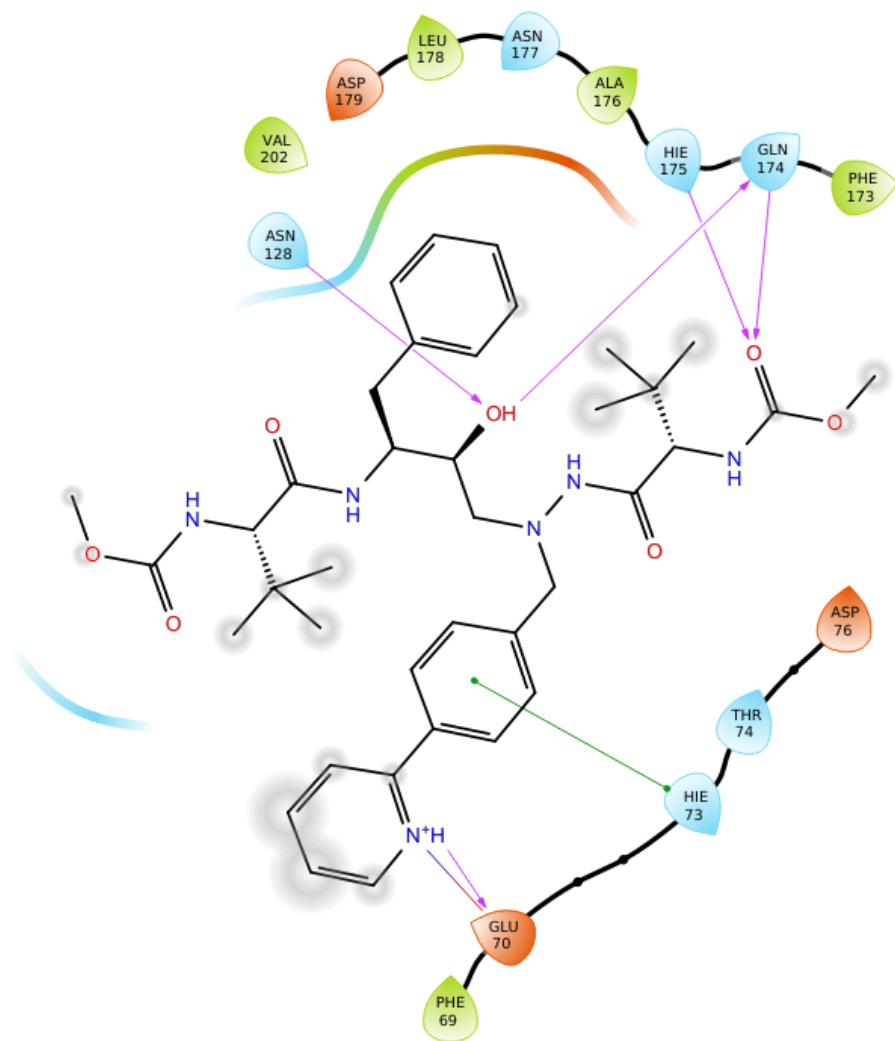



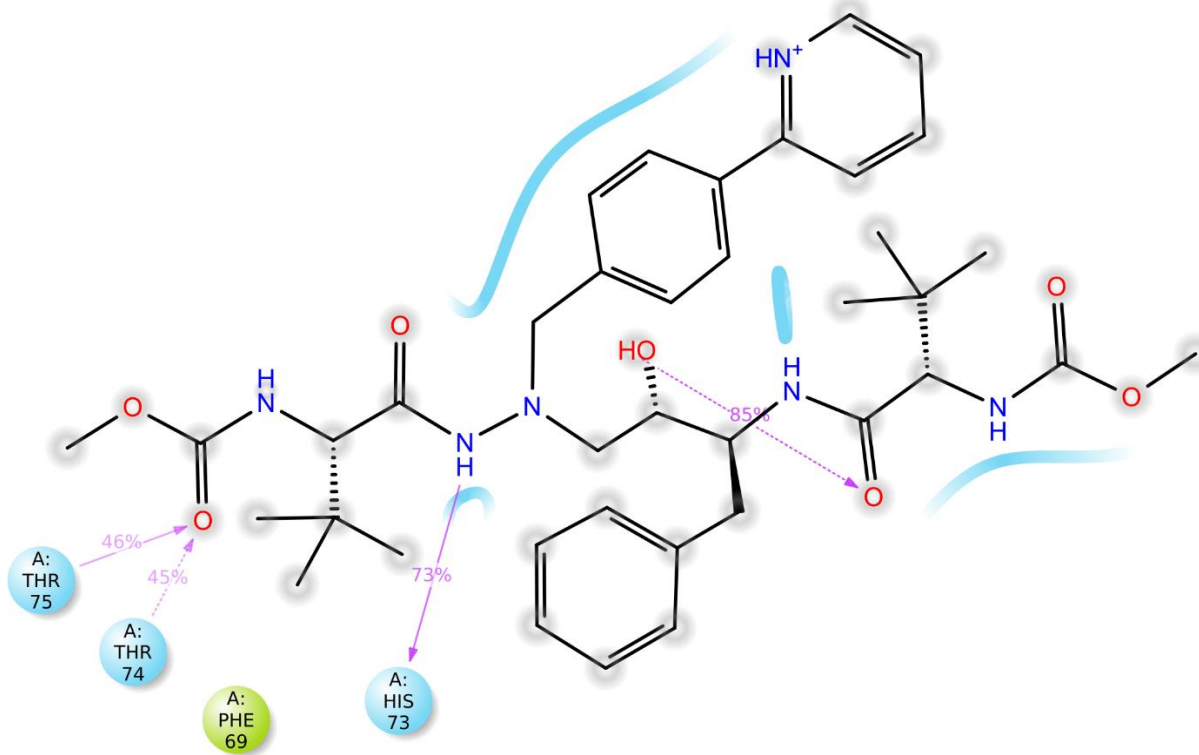

Compound Pred10 in H73

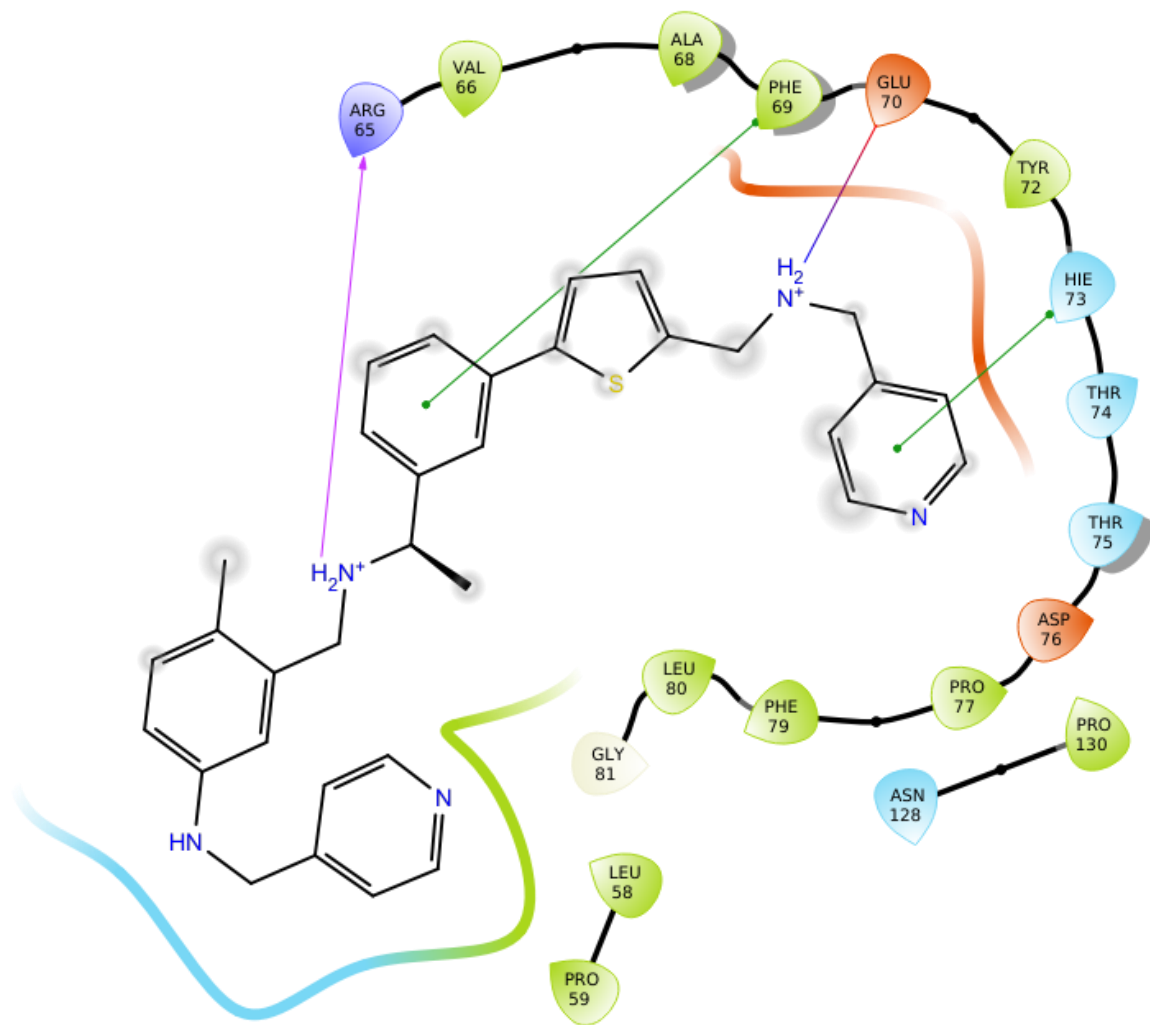

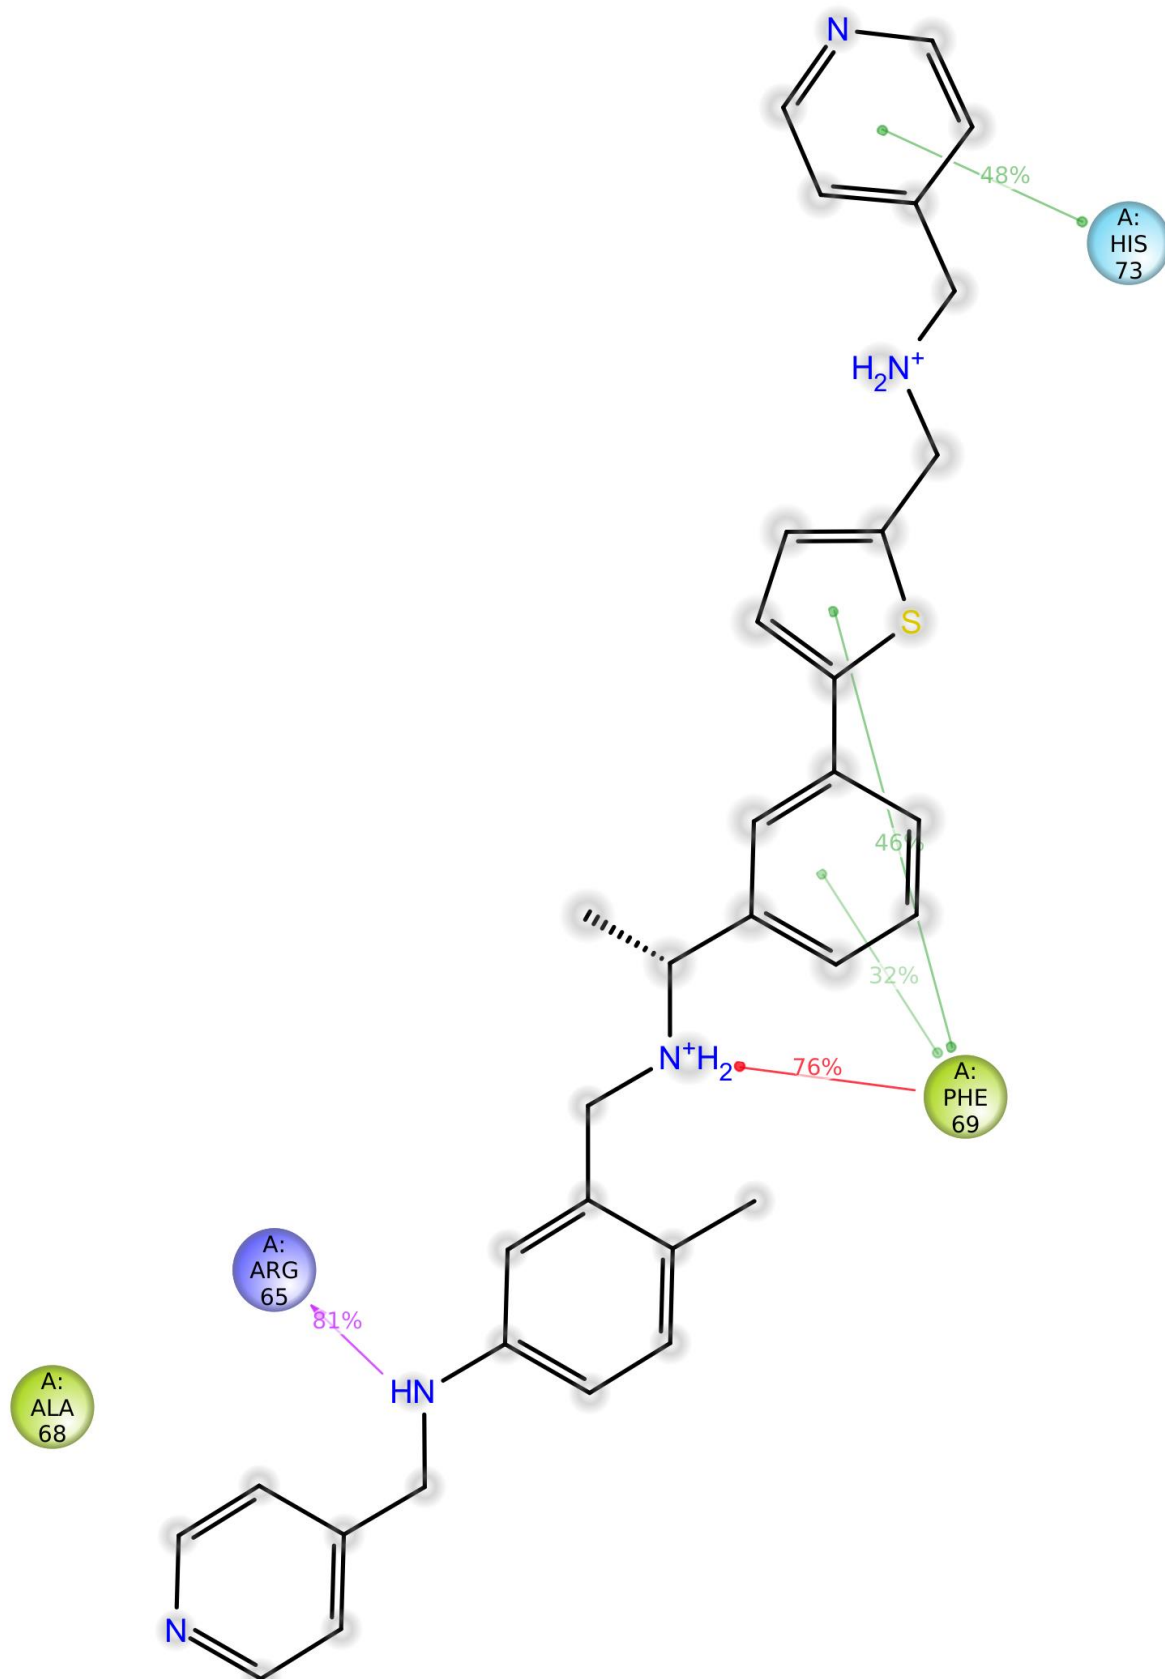

Compound Pred14 in H73

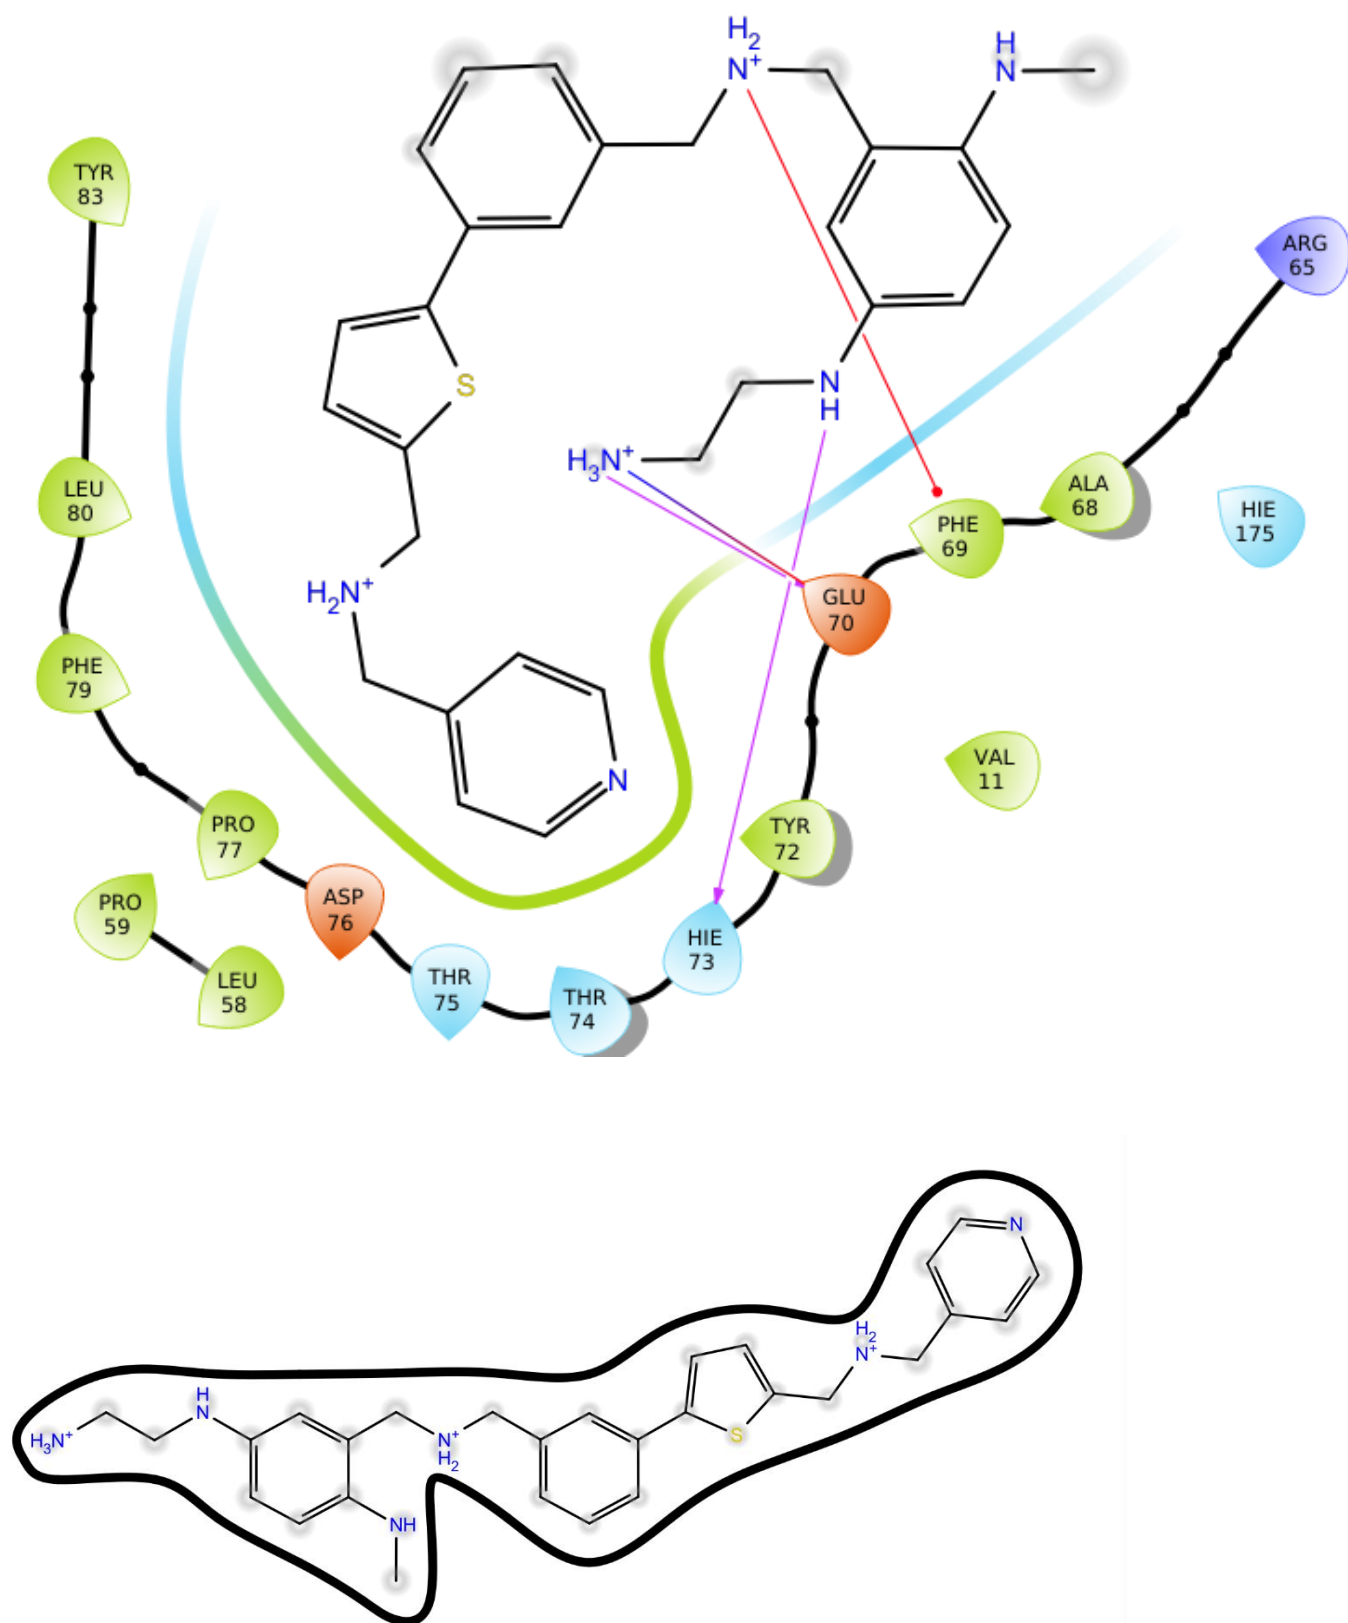

Compound Pred 15 in H73

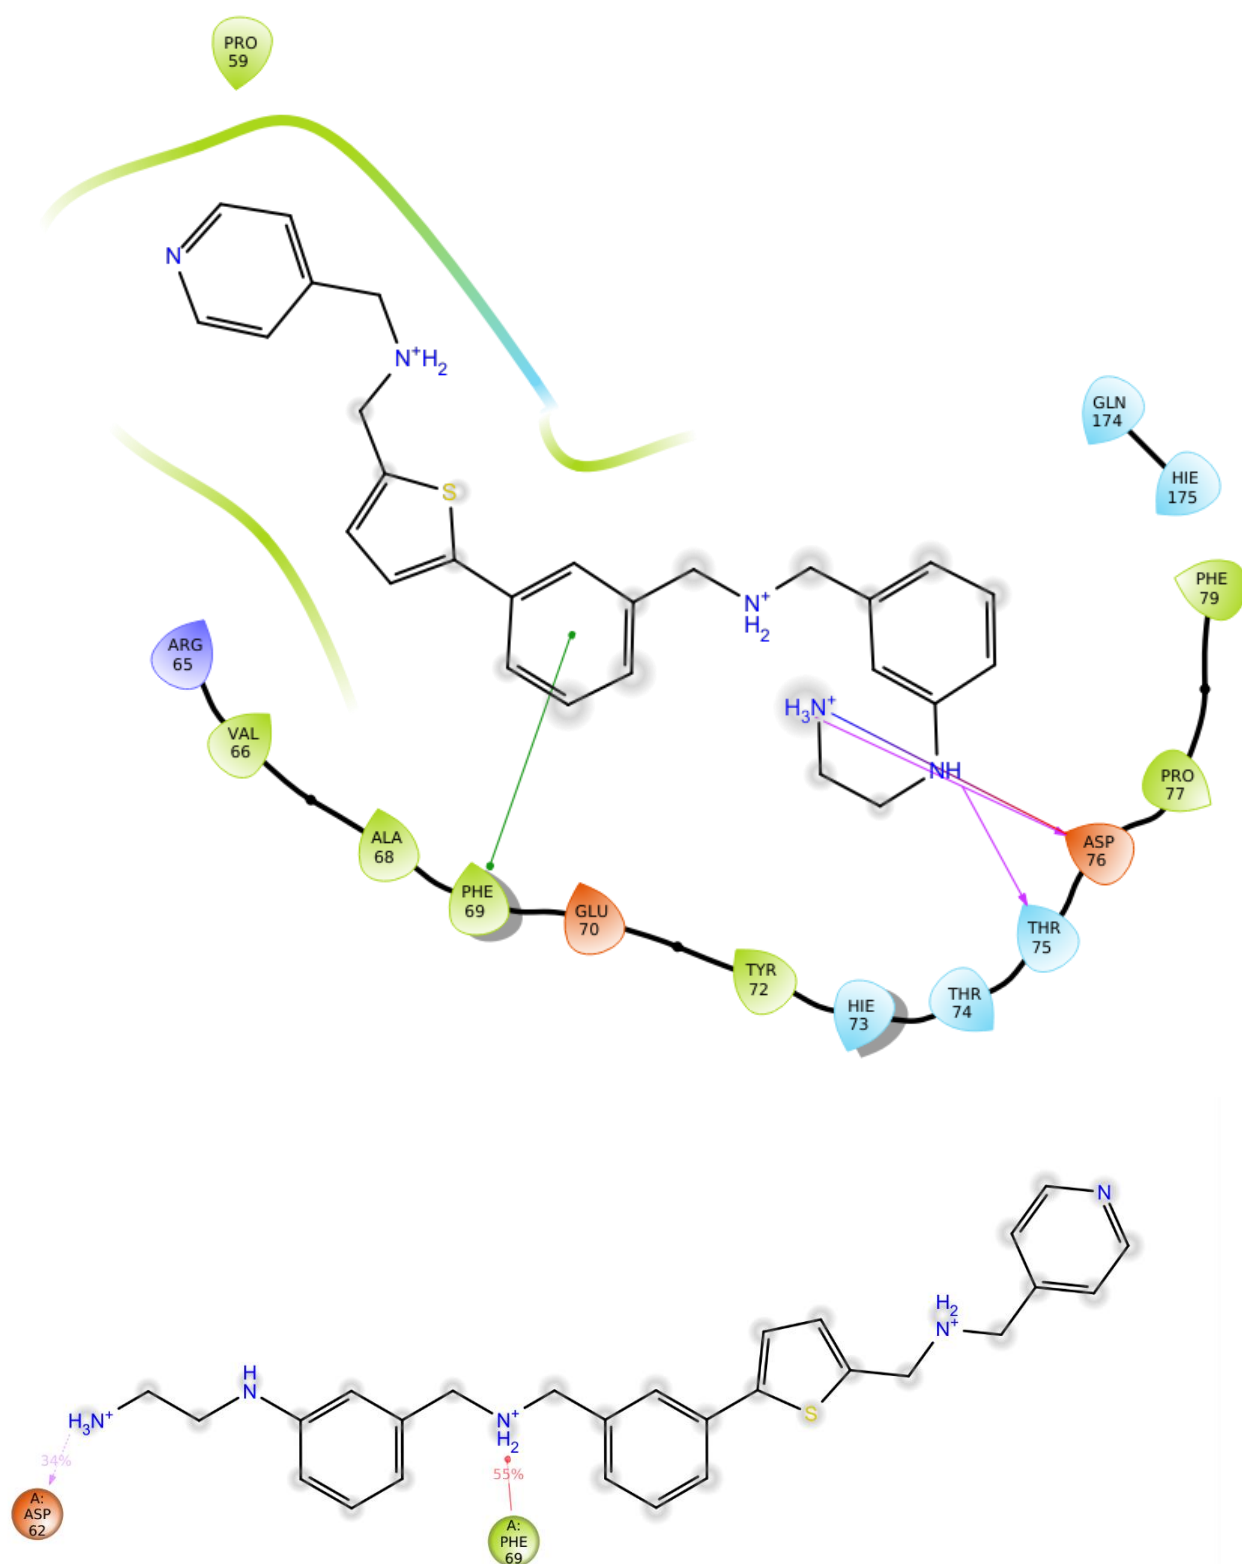

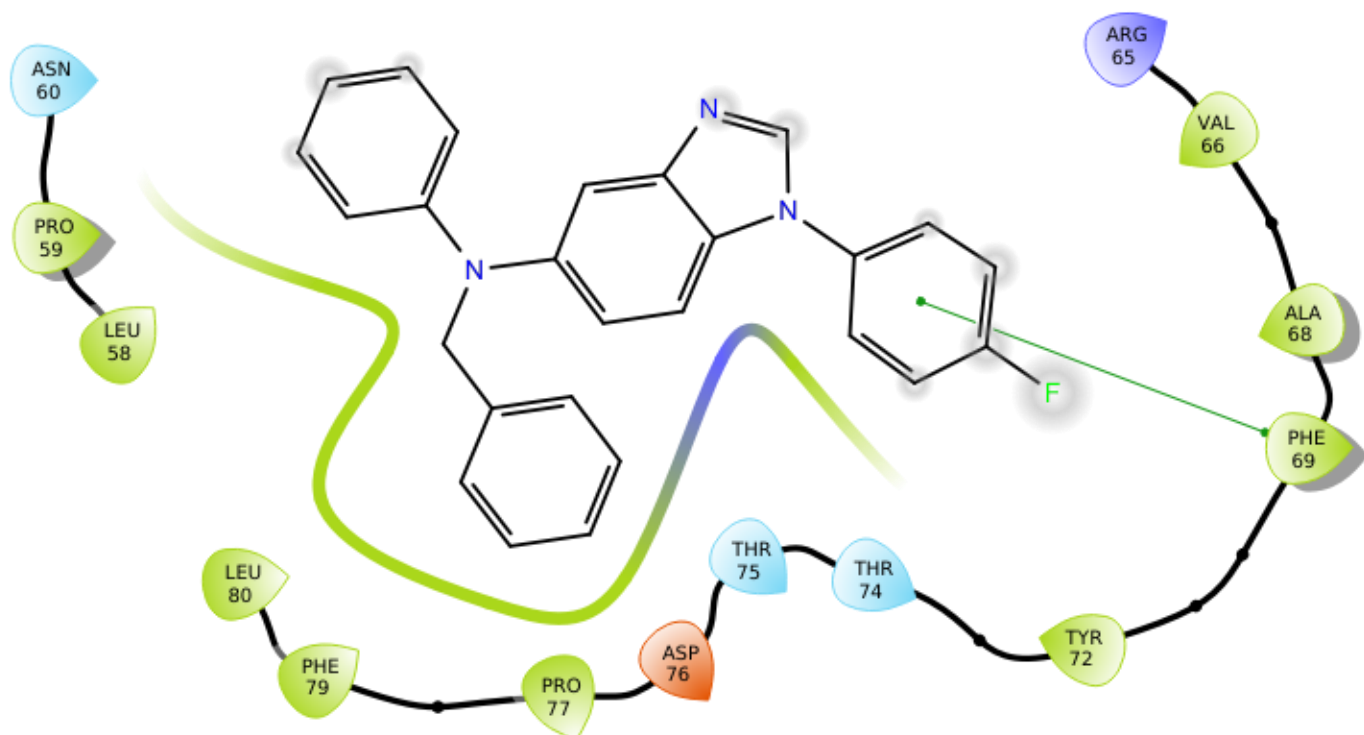

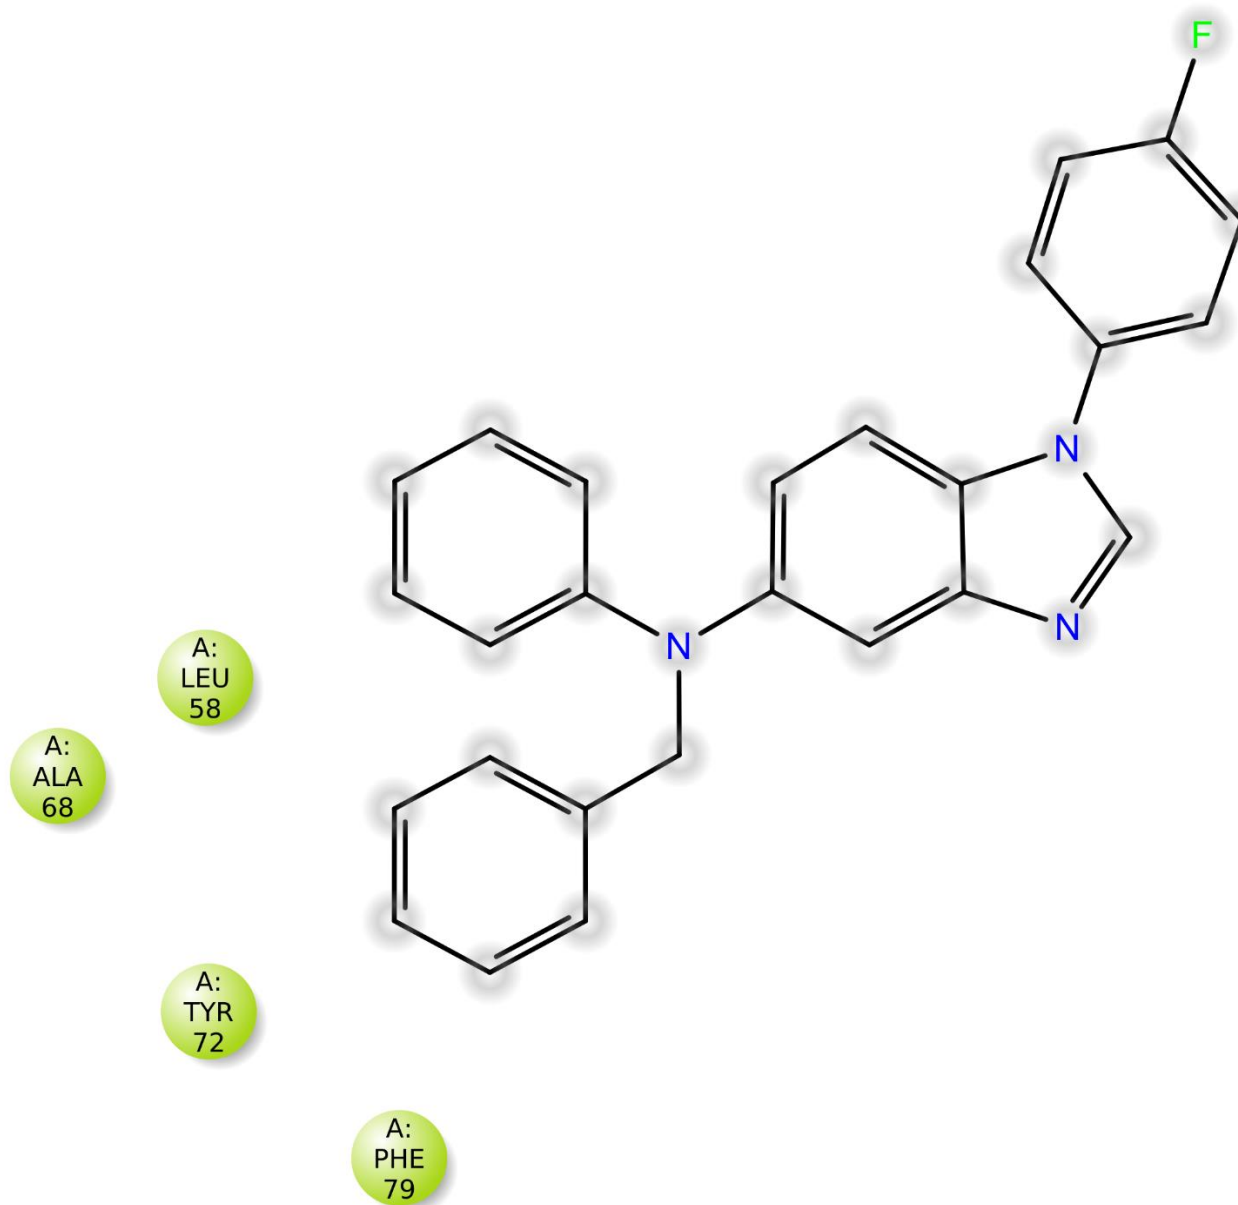

**Figure S2.** The RMSD of the antivirals and designed molecules.

The RMSD of Indinavir in Y268 (State of protonation 1)

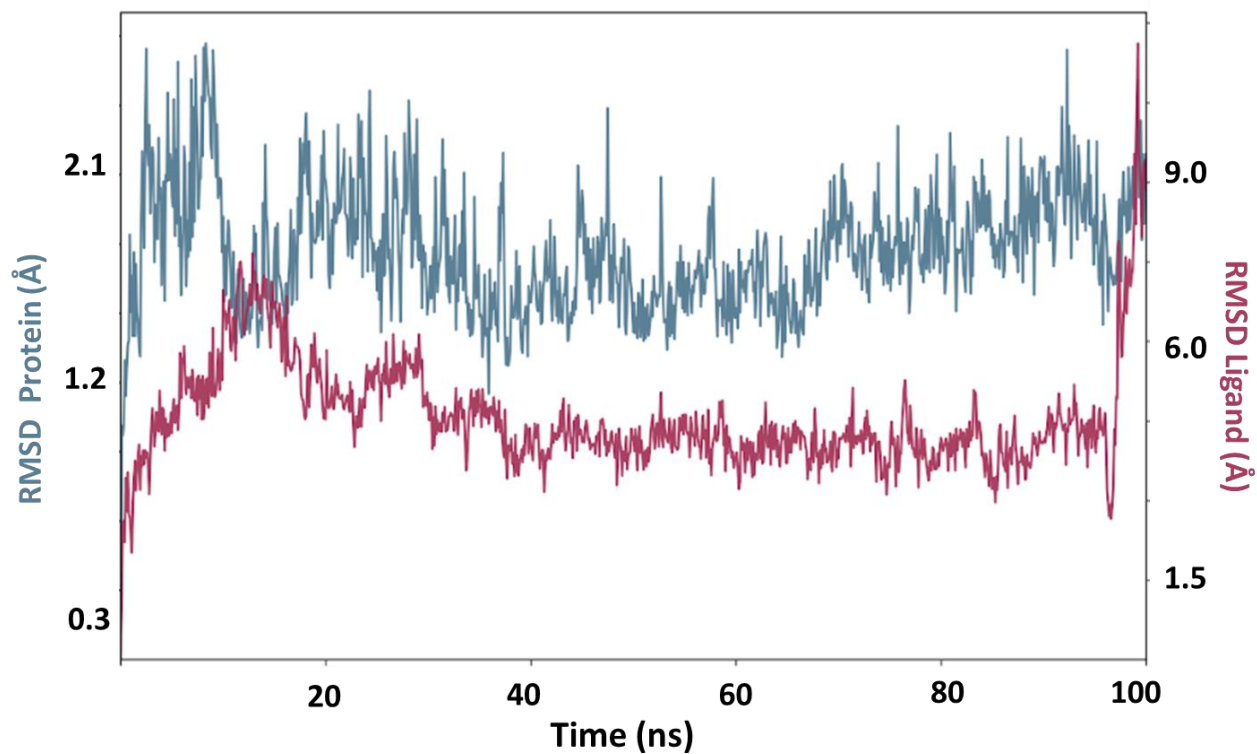

The RMSD of Indinavir in Y268 (State of protonation 2)

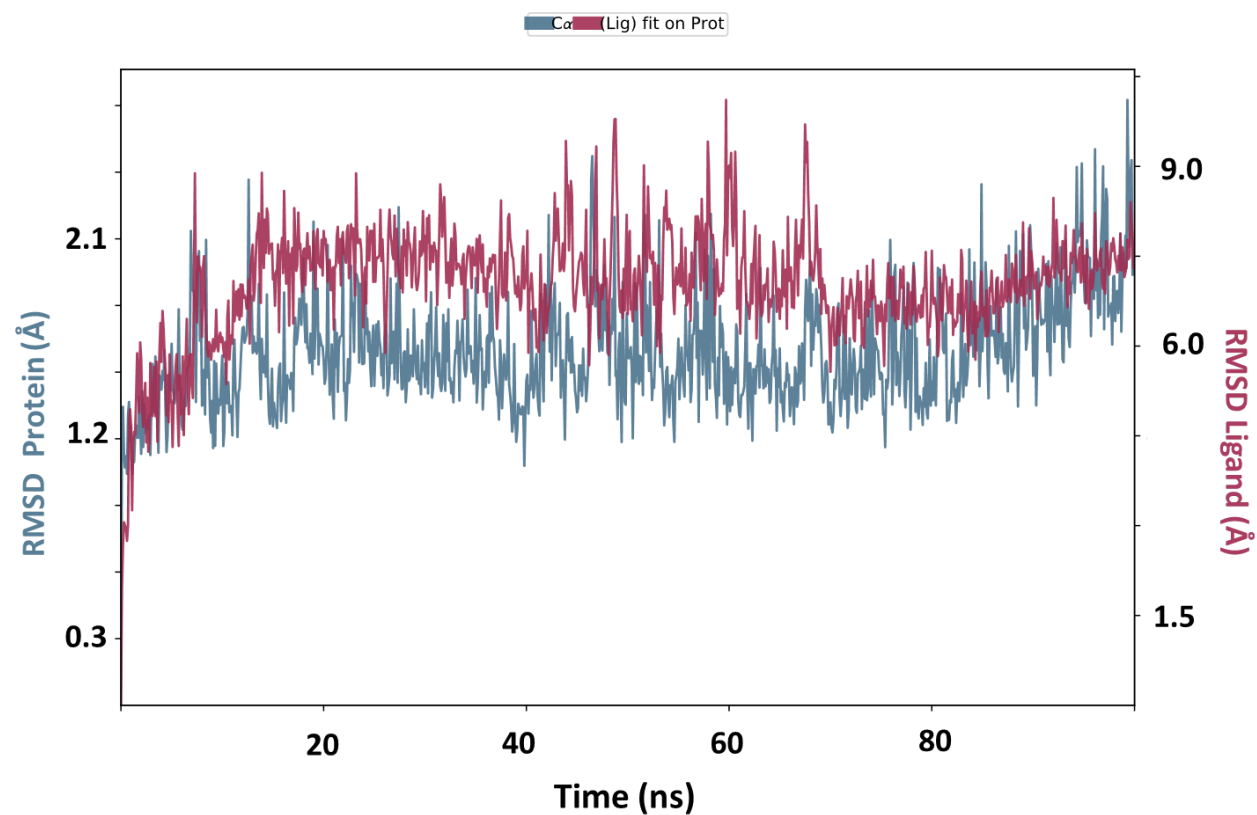



The RMSD of Etravirine in Y268

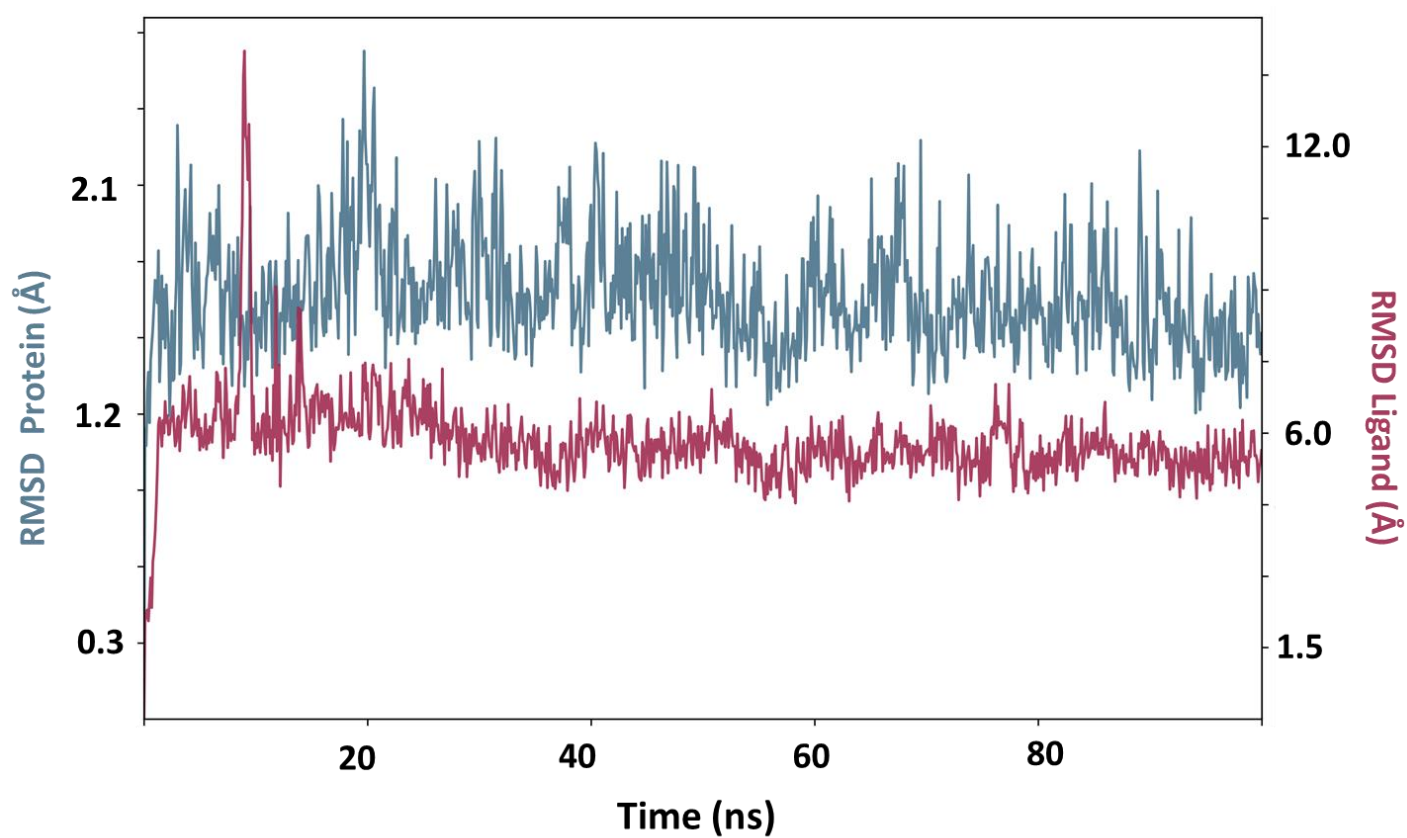

The RMSD of Palinavir in Y268

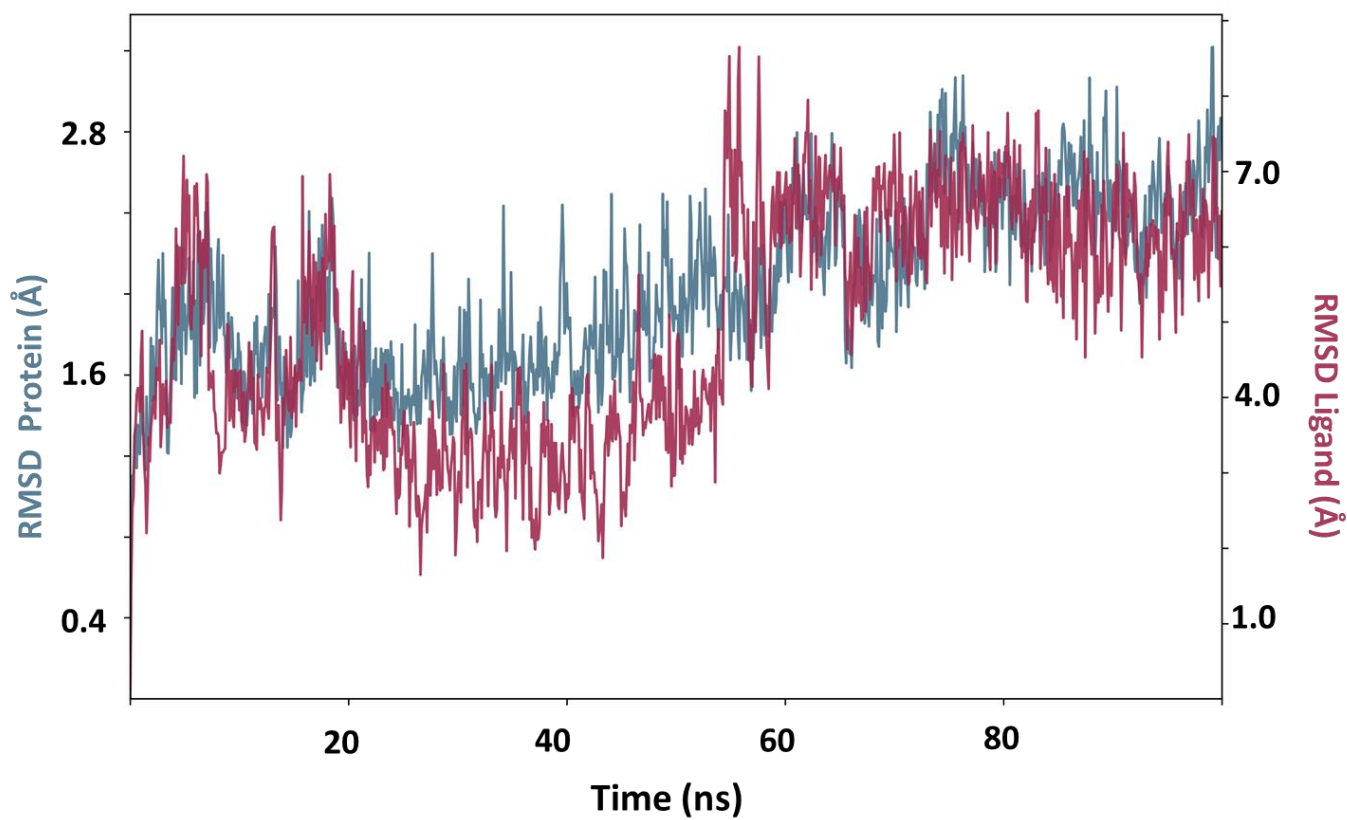

The RMSD of Lopinavir in C111

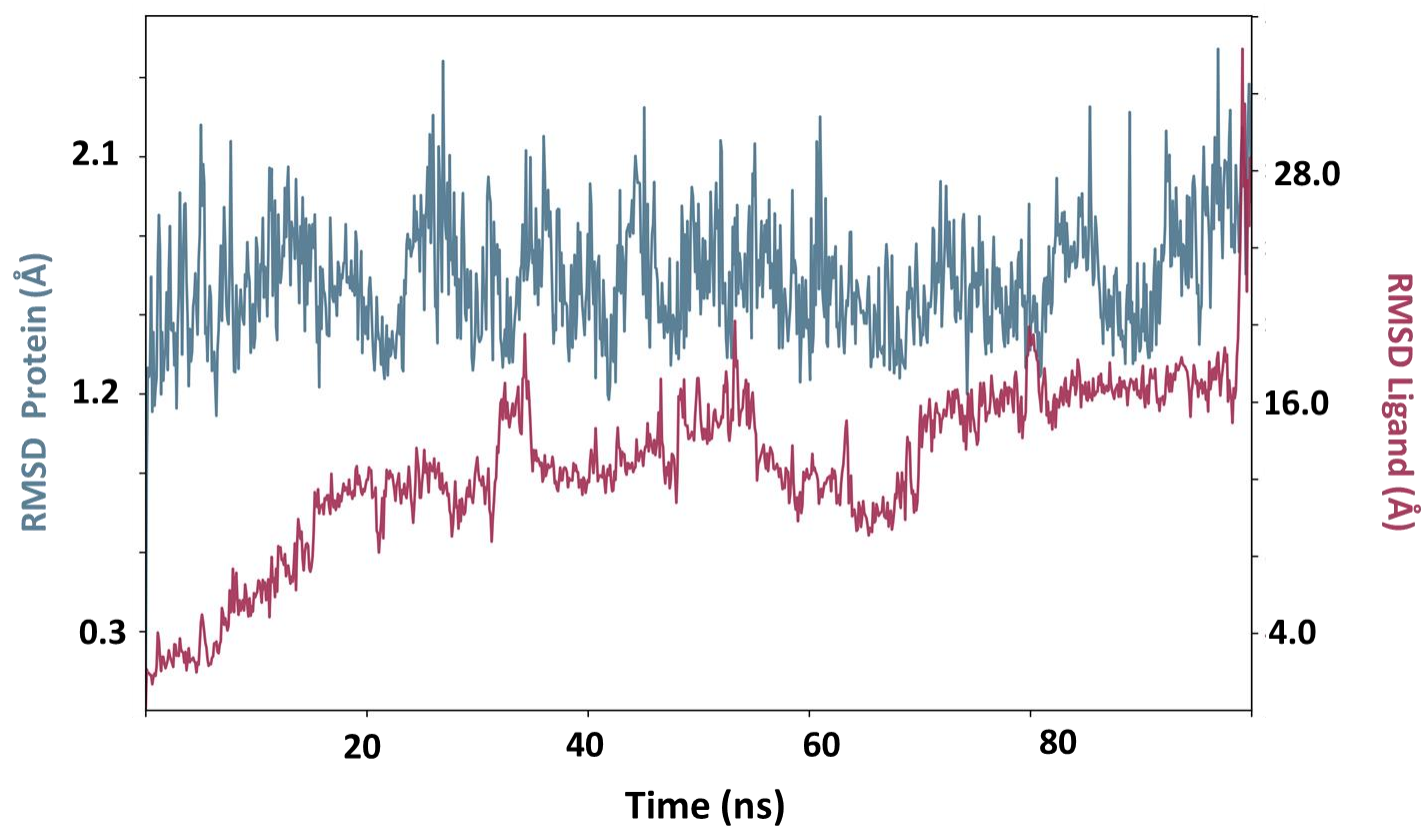

The RMSD of Indinavir in C111 (State of protonation 1)

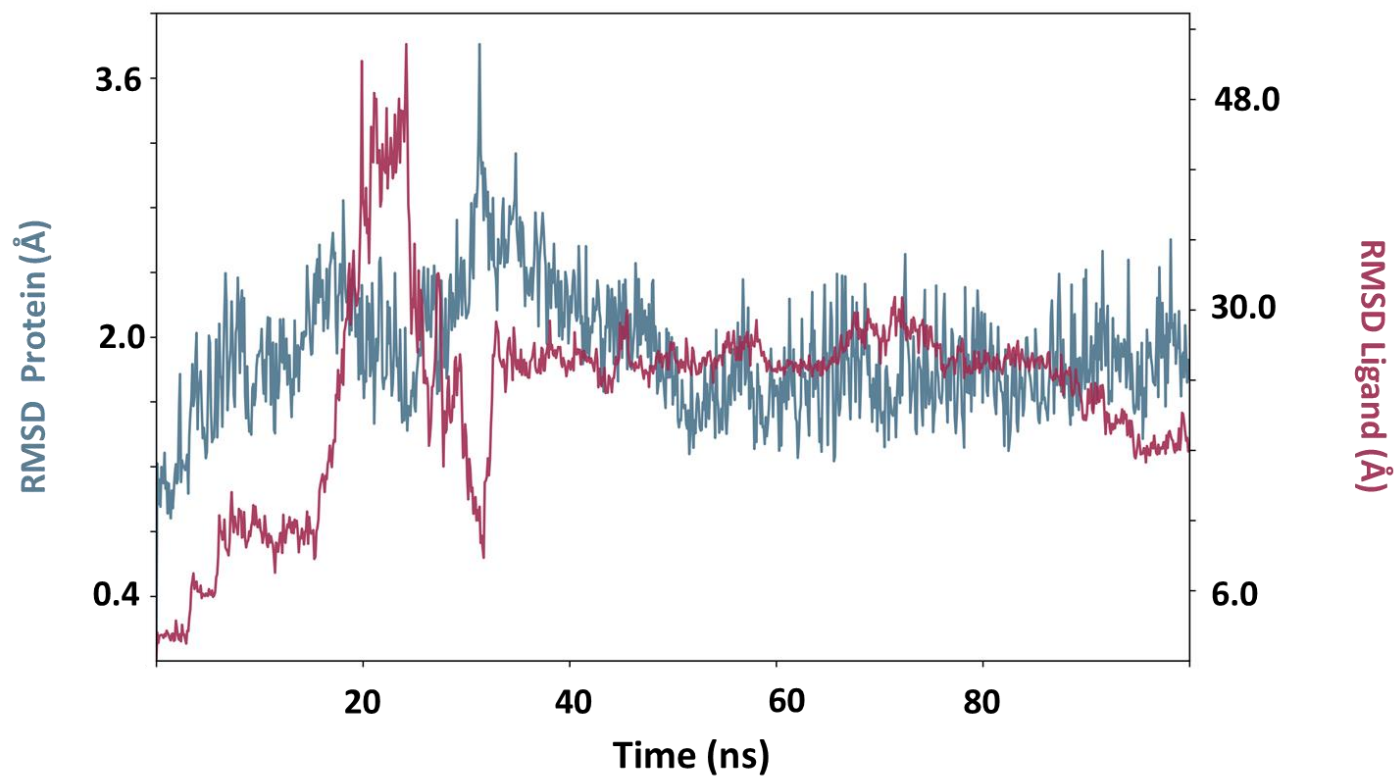

The RMSD of Indinavir in C111 (State of protonation 2)

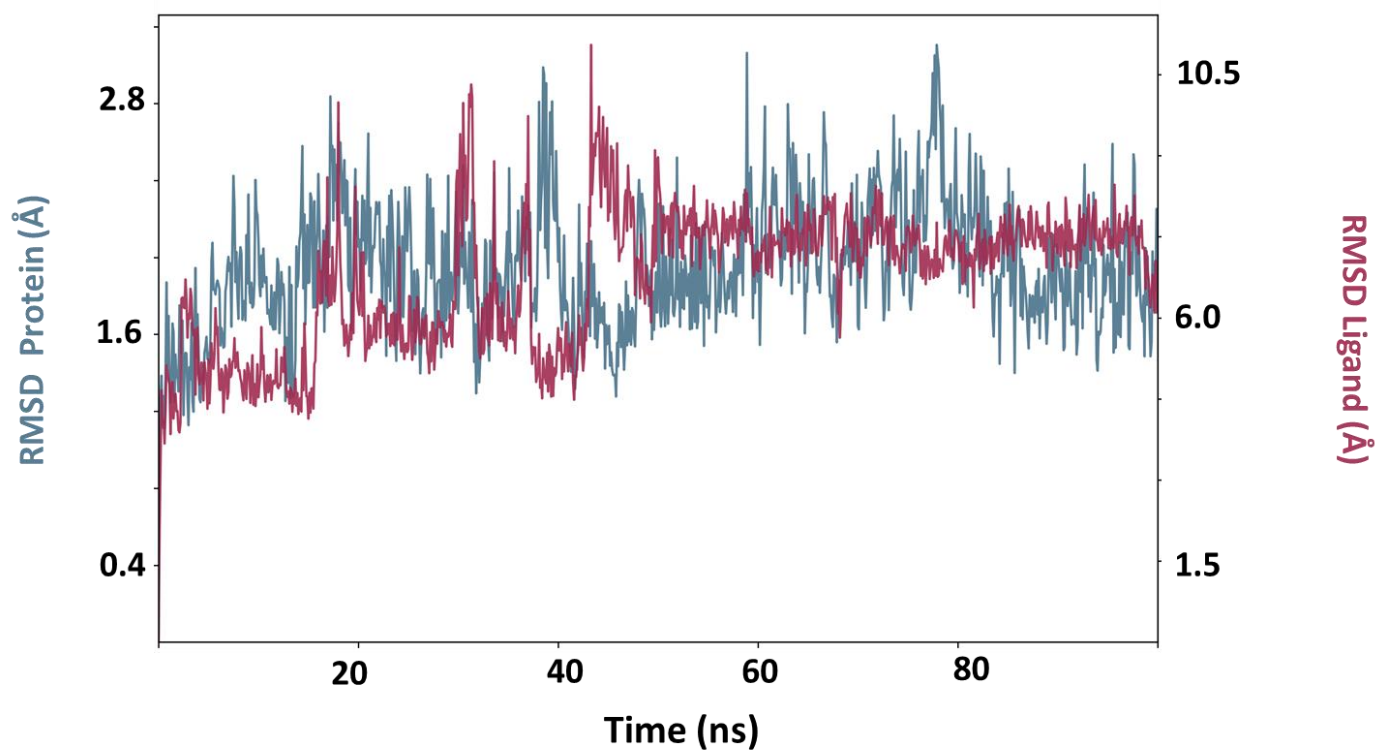

The RMSD of Etravirine in C111

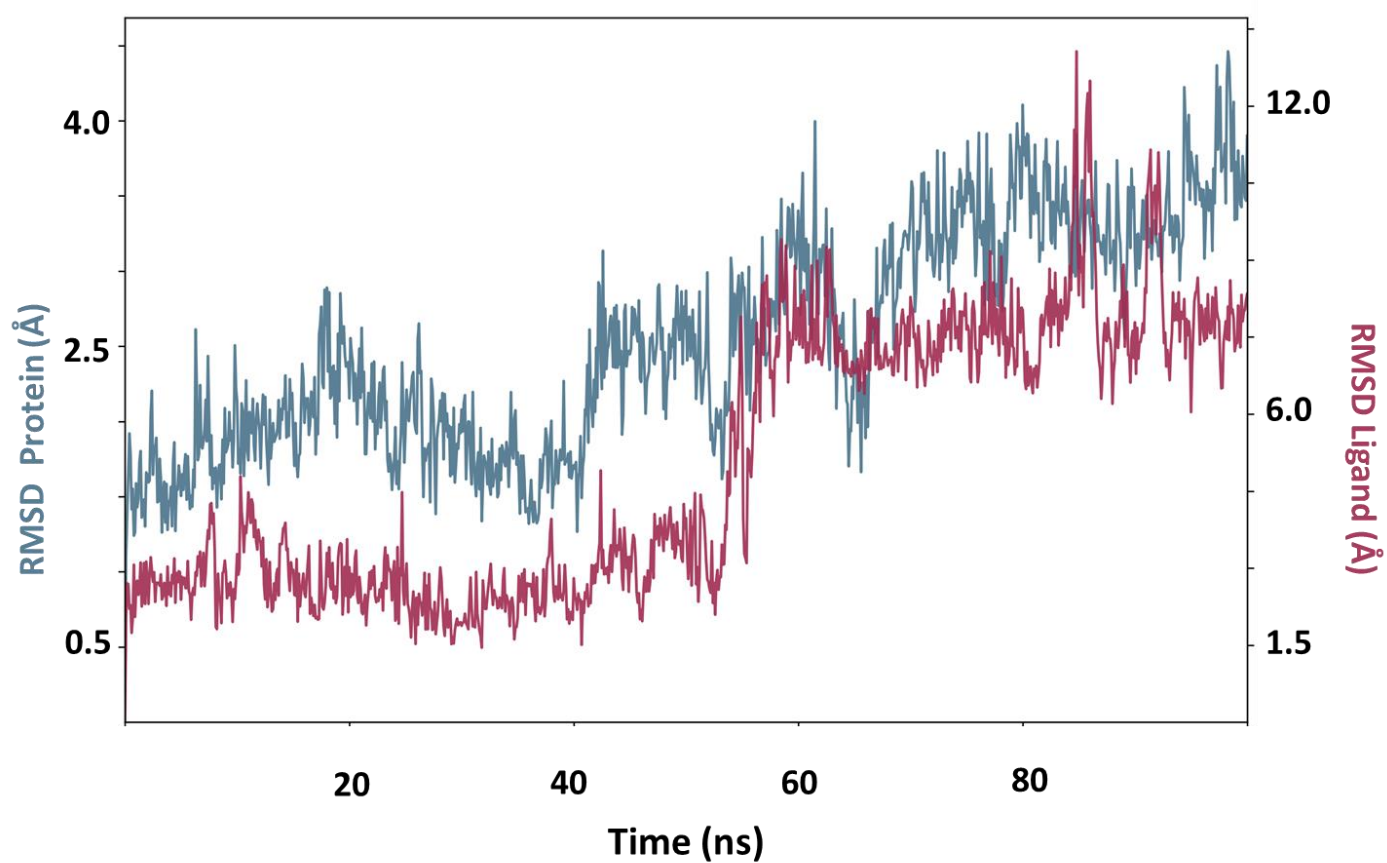

The RMSD of Indinavir in H73 (State of protonation 1)

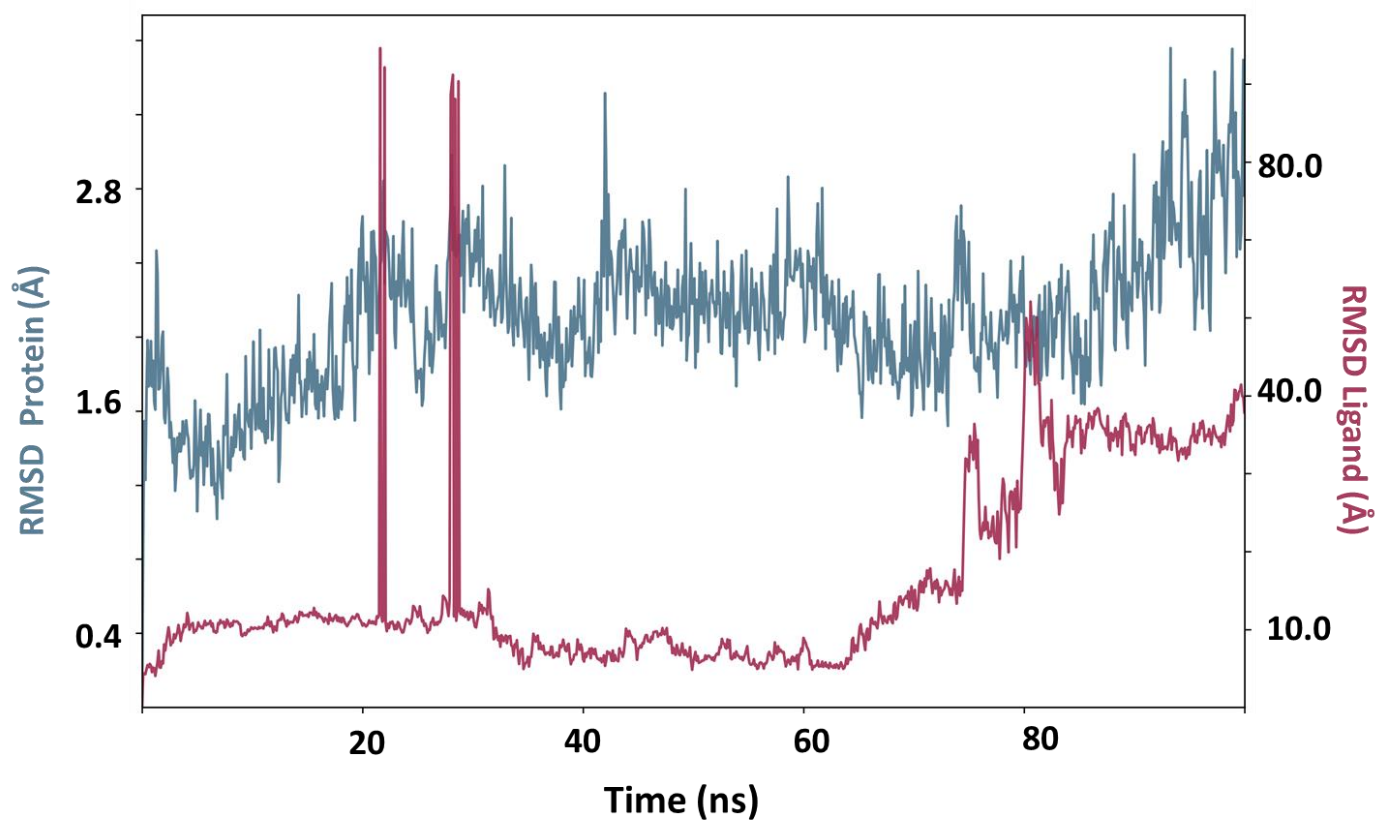

The RMSD of Indinavir in H73 (State of protonation 2)

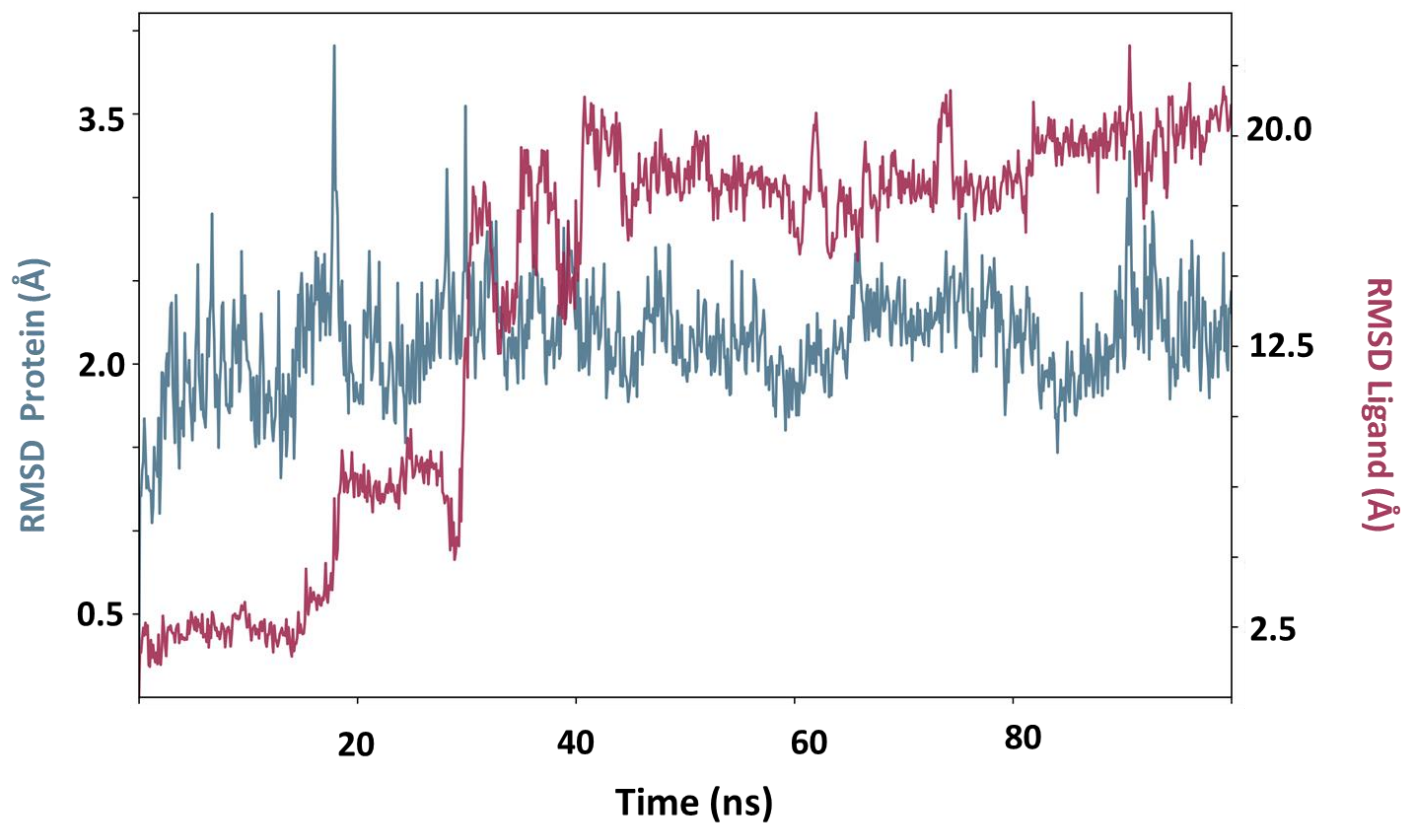

The RMSD of Atazanavir in H73

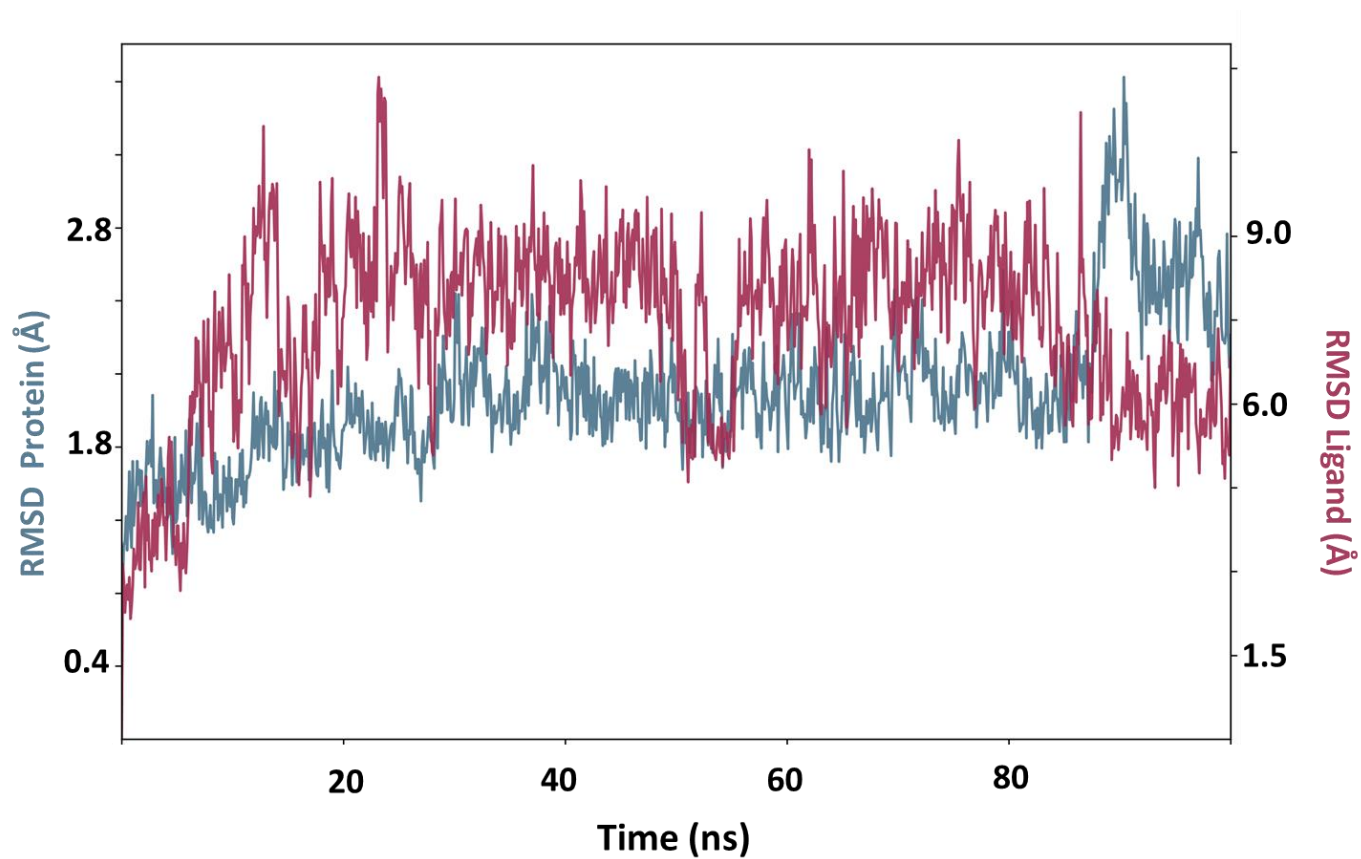

The RMSD of Palinavir in H73

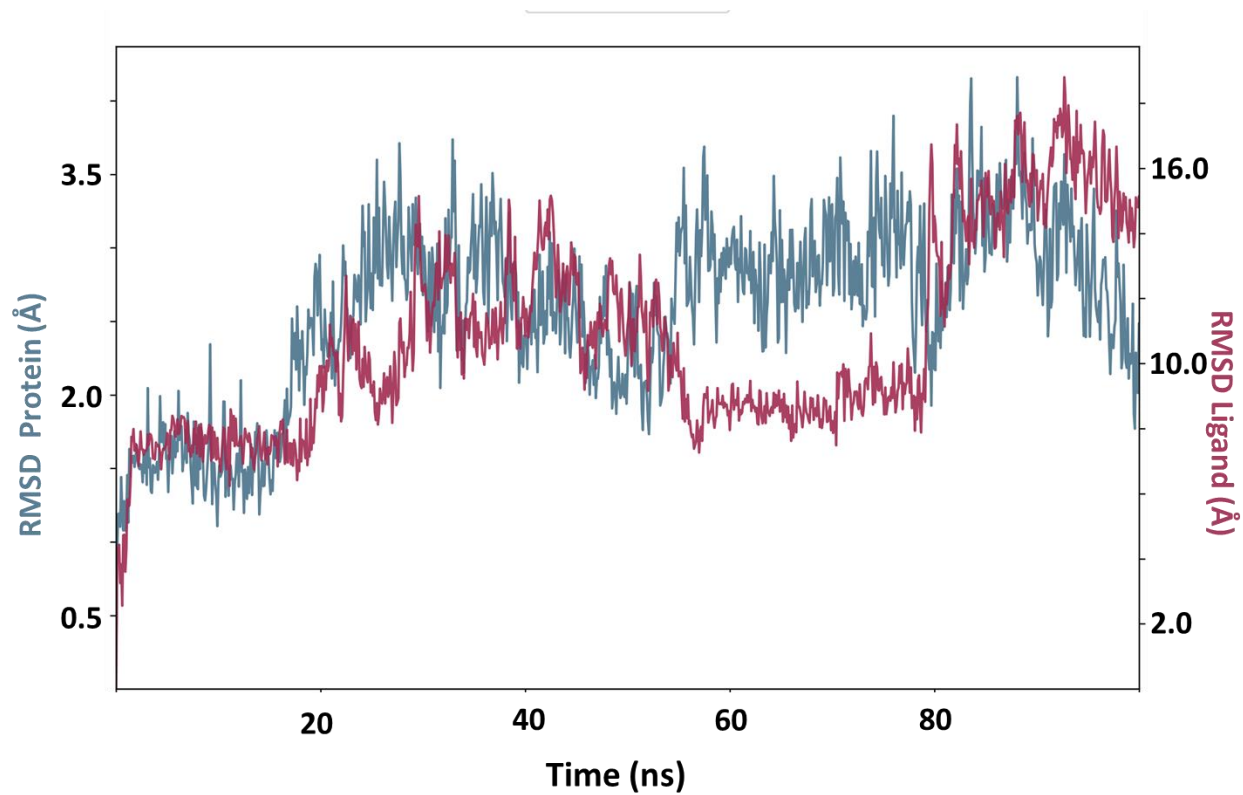



The RMSD of compound Pred14 in Y268

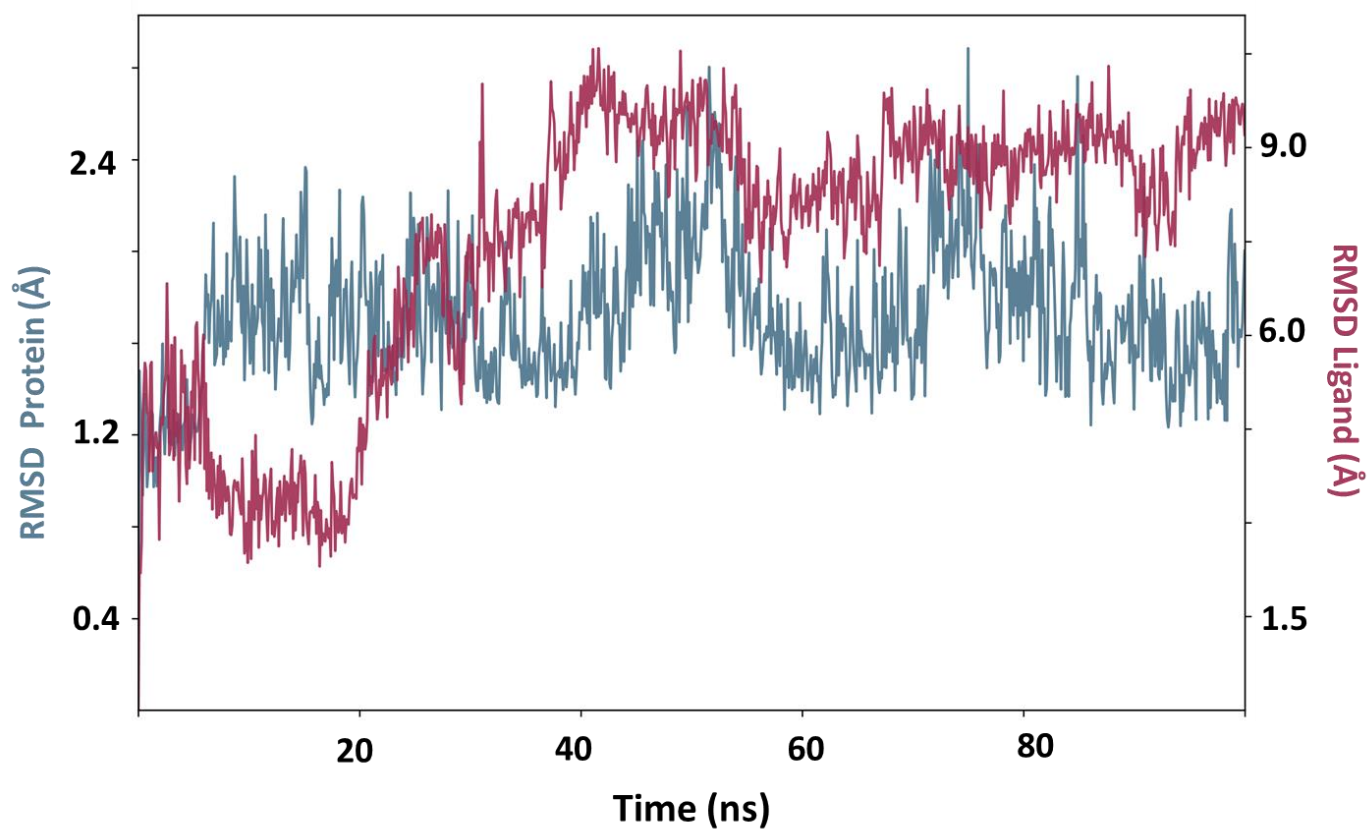

The RMSD of compound Pred15 in Y268

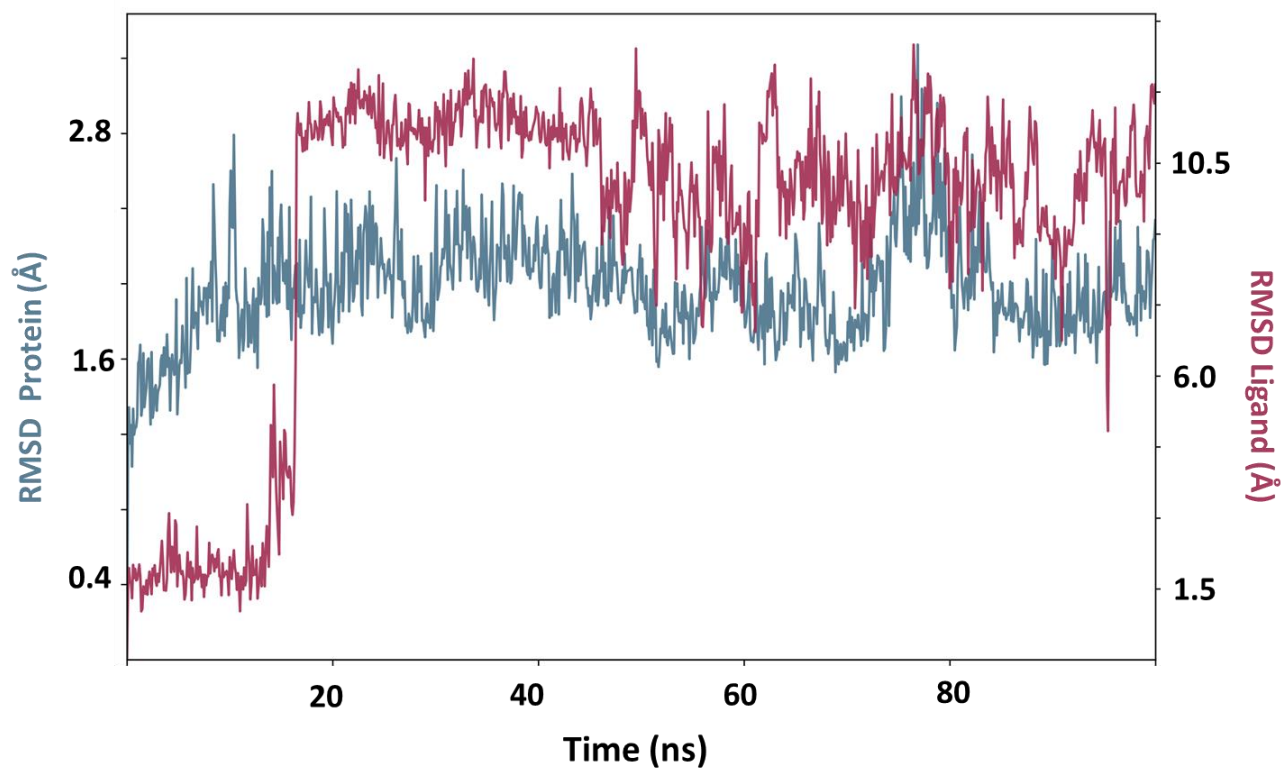

The RMSD of compound Pred12 in Y268

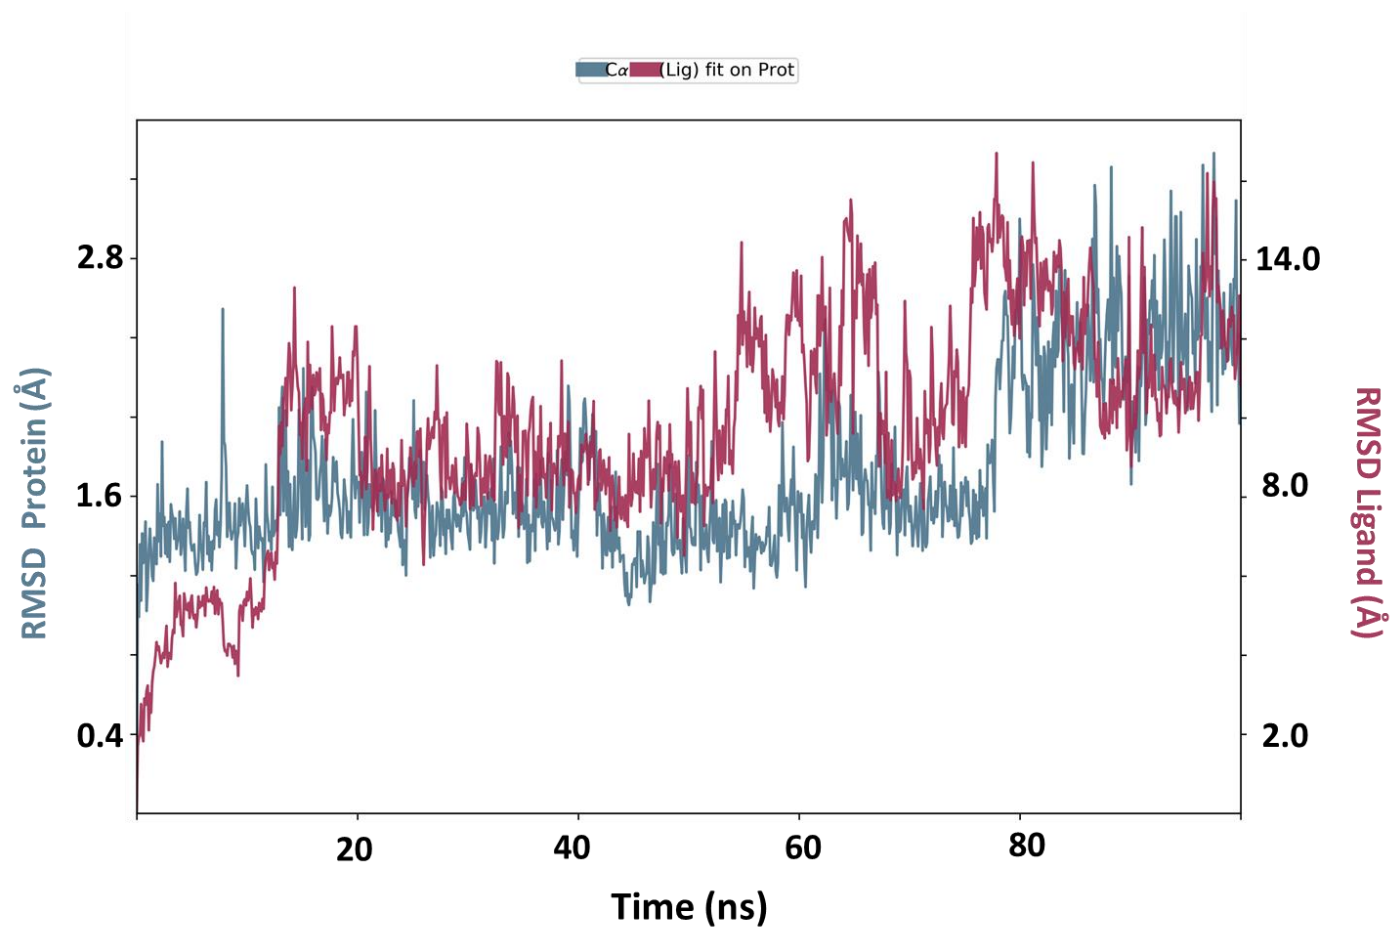

The RMSD of compound Pred10 in Y268

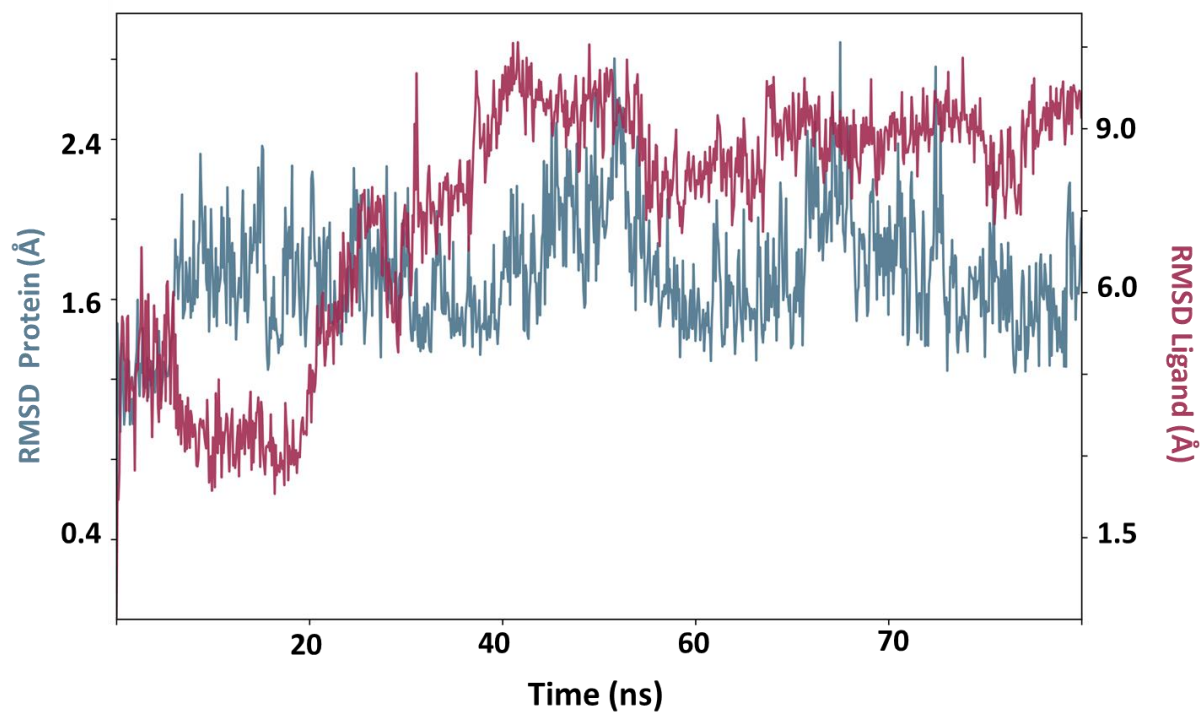

The RMSD of compound Pred15 in C111

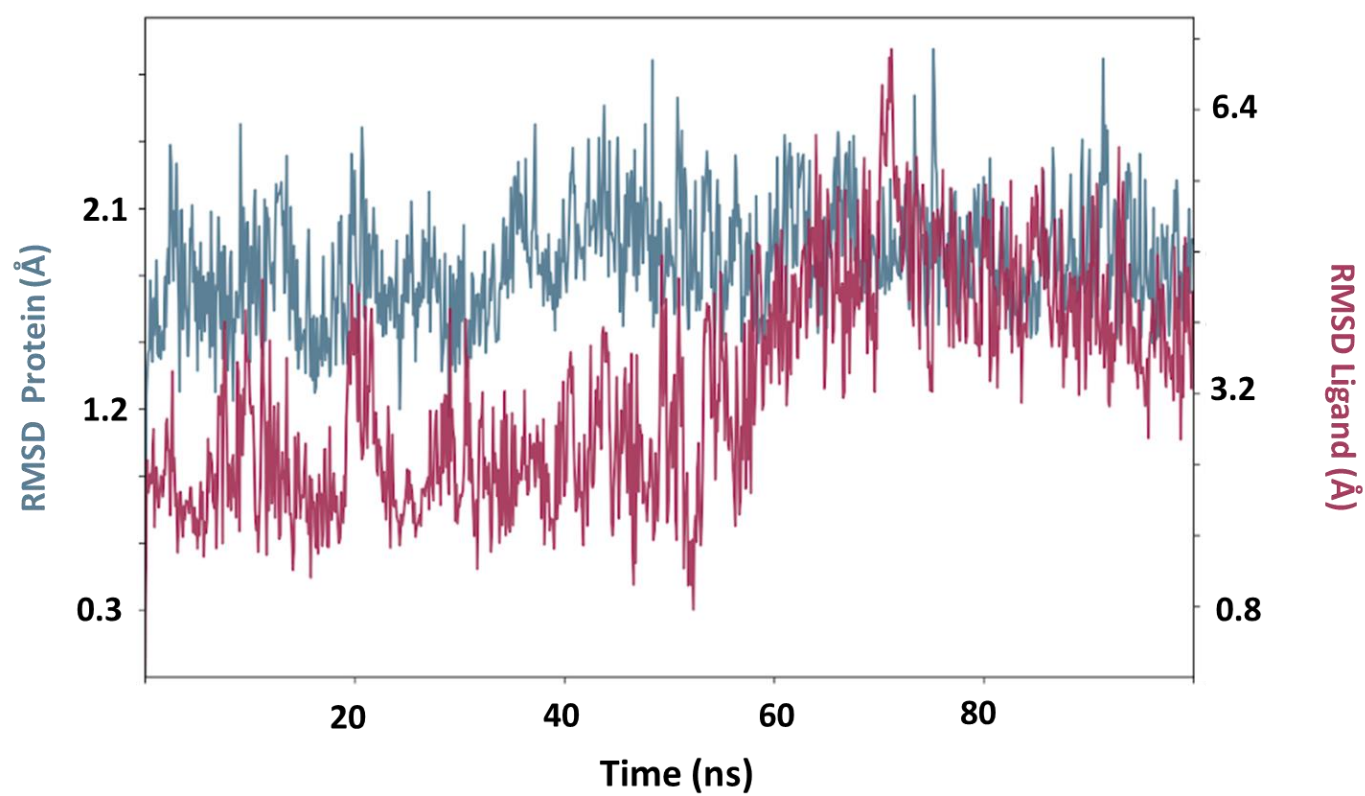

The RMSD of compound Pred14 in C111

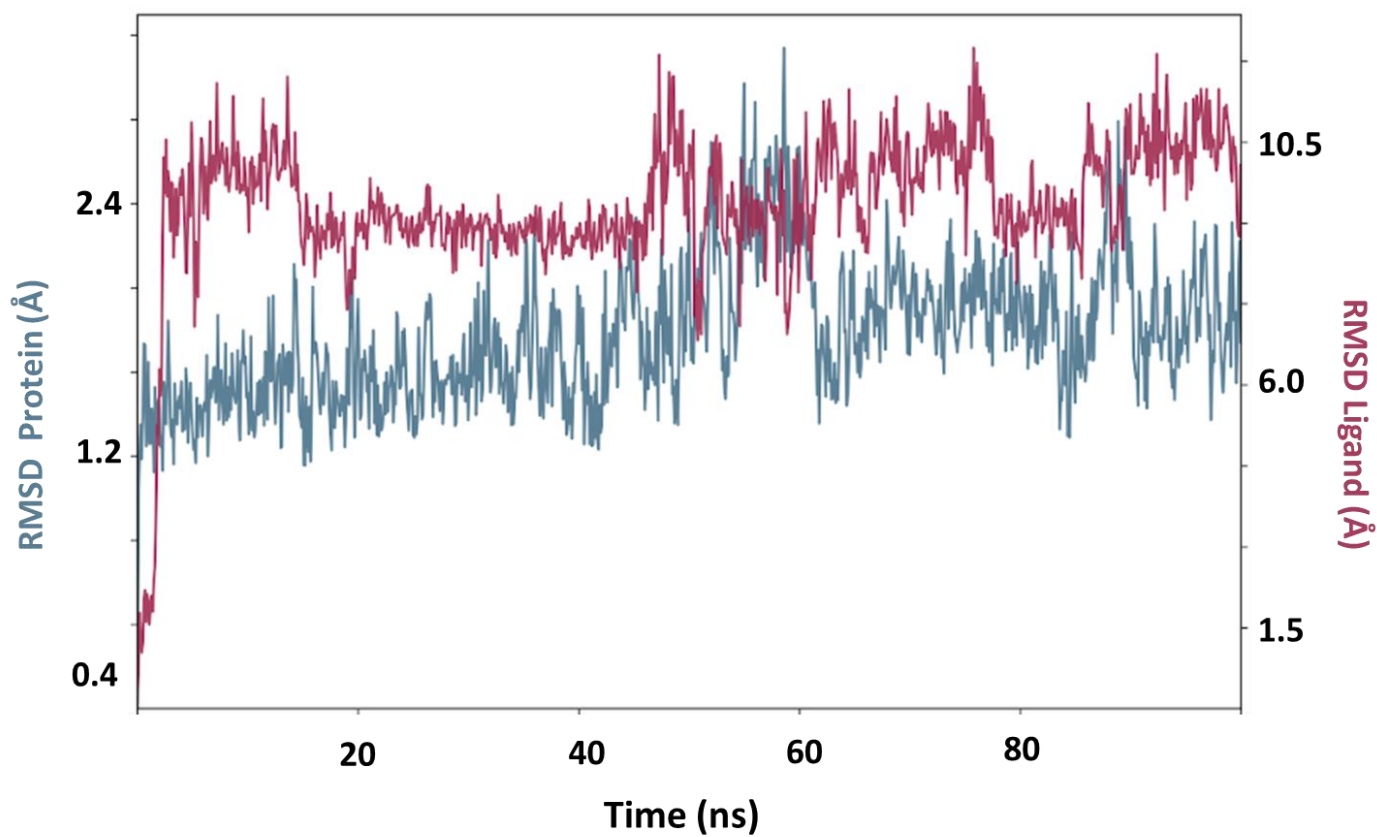



The RMSD of compound Pred13 in C111

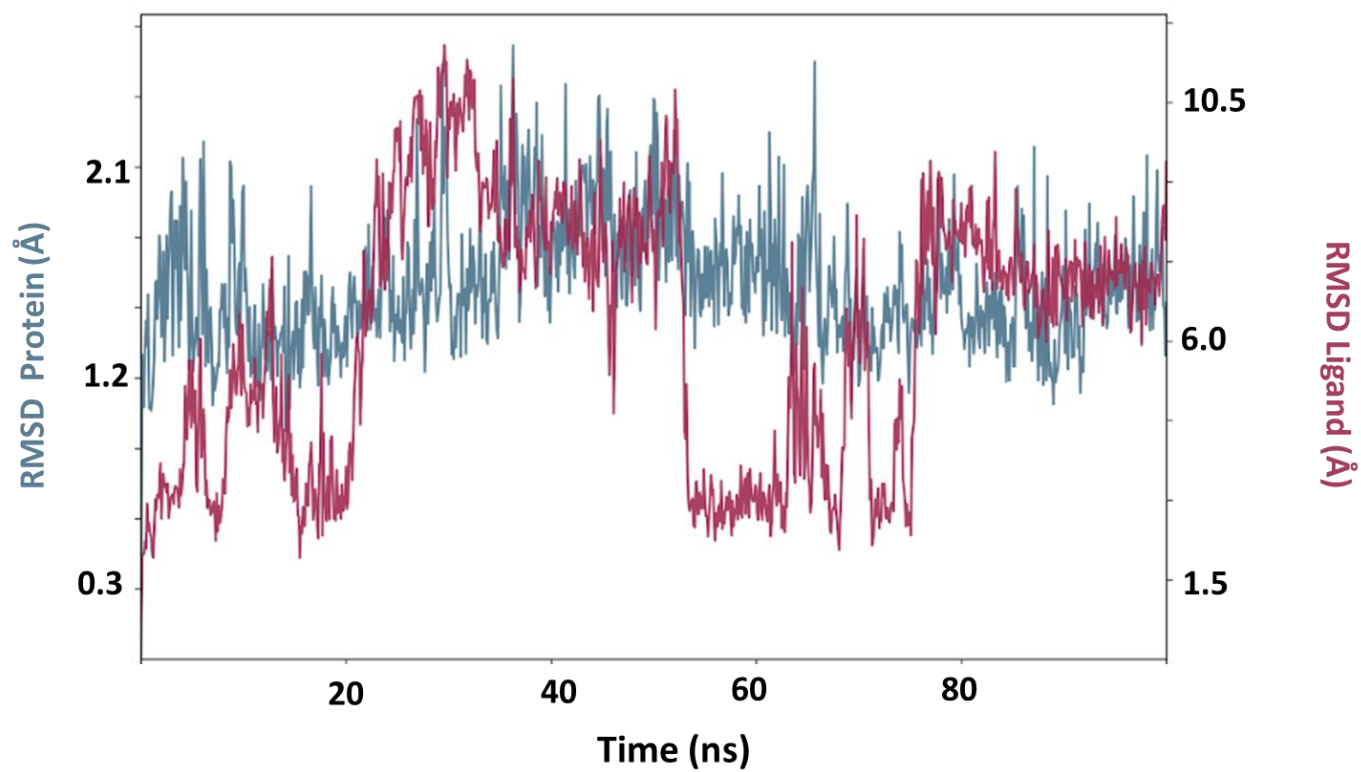

The RMSD of compound Pred6 in C111

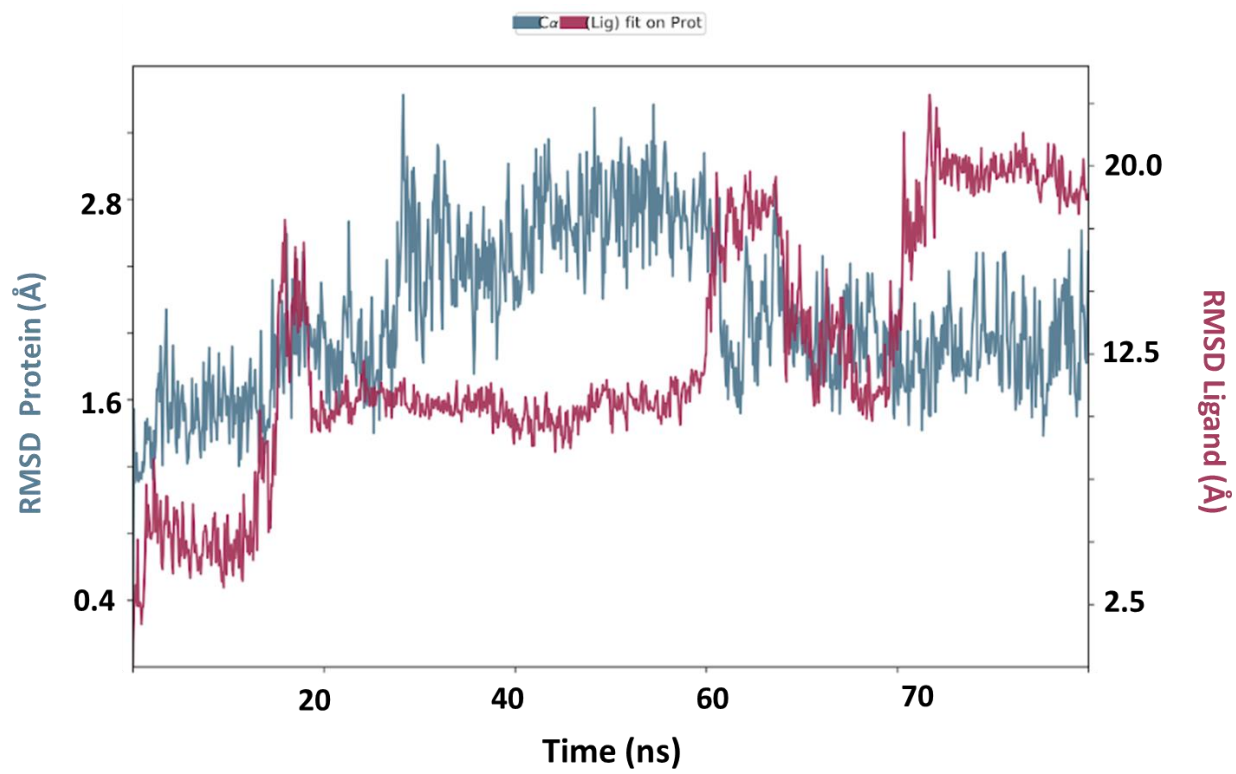

The RMSD of compound Pred14 in H73

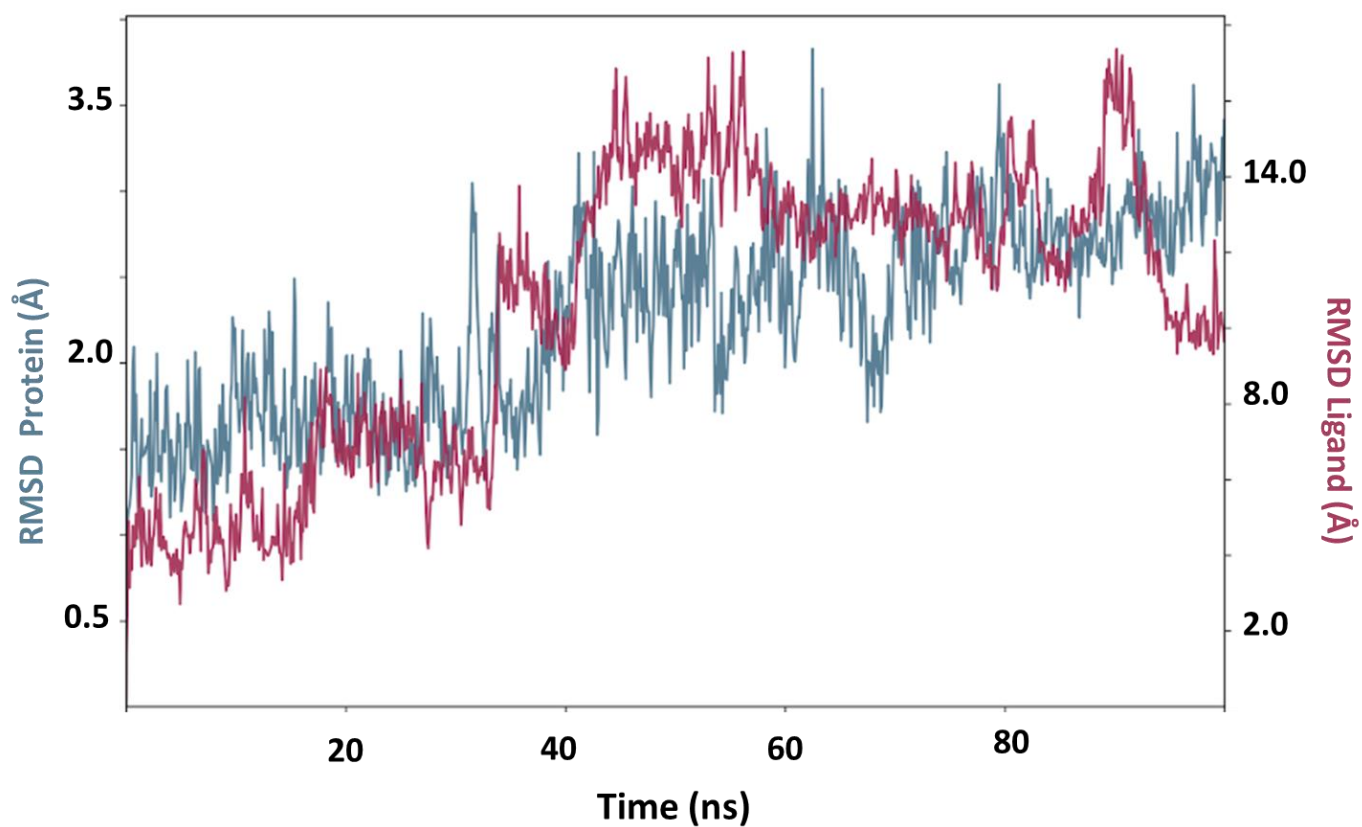

The RMSD of compound Pred10 in H73

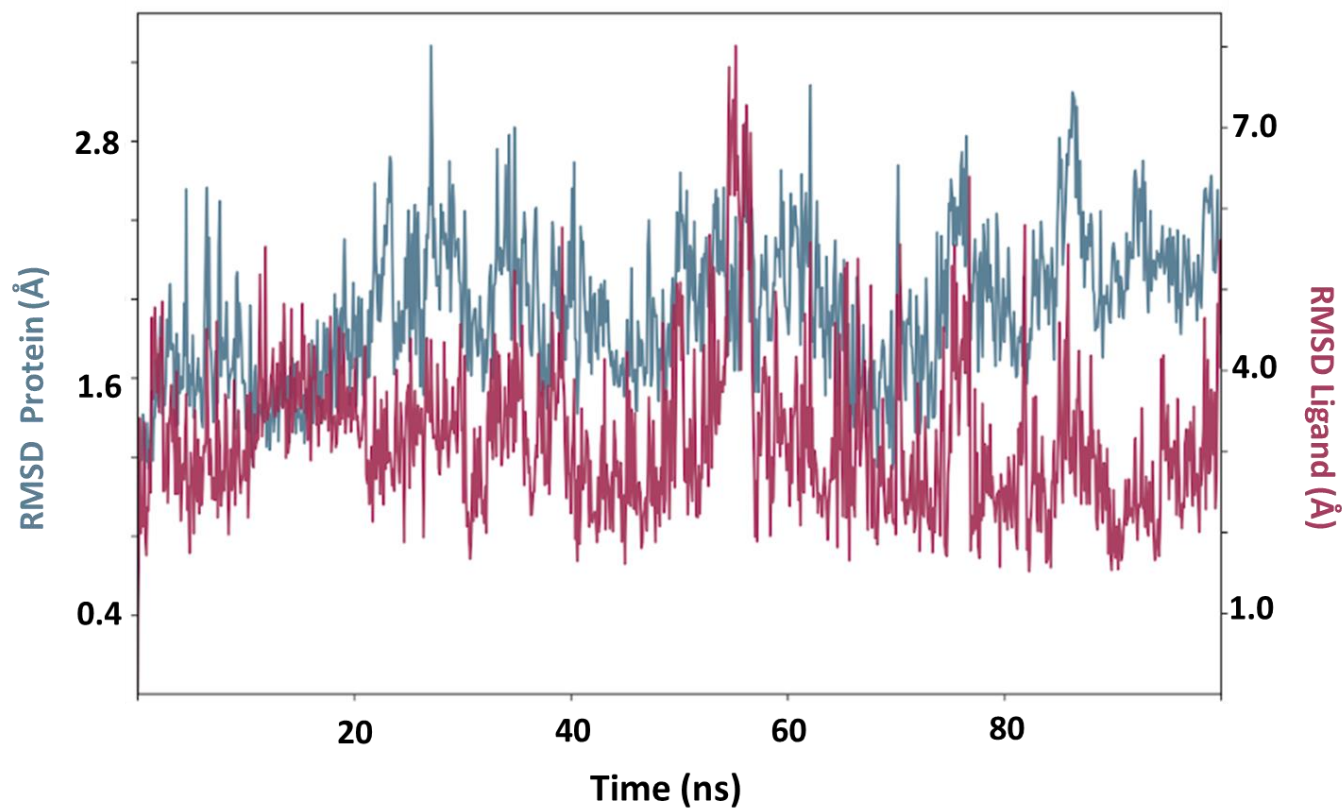

The RMSD of compound Pred15 in H73

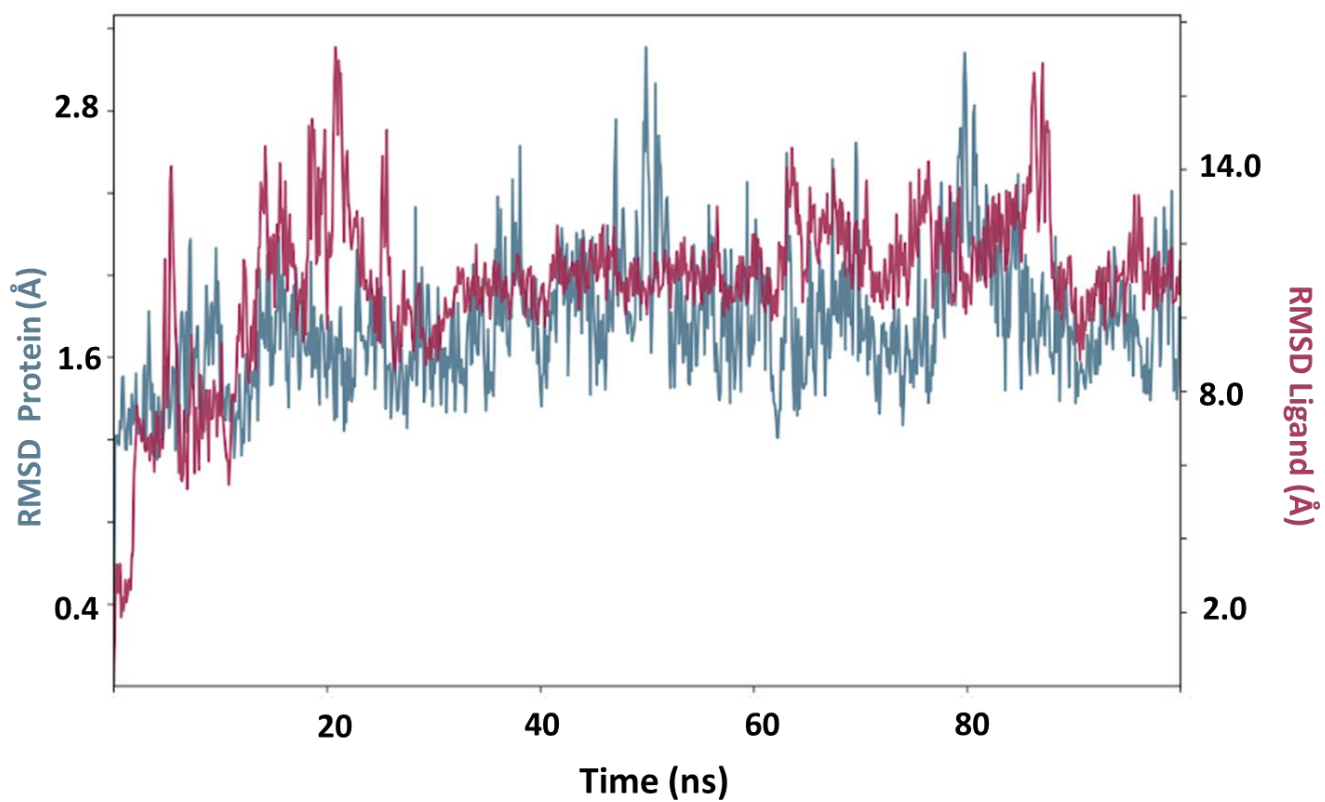

The RMSD of compound Pred2 in H73

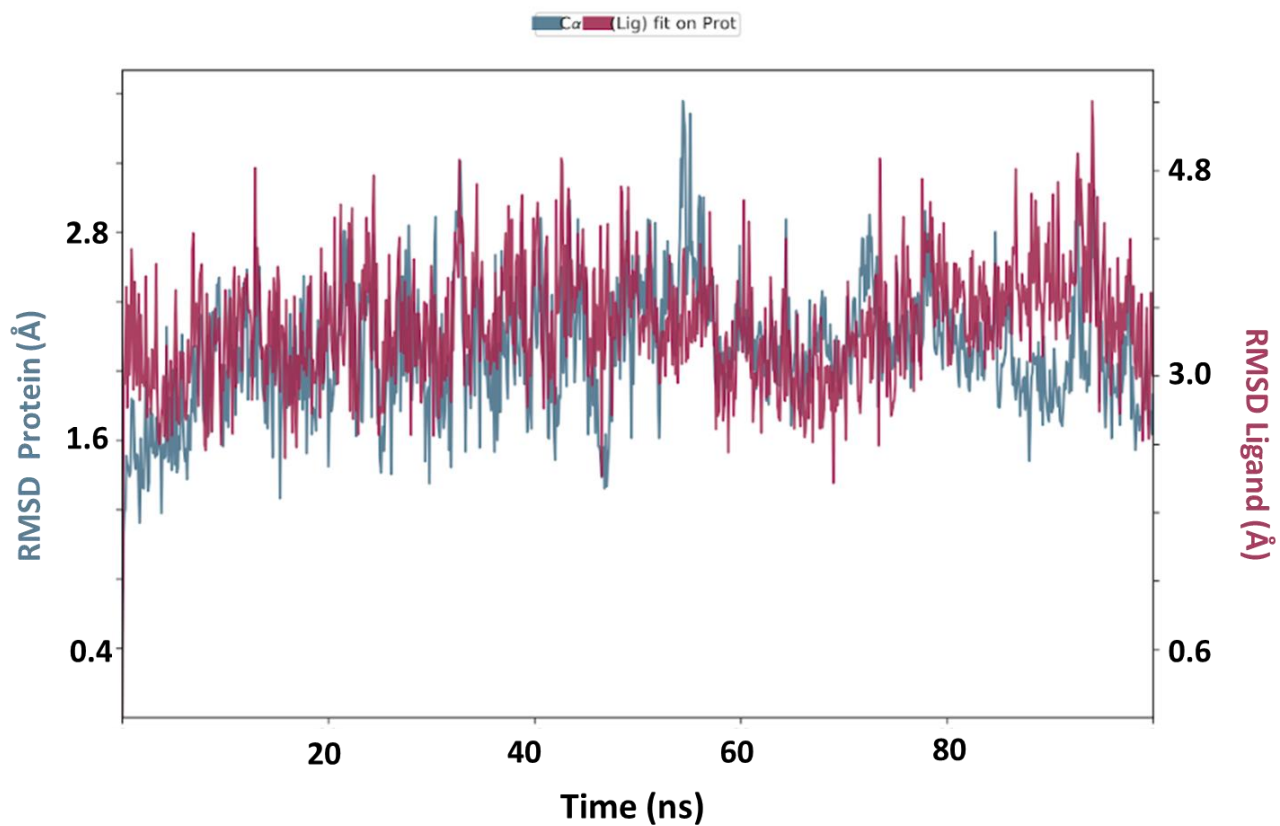

Supplement: s1 [file s1]
